# Supplementary material for: Predicting proteome allocation, overflow metabolism, and metal requirements in a model acetogen
Source: PLoS Comput Biol. 2019 Mar 7;15(3):e1006848. doi: 10.1371/journal.pcbi.1006848 (PMC6430413; doi:10.1371/journal.pcbi.1006848)
Supplement: S2 File — (XLSX) [file pcbi.1006848.s002.xlsx]

## Sheet: Table of contents
Table of contents
Table 1	Protein complexes
Table 2	Protein modifications
Table 3	Transcription units
Table 4	23S rRNA modifications
Table 5	16S rRNA modifications
Table 6	Template reactions for rRNA modifications
Table 7	Types of tRNA modifications
Table 8	Template reactions for tRNA modifications
Table 9	List of tRNAs and their modifications
Table 10	Translocated proteins
Table 11	Template reactions for protein translocation
Table 12	Small-subunit ribosomal RNA genes in Clostridium ljungdahlii
Table 13	Large-subunit ribosomal RNA genes in C. ljungdahlii
Table 14	rRNA genes in C. ljungdahlii
Table 15	RNA polymerase genes in C. ljungdahlii
Table 16	Acetate-to-substrate ratio
Table 17	RAST categories of C. ljungdahlii genes
Table 18	Change in expression of Wood-Ljungdahl reactions when iJL965-ME was simulated with and without nickel on fructose
Table 19	Lists of growth associated genes for SFigure 6
Table 20	List of flux-carrying associated genes associated to reactions listed in the section, "Predicting gene expression"

## Sheet: Table 1
Protein complex name	Gene(stoichiometry)
CPLX-1	CLJU_c19230(1)
CPLX-2	CLJU_c11270(1)
CPLX-3	CLJU_c14360(1)
CPLX-4	CLJU_c11150(1)
CPLX-5	CLJU_c41450(1)
CPLX-6	CLJU_c37130(1)
CPLX-7	CLJU_c14780(1)
CPLX-8	CLJU_c29180(1)
CPLX-9	CLJU_c06340(1)
CPLX-10	CLJU_c34340(1)
CPLX-11	CLJU_c35850(1)
CPLX-12	CLJU_c42390(1)
CPLX-13	CLJU_c16000(1)
CPLX-14	CLJU_c31970(1)
CPLX-15	CLJU_c09090(1) AND CLJU_c09100(1) AND CLJU_c09110(1)
CPLX-16	CLJU_c40310(1)
CPLX-17	CLJU_c13440(1)
CPLX-18	CLJU_c33060(1)
CPLX-19	CLJU_c04480(2)
GluS_mono	CLJU_c13390(1)
CPLX-21	CLJU_c39390(1)
CPLX-22	CLJU_c42190(2)
CPLX-23	CLJU_c42150(1)
CPLX-24	CLJU_c31930(1)
CPLX-25	CLJU_c31940(1)
CPLX-26	CLJU_c34610(1)
CPLX-27	CLJU_c28640(1) AND CLJU_c28650(1) AND CLJU_c28660(1) AND CLJU_c28670(1)
Hyp_CPLX	CLJU_c23060(1) AND CLJU_c23070(1) AND CLJU_c23080(1) AND CLJU_c23090(1)
CPLX-28	CLJU_c33270(1)
Etf3_CPLX	CLJU_c39400(1) AND CLJU_c39410(1) AND CLJU_c39420(1)
CPLX-30	CLJU_c12540(1)
CPLX-31	CLJU_c20430(1) AND CLJU_c38920(1)
CPLX-32	CLJU_c20430(1) AND CLJU_c20420(1)
CPLX-33	CLJU_c20430(1) AND CLJU_c23420(1)
CPLX-34	CLJU_c31860(1)
CPLX-35	CLJU_c41680(1)
CPLX-36	CLJU_c15350(1)
CPLX-37	CLJU_c15320(1)
CPLX-38	CLJU_c12810(2)
CPLX-39	CLJU_c05550(1)
CPLX-40	CLJU_c05320(1)
CPLX-41	CLJU_c20750(1)
CPLX-42	CLJU_c31890(1)
CPLX-43	CLJU_c42130(1)
CPLX-44	CLJU_c21810(1)
CPLX-45	CLJU_c24360(1)
CPLX-46	CLJU_c22090(1)
CPLX-47	CLJU_c21730(1) AND CLJU_c21740(1) AND CLJU_c21750(1) AND CLJU_c21760(2)
CPLX-48	CLJU_c33710(1)
CPLX-49	CLJU_c11700(1) AND CLJU_c11730(1)
CPLX-50	CLJU_c34940(1)
CPLX-51	CLJU_c42160(1)
CPLX-52	CLJU_c26170(1)
CPLX-53	CLJU_c01240(1)
CPLX-54	CLJU_c05920(1)
CPLX-55	CLJU_c02350(1)
CPLX-56	CLJU_c34070(1)
CPLX-57	CLJU_c02910(1)
CPLX-58	CLJU_c02160(1)
CPLX-59	CLJU_c09330(1)
CPLX-60	CLJU_c20430(2) AND CLJU_c20420(2)
CPLX-61	CLJU_c20430(2) AND CLJU_c23420(2)
CPLX-62	CLJU_c20430(2) AND CLJU_c38920(2)
CPLX-63	CLJU_c18130(1)
CPLX-64	CLJU_c33040(1)
CPLX-65	CLJU_c08740(1)
CPLX-66	CLJU_c09370(1)
CPLX-67	CLJU_c24220(1)
CPLX-68	CLJU_c42180(1)
CPLX-69	CLJU_c02840(1)
CPLX-70	CLJU_c18160(1)
CPLX-71	CLJU_c38570(1)
CPLX-72	CLJU_c20470(1)
CPLX-73	CLJU_c39540(1) AND CLJU_c39550(1) AND CLJU_c39560(1)
CPLX-74	CLJU_c11590(1)
CPLX-75	CLJU_c21420(1)
CPLX-76	CLJU_c33940(1)
CPLX-77	CLJU_c22150(1) AND CLJU_c22160(1) AND CLJU_c22170(1)
CPLX-78	CLJU_c38080(1) AND CLJU_c38090(1) AND CLJU_c38100(1)
CPLX-79	CLJU_c17230(1) AND CLJU_c17240(1) AND CLJU_c17250(1)
CPLX-80	CLJU_c04890(1) AND CLJU_c26020(1)
CPLX-81	CLJU_c04890(1) AND CLJU_c22150(1) AND CLJU_c22160(1) AND CLJU_c22170(1)
CPLX-82	CLJU_c37220(1)
CPLX-83	CLJU_c17270(1) AND CLJU_c17280(1)
CPLX-84	CLJU_c20290(1)
CPLX-85	CLJU_c08330(1)
CPLX-86	CLJU_c17900(1)
CPLX-87	CLJU_c11600(1)
CPLX-88	CLJU_c28160(1)
CPLX-89	CLJU_c00620(1)
CPLX-90	CLJU_c31980(1)
FolE_CPLX	CLJU_c06350(10)
CPLX-92	CLJU_c31960(8)
CPLX-93	CLJU_c28750(1)
CPLX-94	CLJU_c29120(1)
CPLX-95	CLJU_c37380(1)
CPLX-96	CLJU_c32890(1)
CPLX-97	CLJU_c38320(1)
CPLX-98	CLJU_c04170(1)
CPLX-99	CLJU_c42370(1)
CPLX-100	CLJU_c12770(1)
CPLX-101	CLJU_c31840(1)
CPLX-102	CLJU_c09060(1) AND CLJU_c09070(1)
CPLX-103	CLJU_c29440(1)
CPLX-104	CLJU_c25210(1) AND CLJU_c25220(1)
CPLX-105	CLJU_c04400(1) AND CLJU_c04410(1)
CPLX-106	CLJU_c11880(1)
CPLX-107	CLJU_c16520(1)
CPLX-108	CLJU_c16510(1)
CPLX-109	CLJU_c01260(1) AND CLJU_c01270(2) AND CLJU_c01280(1)
CPLX-110	CLJU_c31870(1) AND CLJU_c31920(1)
CPLX-111	CLJU_c34560(4)
CPLX-112	CLJU_c04300(4)
CPLX-113	CLJU_c15920(1)
CPLX-114	CLJU_c06220(1)
CPLX-115	CLJU_c16120(2) AND CLJU_c16130(2)
CPLX-116	CLJU_c20410(1)
CPLX-117	CLJU_c33720(2)
CPLX-118	CLJU_c11630(1)
CPLX-119	CLJU_c13610(1)
CPLX-120	CLJU_c34680(1)
CPLX-121	CLJU_c08380(1)
CPLX-122	CLJU_c03180(1)
CPLX-123	CLJU_c20600(1)
CPLX-124	CLJU_c41280(1)
CPLX-125	CLJU_c04900(2) AND CLJU_c04940(1) AND CLJU_c23520(1)
CPLX-126	CLJU_c04900(2) AND CLJU_c23510(1) AND CLJU_c23520(1)
CPLX-127	CLJU_c04940(1) AND CLJU_c23520(1) AND CLJU_c23530(2)
CPLX-128	CLJU_c23510(1) AND CLJU_c23520(1) AND CLJU_c23530(2)
CPLX-129	CLJU_c04900(2) AND CLJU_c04930(1) AND CLJU_c04940(1)
CPLX-130	CLJU_c04900(2) AND CLJU_c04930(1) AND CLJU_c23510(1)
CPLX-131	CLJU_c04930(1) AND CLJU_c04940(1) AND CLJU_c23530(2)
CPLX-132	CLJU_c04930(1) AND CLJU_c23510(1) AND CLJU_c23530(2)
CPLX-133	CLJU_c39580(1) AND CLJU_c39590(1)
CPLX-134	CLJU_c41770(1)
CPLX-135	CLJU_c17690(1)
CPLX-136	CLJU_c32270(1)
CPLX-137	CLJU_c24490(1)
CPLX-138	CLJU_c06640(1)
CPLX-139	CLJU_c01380(1)
CPLX-140	CLJU_c34220(1)
CPLX-141	CLJU_c28200(2)
CPLX-142	CLJU_c12420(2)
CPLX-143	CLJU_c31880(1)
CPLX-144	CLJU_c20810(1)
CPLX-145	CLJU_c08090(1)
CPLX-146	CLJU_c39280(1)
CPLX-147	CLJU_c06600(1)
CPLX-148	CLJU_c08140(1)
CPLX-149	CLJU_c24880(1)
CPLX-150	CLJU_c39950(1)
CPLX-151	CLJU_c13040(6)
CPLX-152	CLJU_c29130(1)
CPLX-153	CLJU_c25500(1)
CPLX-154	CLJU_c29040(1)
CPLX-155	CLJU_c08890(1)
CPLX-156	CLJU_c40830(1)
CPLX-157	CLJU_c39140(1)
CPLX-158	CLJU_c11240(1)
CPLX-159	CLJU_c08560(1)
FabH_dim	CLJU_c42190(2)
CPLX-161	CLJU_c32190(1)
CPLX-162	CLJU_c20590(1)
CPLX-163	CLJU_c26050(1) AND CLJU_c26060(1)
CPLX-164	CLJU_c04980(1)
CPLX-165	CLJU_c31850(1)
CPLX-166	CLJU_c10730(1)
CPLX-167	CLJU_c23580(1)
CPLX-168	CLJU_c28010(1)
CPLX-169	CLJU_c09280(1)
CPLX-170	CLJU_c25230(1)
CPLX-171	CLJU_c42560(3)
CPLX-172	CLJU_c35690(1) AND CLJU_c35700(2)
CPLX-173	CLJU_c37650(1)
CPLX-174	CLJU_c23740(1)
HisGZ_CPLX	CLJU_c11670(1) AND CLJU_c11660(1)
CPLX-176	CLJU_c29000(1)
CPLX-177	CLJU_c40300(1)
CPLX-178	CLJU_c37170(2)
CPLX-179	CLJU_c10570(1)
CPLX-180	CLJU_c12780(2)
CPLX-181	CLJU_c11740(1)
CPLX-182	CLJU_c23480(2)
CPLX-183	CLJU_c06630(1)
CPLX-184	CLJU_c24370(1)
CPLX-185	CLJU_c39310(1)
CPLX-186	CLJU_c10140(1)
CPLX-187	CLJU_c27340(1)
CPLX-188	CLJU_c27820(1)
CPLX-189	CLJU_c27260(1)
CPLX-190	CLJU_c07730(1)
CPLX-191	CLJU_c32010(1)
CPLX-192	CLJU_c28000(1)
CPLX-193	CLJU_c42550(1)
CPLX-194	CLJU_c09300(1)
CPLX-195	CLJU_c15300(1)
CPLX-196	CLJU_c23570(1)
CPLX-197	CLJU_c23800(1)
CPLX-198	CLJU_c01200(1)
CPLX-199	CLJU_c20530(1)
CPLX-200	CLJU_c02950(1)
CPLX-201	CLJU_c18050(4)
CPLX-202	CLJU_c34550(4)
CPLX-203	CLJU_c08570(1)
CPLX-204	CLJU_c18280(1)
CPLX-205	CLJU_c08590(1)
CPLX-206	CLJU_c22210(1)
CPLX-207	CLJU_c37180(4)
CPLX-208	CLJU_c12450(1)
CPLX-209	CLJU_c13340(1)
CPLX-210	CLJU_c04650(1)
CPLX-211	CLJU_c33920(1)
CPLX-212	CLJU_c41540(1)
CPLX-213	CLJU_c39130(2)
CPLX-214	CLJU_c16880(1)
CPLX-215	CLJU_c06620(1)
CPLX-216	CLJU_c30460(1)
CPLX-217	CLJU_c01250(1)
CPLX-218	CLJU_c11540(1)
CPLX-219	CLJU_c38310(2)
CPLX-220	CLJU_c29150(1)
CPLX-221	CLJU_c03260(1)
CPLX-222	CLJU_c17740(1)
GlcA_mono	CLJU_c21610(1)
CPLX-224	CLJU_c35720(1) AND CLJU_c35730(1)
CPLX-225	CLJU_c35930(1)
CPLX-226	CLJU_c23590(1) AND CLJU_c23600(1) AND CLJU_c23610(1)
CPLX-227	CLJU_c23890(1) AND CLJU_c23900(1) AND CLJU_c23910(1)
CPLX-228	CLJU_c29920(1) AND CLJU_c29930(1) AND CLJU_c29940(1)
CPLX-229	CLJU_c21330(1)
CPLX-230	CLJU_c37490(1)
CPLX-231	CLJU_c11160(2)
CPLX-232	CLJU_c13270(1)
CPLX-233	CLJU_c40590(1) AND CLJU_c40600(1)
CPLX-234	CLJU_c32020(1)
CPLX-235	CLJU_c11710(1)
CPLX-236	CLJU_c10760(1)
CPLX-237	CLJU_c17390(1)
CPLX-238	CLJU_c20400(1)
CPLX-239	CLJU_c20390(1)
CPLX-240	CLJU_c15310(1)
CPLX-241	CLJU_c13190(1)
CPLX-242	CLJU_c24860(1)
CPLX-243	CLJU_c15090(1)
CPLX-244	CLJU_c31900(1) AND CLJU_c31910(1)
CPLX-245	CLJU_c39110(1)
CPLX-246	CLJU_c01390(1)
CPLX-247	CLJU_c26510(1) AND CLJU_c26520(1) AND CLJU_c26530(1)
CPLX-248	CLJU_c03000(1)
CPLX-249	CLJU_c13170(1)
CPLX-250	CLJU_c24150(1) AND CLJU_c24160(1) AND CLJU_c24170(1) AND CLJU_c37600(1)
CPLX-251	CLJU_c24150(1) AND CLJU_c24160(1) AND CLJU_c37540(1) AND CLJU_c37600(1)
CPLX-252	CLJU_c04490(2)
CPLX-253	CLJU_c31990(1)
CPLX-254	CLJU_c40280(1)
CPLX-255	CLJU_c13430(1)
CPLX-256	CLJU_c22800(1) AND CLJU_c22820(1)
CPLX-257	CLJU_c02690(1)
CPLX-258	CLJU_c08540(1)
CPLX-259	CLJU_c42350(2)
CPLX-260	CLJU_c35680(2)
CPLX-261_Etf1_CPLX	CLJU_c37610(1) AND CLJU_c37620(1) AND CLJU_c13890(1) AND CLJU_c13880(1)
CPLX-261_Etf2_CPLX	CLJU_c37610(1) AND CLJU_c37620(1) AND CLJU_c20340(1) AND CLJU_c20330(1)
CPLX-261_Etf3_CPLX	CLJU_c37610(1) AND CLJU_c37620(1) AND CLJU_c39400(1) AND CLJU_c39410(1)
CPLX-262	CLJU_c09360(1)
CPLX-263	CLJU_c21640(1)
CPLX-264	CLJU_c06000(1)
CPLX-265	CLJU_c16100(1)
ValS_mono	CLJU_c34690(1)
CPLX-267	CLJU_c01220(1)
CPLX-268	CLJU_c21290(1)
Ser_RS_dim	CLJU_c00170(2)
CPLX-270	CLJU_c42610(1)
CPLX-272	CLJU_c05350(1)
CPLX-273	CLJU_c05580(1)
RibBA_mono	CLJU_c22070(1)
CPLX-275	CLJU_c11810(1)
CPLX-276	CLJU_c39450(1)
CPLX-277	CLJU_c24380(1)
CPLX-279	CLJU_c11690(1)
CPLX-280	CLJU_c24150(1) AND CLJU_c24160(1) AND CLJU_c24170(1) AND CLJU_c24180(1) AND CLJU_c37600(1)
CPLX-281	CLJU_c24150(1) AND CLJU_c24160(1) AND CLJU_c24180(1) AND CLJU_c37540(1) AND CLJU_c37600(1)
CPLX-282	CLJU_c11680(1)
CPLX-283	CLJU_c42600(1)
CPLX-284	CLJU_c18240(4)
CPLX-285	CLJU_c17820(1)
CPLX-286	CLJU_c15570(1)
CPLX-287	CLJU_c11890(1)
CPLX-288	CLJU_c40440(1)
CPLX-289	CLJU_c40360(1)
CPLX-290	CLJU_c33180(1)
CPLX-291	CLJU_c08950(1)
CPLX-292	CLJU_c33250(1) AND CLJU_c33260(1)
CPLX-293	CLJU_c08600(1)
CPLX-294	CLJU_c35520(1)
CPLX-295	CLJU_c03870(1)
CPLX-296	CLJU_c13080(1)
CPLX-297	CLJU_c31820(1)
CPLX-298	CLJU_c08880(1) AND CLJU_c08970(1)
CPLX-299	CLJU_c08970(1) AND CLJU_c40350(1)
NADH-DHI-CPLX_FdhA_mono	CLJU_c07030(1) AND CLJU_c07040(1) AND CLJU_c07050(1) AND CLJU_c07060(1) AND CLJU_c07070(1) AND CLJU_c07080(1) AND CLJU_c20040(1)
NADH-DHI-CPLX_FdhAII_mono	CLJU_c07030(1) AND CLJU_c07040(1) AND CLJU_c07050(1) AND CLJU_c07060(1) AND CLJU_c07070(1) AND CLJU_c07080(1) AND CLJU_c06990(1)
NADH-DHI-CPLX_FdhAIII_mono	CLJU_c07030(1) AND CLJU_c07040(1) AND CLJU_c07050(1) AND CLJU_c07060(1) AND CLJU_c07070(1) AND CLJU_c07080(1) AND CLJU_c08930(1)
NADH-DHI-II-CPLX_FdhA_mono	CLJU_c14700(1) AND CLJU_c14710(1) AND CLJU_c14720(1) AND CLJU_c07060(1) AND CLJU_c07070(1) AND CLJU_c07080(1) AND CLJU_c20040(1)
NADH-DHI-II-CPLX_FdhAII_mono	CLJU_c14700(1) AND CLJU_c14710(1) AND CLJU_c14720(1) AND CLJU_c07060(1) AND CLJU_c07070(1) AND CLJU_c07080(1) AND CLJU_c06990(1)
NADH-DHI-II-CPLX_FdhAIII_mono	CLJU_c14700(1) AND CLJU_c14710(1) AND CLJU_c14720(1) AND CLJU_c07060(1) AND CLJU_c07070(1) AND CLJU_c07080(1) AND CLJU_c08930(1)
NADH-DHI-CPLX	CLJU_c07030(1) AND CLJU_c07040(1) AND CLJU_c07050(1) AND CLJU_c07060(1) AND CLJU_c07070(1) AND CLJU_c07080(1)
NADH-DHI-II-CPLX	CLJU_c14700(1) AND CLJU_c14710(1) AND CLJU_c14720(1) AND CLJU_c07060(1) AND CLJU_c07070(1) AND CLJU_c07080(1)
CPLX-302	CLJU_c18120(1)
CPLX-303	CLJU_c22200(1) AND CLJU_c31790(1) AND CLJU_c31800(1)
CPLX-304	CLJU_c04010(1) AND CLJU_c31790(1) AND CLJU_c31800(1)
CPLX-305	CLJU_c31790(1) AND CLJU_c31800(1) AND CLJU_c38160(1)
CPLX-306	CLJU_c31790(1) AND CLJU_c31800(1) AND CLJU_c37880(1)
CPLX-307	CLJU_c12640(1)
CPLX-308	CLJU_c20790(1)
FadD_mono	CLJU_c42170(1)
CPLX-310	CLJU_c24450(1)
CPLX-311	CLJU_c12480(1)
CPLX-312	CLJU_c06120(1)
CPLX-313	CLJU_c21180(1)
CPLX-314	CLJU_c03250(4)
CPLX-315	CLJU_c25790(4)
CPLX-316	CLJU_c07300(1)
CPLX-317	CLJU_c14280(2)
CPLX-318	CLJU_c42590(1)
CPLX-319	CLJU_c28110(1)
CPLX-320	CLJU_c38380(1)
CPLX-321	CLJU_c16070(1) AND CLJU_c16080(1)
CPLX-322	CLJU_c05540(1)
CPLX-323	CLJU_c05310(1)
CPLX-324	CLJU_c01930(1)
CPLX-325	CLJU_c25320(1) AND CLJU_c25340(1) AND CLJU_c30480(1)
CPLX-326	CLJU_c25340(1) AND CLJU_c30480(1) AND CLJU_c40560(1)
CPLX-327	CLJU_c25340(1) AND CLJU_c30470(1) AND CLJU_c30480(1)
CPLX-328	CLJU_c25320(1) AND CLJU_c25330(1) AND CLJU_c25340(1)
CPLX-329	CLJU_c25330(1) AND CLJU_c25340(1) AND CLJU_c40560(1)
CPLX-330	CLJU_c25330(1) AND CLJU_c25340(1) AND CLJU_c30470(1)
CPLX-331	CLJU_c25320(1) AND CLJU_c25340(1) AND CLJU_c40570(1)
CPLX-332	CLJU_c25340(1) AND CLJU_c40560(1) AND CLJU_c40570(1)
CPLX-333	CLJU_c25340(1) AND CLJU_c30470(1) AND CLJU_c40570(1)
CPLX-334	CLJU_c25320(1) AND CLJU_c30480(1) AND CLJU_c40580(1)
CPLX-335	CLJU_c30480(1) AND CLJU_c40560(1) AND CLJU_c40580(1)
CPLX-336	CLJU_c30470(1) AND CLJU_c30480(1) AND CLJU_c40580(1)
CPLX-337	CLJU_c25320(1) AND CLJU_c25330(1) AND CLJU_c40580(1)
CPLX-338	CLJU_c25330(1) AND CLJU_c40560(1) AND CLJU_c40580(1)
CPLX-339	CLJU_c25330(1) AND CLJU_c30470(1) AND CLJU_c40580(1)
CPLX-340	CLJU_c25320(1) AND CLJU_c40570(1) AND CLJU_c40580(1)
CPLX-341	CLJU_c40560(1) AND CLJU_c40570(1) AND CLJU_c40580(1)
CPLX-342	CLJU_c30470(1) AND CLJU_c40570(1) AND CLJU_c40580(1)
CPLX-343	CLJU_c25320(1) AND CLJU_c30480(1) AND CLJU_c30490(1)
CPLX-344	CLJU_c30480(1) AND CLJU_c30490(1) AND CLJU_c40560(1)
CPLX-345	CLJU_c30470(1) AND CLJU_c30480(1) AND CLJU_c30490(1)
CPLX-346	CLJU_c25320(1) AND CLJU_c25330(1) AND CLJU_c30490(1)
CPLX-347	CLJU_c25330(1) AND CLJU_c30490(1) AND CLJU_c40560(1)
CPLX-348	CLJU_c25330(1) AND CLJU_c30470(1) AND CLJU_c30490(1)
CPLX-349	CLJU_c25320(1) AND CLJU_c30490(1) AND CLJU_c40570(1)
CPLX-350	CLJU_c30490(1) AND CLJU_c40560(1) AND CLJU_c40570(1)
CPLX-351	CLJU_c30470(1) AND CLJU_c30490(1) AND CLJU_c40570(1)
CPLX-352	CLJU_c42100(2) AND CLJU_c42110(1) AND CLJU_c42120(1) AND CLJU_c42140(1)
CPLX-353	CLJU_c13100(1)
CPLX-354	CLJU_c11500(2)
CPLX-355	CLJU_c33530(1)
CPLX-356	CLJU_c05340(1)
CPLX-357	CLJU_c05570(1)
CPLX-358	CLJU_c26660(1)
CPLX-359	CLJU_c39500(2)
CPLX-360	CLJU_c09080(2)
CPLX-361	CLJU_c13060(2)
CPLX-362	CLJU_c35470(1)
CPLX-363	CLJU_c00710(1)
CPLX-364	CLJU_c07160(1)
CPLX-365	CLJU_c21320(1)
CPLX-366	CLJU_c20030(1) AND CLJU_c20040(1)
CPLX-367	CLJU_c06990(1)
CPLX-368	CLJU_c08930(1)
CPLX-369	CLJU_c21510(2)
CPLX-370	CLJU_c22060(1)
CPLX-371	CLJU_c37630(2)
CPLX-372	CLJU_c11720(2)
CPLX-373	CLJU_c39150(1)
CPLX-374	CLJU_c13400(1)
CPLX-375	CLJU_c24430(1)
CPLX-376	CLJU_c23710(1) AND CLJU_c23720(1) AND CLJU_c23730(1)
CPLX-377	CLJU_c17710(1)
CPLX-378	CLJU_c26720(1)
CPLX-379	CLJU_c11750(1)
CPLX-380	CLJU_c29390(1)
Asr2_CPLX	CLJU_c25470(1) AND CLJU_c25480(1)
CPLX-382	CLJU_c29160(1)
CPLX-383	CLJU_c21530(2)
CPLX-384	CLJU_c04820(1)
CPLX-385	CLJU_c31080(1)
CPLX-386	CLJU_c01880(1)
CPLX-387	CLJU_c40480(1)
CPLX-388	CLJU_c28090(1)
CPLX-389	CLJU_c28760(2)
CPLX-390	CLJU_c21520(1)
CPLX-391	CLJU_c21460(1)
CPLX-392	CLJU_c32840(1)
CPLX-393	CLJU_c00660(1)
CPLX-394	CLJU_c12520(1)
CPLX-395	CLJU_c02810(1)
CPLX-396	CLJU_c21650(1) AND CLJU_c21660(1)
CPLX-397	CLJU_c13960(1) AND CLJU_c13980(1)
CPLX-398	CLJU_c37390(1)
CPLX-399	CLJU_c29170(1)
CPLX-400	CLJU_c35710(1)
CPLX-401	CLJU_c35870(1)
CPLX-402	CLJU_c31950(1)
CPLX-403	CLJU_c01570(3)
CPLX-404	CLJU_c13370(1)
CPLX-405	CLJU_c07460(1)
CPLX-406	CLJU_c27720(1)
CPLX-407	CLJU_c16090(2)
CPLX-408	CLJU_c11180(1)
CPLX-409	CLJU_c41520(2)
CPLX-410	CLJU_c02460(1)
CPLX-411	CLJU_c41980(1)
CPLX-412	CLJU_c23960(1)
CODH_AC_SYN	CLJU_c37550(1) AND CLJU_c37570(1) AND CLJU_c37580(1) AND CLJU_c37670(1) AND CLJU_c37590(1) AND CLJU_c37660(1)
CPLX-414	CLJU_c24410(1)
CPLX-415	CLJU_c38070(1)
CPLX-416	CLJU_c25410(1)
CPLX-417	CLJU_c06710(1)
CPLX-418	CLJU_c02200(4)
CPLX-419	CLJU_c32780(1)
CPLX-420	CLJU_c00970(1)
CPLX-421	CLJU_c03860(1)
CPLX-422	CLJU_c11580(1)
CPLX-423	CLJU_c11620(1)
CPLX-424	CLJU_c30610(1)
CPLX-425	CLJU_c25960(1)
CPLX-426	CLJU_c39640(1)
CPLX-427	CLJU_c08580(1)
CPLX-428	CLJU_c41810(1)
CPLX-429	CLJU_c06700(4)
CPLX-430	CLJU_c34190(1)
CPLX-431	CLJU_c04510(1)
CPLX-432	CLJU_c24330(1)
CPLX-433	CLJU_c41780(3)
CPLX-434	CLJU_c06610(1)
CPLX-435	CLJU_c10580(1)
CPLX-436	CLJU_c24420(1)
CPLX-437	CLJU_c42660(1) AND CLJU_c42670(1)
CPLX-438	CLJU_c04040(1)
CPLX-439	CLJU_c20210(1)
CPLX-440	CLJU_c20110(1)
CPLX-441	CLJU_c11610(1)
CPLX-442	CLJU_c37290(2)
CPLX-443	CLJU_c01840(1)
Rnf_CPLX	CLJU_c11360(1) AND CLJU_c11370(1) AND CLJU_c11380(1) AND CLJU_c11390(1) AND CLJU_c11400(1) AND CLJU_c11410(1)
CPLX-445	CLJU_c10470(1)
CPLX-446	CLJU_c05330(1)
CPLX-447	CLJU_c05560(1)
Met_RS_dim	CLJU_c01730(2)
CPLX-449	CLJU_c27940(1)
CPLX-450	CLJU_c19220(1)
CPLX-451	CLJU_c18150(1)
CPLX-452	CLJU_c02320(1)
CPLX-453	CLJU_c10740(2)
CPLX-454	CLJU_c21800(1)
HemN_mono	CLJU_c07950(1)
CPLX-456	CLJU_c09050(4)
GalE_mono	CLJU_c21710(1)
CPLX-458	CLJU_c16130(2)
CPLX-459	CLJU_c28280(1)
CPLX-460	CLJU_c32110(1)
CPLX-461	CLJU_c13620(1)
Nfn_CPLX	CLJU_c37240(1)
CPLX-463	CLJU_c09340(1)
CPLX-464	CLJU_c29340(1)
CPLX-465	CLJU_c10700(1)
CPLX-466	CLJU_c00960(1)
CPLX-467	CLJU_c41950(1)
CPLX-468	CLJU_c28170(1)
CPLX-469	CLJU_c28130(1)
CPLX-470	CLJU_c15340(1)
CPLX-471	CLJU_c15330(4)
CPLX-472	CLJU_c02310(1)
CPLX-473	CLJU_c28100(1)
CPLX-474	CLJU_c12720(6)
CPLX-475	CLJU_c06370(1)
CPLX-476	CLJU_c24470(1)
CPLX-477	CLJU_c06920(1)
CPLX-478	CLJU_c03050(1) AND CLJU_c03060(1)
CPLX-479	CLJU_c25820(1) AND CLJU_c25830(1)
CPLX-480	CLJU_c07250(1)
CPLX-481	CLJU_c27810(1)
CPLX-482	CLJU_c40490(1)
CPLX-483	CLJU_c21470(1)
CPLX-484	CLJU_c06840(1)
CPLX-485	CLJU_c16110(1)
CPLX-486	CLJU_c06650(1)
LeuS_mono	CLJU_c02750(1)
CPLX-488	CLJU_c39300(1)
CPLX-489	CLJU_c41940(1)
CPLX-490	CLJU_c21930(1)
CPLX-491	CLJU_c02330(1)
CPLX-492	CLJU_c09270(1)
CPLX-493	CLJU_c39120(1)
CPLX-494	CLJU_c11960(1)
CPLX-495	CLJU_c26570(1)
CPLX-496	CLJU_c01210(1)
CPLX-497	CLJU_c05990(1)
CPLX-498	CLJU_c29110(1)
CPLX-499	CLJU_c01980(1)
CPLX-500	CLJU_c11570(1)
CPLX-501	CLJU_c18250(1)
CPLX-502	CLJU_c10590(1)
CPLX-503	CLJU_c29140(4)
CPLX-504	CLJU_c35530(1)
CPLX-505	CLJU_c21540(1)
CPLX-506	CLJU_c32120(1)
CPLX-507	CLJU_c40390(1)
CPLX-508	CLJU_c12010(1)
CPLX-509	CLJU_c30500(1)
CPLX-510	CLJU_c25360(1)
CPLX-511	CLJU_c11830(1) AND CLJU_c11840(1)
CPLX-512	CLJU_c25970(1) AND CLJU_c25980(1)
CPLX-513	CLJU_c39820(1) AND CLJU_c39830(1)
CPLX-514	CLJU_c04160(1)
CPLX-515	CLJU_c38460(1)
CPLX-516	CLJU_c02660(1)
CPLX-517	CLJU_c42580(1)
CPLX-518	CLJU_c23940(1)
CPLX-519	CLJU_c26120(1)
CPLX-520	CLJU_c29900(1)
CPLX-521	CLJU_c15120(2)
CPLX-522	CLJU_c37640(1)
CPLX-523	CLJU_c16120(2)
CPLX-524	CLJU_c29050(1)
CPLX-525	CLJU_c02360(1) AND CLJU_c02370(1) AND CLJU_c02380(1) AND CLJU_c02390(2) AND CLJU_c02400(1) AND CLJU_c02410(3) AND CLJU_c02420(1) AND CLJU_c02430(3) AND CLJU_c02440(1)
CPLX-526	CLJU_c10620(1)
CPLX-527	CLJU_c32000(1)
CPLX-528	CLJU_c35060(1)
CPLX-529	CLJU_c33050(1)
CPLX-530	CLJU_c27610(1)
CPLX-531	CLJU_c21480(1)
CPLX-532	CLJU_c23150(1)
CPLX-533	CLJU_c00680(1)
CPLX-534	CLJU_c34570(2)
CPLX-535	CLJU_c23850(1)
CPLX-536	CLJU_c15130(1)
CPLX-537	CLJU_c07400(1)
CPLX-538	CLJU_c35540(1)
CPLX-539	CLJU_c23220(1)
CPLX-540	CLJU_c21310(2)
CPLX-541	CLJU_c08550(1)
CPLX-542	CLJU_c17370(1) AND CLJU_c17380(1)
CPLX-543	CLJU_c04750(1) AND CLJU_c04760(1)
CPLX-544	CLJU_c21450(1)
CPLX-545	CLJU_c28050(1)
CPLX-546	CLJU_c34100(1)
Asr1_CPLX	CLJU_c23750(1) AND CLJU_c23760(1) AND CLJU_c23770(1)
CPLX-548	CLJU_c24180(1)
CPLX-549	CLJU_c29780(1)
CPLX-550	CLJU_c36000(1)
CPLX-551	CLJU_c09130(1)
CPLX-552	CLJU_c02970(1)
CPLX-553	CLJU_c15990(1)
CPLX-554	CLJU_c21890(1)
CPLX-555	CLJU_c33600(1)
CPLX-556	CLJU_c10090(1)
CPLX-557	CLJU_c07150(1)
CPLX-558	CLJU_c23550(1)
CPLX-559	CLJU_c02580(4)
CPLX-560	CLJU_c36010(1) AND CLJU_c36020(1)
IleS_mono	CLJU_c01890(1)
CPLX-562	CLJU_c06210(1)
CPLX-563	CLJU_c40420(2)
CPLX-564	CLJU_c02110(1)
CysS_mono	CLJU_c20850(1)
CysSII_mono	CLJU_c41270(1)
Trp_RS_dim	CLJU_c38290(2)
Lys_RS_dim	CLJU_c41480(2)
AlaS_mono	CLJU_c12150(1)
Gly_RS_dim	CLJU_c41460(2)
Tyr_RS_dim	CLJU_c34300(2)
TyrII_RS_dim	CLJU_c38210(2)
Thr_RS_dim	CLJU_c34470(2)
Asp_RS_dim	CLJU_c33660(2)
Pro_RS_dim	CLJU_c38360(2)
Asn_RS_dim	CLJU_c42030(2)
AsnII_RS_dim	CLJU_c06740(2)
Phe_RS_tetra	CLJU_c34410(2) AND CLJU_c34420(2)
ArgS_mono	CLJU_c21700(1)
GlnS_mono	CLJU_c26740(1)
His_RS_dim	CLJU_c33670(2)
MiaA_mono	CLJU_c21220(1)
MiaB_mono	CLJU_c21250(1)
TadA_dim	CLJU_c00760(2)
CLJU_c01470_mono	CLJU_c01470(1)
CLJU_c11280_mono	CLJU_c11280(1)
CLJU_c01520_mono	CLJU_c01520(1)
MtaB_mono	CLJU_c08020(1)
TsaC_mono	CLJU_c02290(1)
TsaCII_mono	CLJU_c26950(1)
TsaEBD_CPLX	CLJU_c37400(1) AND CLJU_c38180(1) AND CLJU_c38190(1)
TrmD_dim	CLJU_c12920(2)
TruB_mono	CLJU_c13180(1)
MnmA_mono	CLJU_c23380(1)
TrmB_dim	CLJU_c29660(2)
Tgt_hex	CLJU_c33800(6)
QueG_mono	CLJU_c32750(1)
QueGII_mono	CLJU_c26330(1)
QueA_mono	CLJU_c33810(1)
TrmDII_dim	CLJU_c35670(2)
TrmL_dim	CLJU_c39190(2)
TruA_dim	CLJU_c40720(2)
DnaJ_dim	CLJU_c07990(2)
DnaJII_dim	CLJU_c02780(2)
PrsA_mono	CLJU_c01180(1)
PrsAII_mono	CLJU_c41710(1)
RsuA_mono	CLJU_c37000(1)
GidB_mono	CLJU_c42900(1)
RsmD_mono	CLJU_c12710(1)
RsmB_mono	CLJU_c12590(1)
DusI_mono	CLJU_c38790(1)
DusII_mono	CLJU_c41510(1)
RsmH_mono	CLJU_c10540(1)
RsmI_mono	CLJU_c01480(1)
RsmE_mono	CLJU_c08010(1)
RsmA_mono	CLJU_c01770(1)
RluC_mono	CLJU_c17350(1)
RluD_mono	CLJU_c10720(1)
RlmH_dim	CLJU_c17400(2)
RlmB_mono	CLJU_c41250(1)
RlmN_mono	CLJU_c12600(1)
RluB_mono	CLJU_c21360(1)
RimJ_mono	CLJU_c00990(1)
RnmV_mono	CLJU_c01760(1)
PrmC_mono	CLJU_c02250(1)
PrfA_mono	CLJU_c02260(1)
PrfB_mono	CLJU_c02640(1)
PrfC_mono	CLJU_c38280(1)
Era_mono	CLJU_c08100(1)
Def_mono	CLJU_c12560(1)
DefII_mono	CLJU_c13640(1)
DefIII_mono	CLJU_c16270(1)
DefIV_mono	CLJU_c17840(1)
DefV_mono	CLJU_c21960(1)
SecA_mono	CLJU_c02630(1)
Sec_cplx	CLJU_c33740(1) AND CLJU_c33750(1) AND CLJU_c39100(1) AND CLJU_c40840(1) AND CLJU_c41180(1)
FtsY_mono	CLJU_c12860(1)
SRP_cplx	CLJU_c12880(1) AND CLJU_c41670(1)
RimM_mono	CLJU_c12910(1)
RbgA_mono	CLJU_c12950(1)
Tsf_mono	CLJU_c13030(1)
Frr_mono	CLJU_c13050(1)
InfB_mono	CLJU_c13150(1)
RbfA_mono	CLJU_c13160(1)
InfC_mono	CLJU_c20760(1)
InfCII_mono	CLJU_c34460(1)
Map_mono	CLJU_c35780(1)
RimI_mono	CLJU_c38200(1)
InfA_mono	CLJU_c40820(1)
Tuf_mono	CLJU_c41060(1)
TufII_mono	CLJU_c41200(1)
FusA_mono	CLJU_c41070(1)
MnmEG_cplx	CLJU_c42910(2) AND CLJU_c42920(2)
Pps_dim	CLJU_c14340(2)
PpsII_dim	CLJU_c38600(2)
GreA_mono	CLJU_c26390(1)
GreAII_mono	CLJU_c35450(1)
GreAIII_mono	CLJU_c41490(1)
Tig_mono	CLJU_c35650(1)
Frr_mono	CLJU_c13050(1)
RNase_Z	CLJU_c26640(2)
RNase_P	CLJU_c42960(1)
RpoD_mono	CLJU_c08220(1)
Hpr_dim	CLJU_c11620(2)
CLJU_c21640_mono	CLJU_c21640(1)
LplA_mono	CLJU_c09210(1)
LplAII_mono	CLJU_c33220(1)
MoaA_mono_MoaC_mono	CLJU_c33380(1) AND CLJU_c25050(1)
MobA_mono	CLJU_c21410(1)
MoeA_dim	CLJU_c07000(2)
MoeAII_dim	CLJU_c17110(2)
MoeAIII_dim	CLJU_c20170(2)
MoeAIV_dim	CLJU_c20180(2)
CLJU_c17950_mono	CLJU_c17950(1)
NfrA_dim	CLJU_c26350(2)
ACP_c	CLJU_c12820(1)
TrxA_mono	CLJU_c40500(1)
TrxAII_mono	CLJU_c27800(1)
TrxAIII_mono	CLJU_c27320(1)
NifU_dim	CLJU_c12120(2)
IscS_dim	CLJU_c12110(2)
SufBC_CPLX	CLJU_c26900(1) AND CLJU_c26910(1)
SufBCII_CPLX	CLJU_c37930(1) AND CLJU_c37940(1)
IscSII_dim	CLJU_c23390(1)
ErpA_dim	CLJU_c28340(2)
ECF_CPLX_QueT	CLJU_c40730(1) AND CLJU_c40740(1) AND CLJU_c40750(1) AND CLJU_c18230(1)
Transcription_normal_rho_independent_I	CLJU_c41720(1) AND CLJU_c13120(1) AND CLJU_c41170(1) AND CLJU_c26390(1) AND CLJU_c12530(1)
Transcription_normal_rho_independent_II	CLJU_c41720(1) AND CLJU_c13120(1) AND CLJU_c41170(1) AND CLJU_c35450(1) AND CLJU_c12530(1)
Transcription_normal_rho_independent_III	CLJU_c41720(1) AND CLJU_c13120(1) AND CLJU_c41170(1) AND CLJU_c41490(1) AND CLJU_c12530(1)
Transcription_normal_rho_dependent_I	CLJU_c41720(1) AND CLJU_c13120(1) AND CLJU_c41170(1) AND CLJU_c26390(1) AND CLJU_c12530(1) AND CLJU_c02220(6)
Transcription_normal_rho_dependent_II	CLJU_c41720(1) AND CLJU_c13120(1) AND CLJU_c41170(1) AND CLJU_c35450(1) AND CLJU_c12530(1) AND CLJU_c02220(6)
Transcription_normal_rho_dependent_III	CLJU_c41720(1) AND CLJU_c13120(1) AND CLJU_c41170(1) AND CLJU_c41490(1) AND CLJU_c12530(1) AND CLJU_c02220(6)
Transcription_stable_rho_independent_I	CLJU_c41720(1) AND CLJU_c13120(1) AND CLJU_c41170(1) AND CLJU_c26390(1) AND CLJU_c12530(1) AND CLJU_c41050(1) AND CLJU_c40780(1) AND CLJU_c41040(1) AND CLJU_c41030(1) AND CLJU_c40710(1) AND CLJU_c11120(1)
Transcription_stable_rho_independent_II	CLJU_c41720(1) AND CLJU_c13120(1) AND CLJU_c41170(1) AND CLJU_c35450(1) AND CLJU_c12530(1) AND CLJU_c41050(1) AND CLJU_c40780(1) AND CLJU_c41040(1) AND CLJU_c41030(1) AND CLJU_c40710(1) AND CLJU_c11120(1)
Transcription_stable_rho_independent_III	CLJU_c41720(1) AND CLJU_c13120(1) AND CLJU_c41170(1) AND CLJU_c41490(1) AND CLJU_c12530(1) AND CLJU_c41050(1) AND CLJU_c40780(1) AND CLJU_c41040(1) AND CLJU_c41030(1) AND CLJU_c40710(1) AND CLJU_c11120(1)
Transcription_stable_rho_dependent_I	CLJU_c41720(1) AND CLJU_c13120(1) AND CLJU_c41170(1) AND CLJU_c26390(1) AND CLJU_c12530(1) AND CLJU_c41050(1) AND CLJU_c40780(1) AND CLJU_c41040(1) AND CLJU_c41030(1) AND CLJU_c40710(1) AND CLJU_c11120(1) AND CLJU_c02220(6)
Transcription_stable_rho_dependent_II	CLJU_c41720(1) AND CLJU_c13120(1) AND CLJU_c41170(1) AND CLJU_c35450(1) AND CLJU_c12530(1) AND CLJU_c41050(1) AND CLJU_c40780(1) AND CLJU_c41040(1) AND CLJU_c41030(1) AND CLJU_c40710(1) AND CLJU_c11120(1) AND CLJU_c02220(6)
Transcription_stable_rho_dependent_III	CLJU_c41720(1) AND CLJU_c13120(1) AND CLJU_c41170(1) AND CLJU_c41490(1) AND CLJU_c12530(1) AND CLJU_c41050(1) AND CLJU_c40780(1) AND CLJU_c41040(1) AND CLJU_c41030(1) AND CLJU_c40710(1) AND CLJU_c11120(1) AND CLJU_c02220(6)
YgeX_dim	CLJU_c23860(2)
CysK_mono	CLJU_c08270(1)
CLJU_c18870_mono	CLJU_c18870(1)
ThiN_mono	CLJU_c12650(1)
Ca2_ATP	CLJU_c06890(1)
Ca2_ATPII	CLJU_c07870(1)
Ca2_ATPIII	CLJU_c10480(1)
NiAB_CPLX	CLJU_c22600(2) AND CLJU_c22540(1)
NiMNQ_CbiO_CPLX	CLJU_c32040(1) AND CLJU_c33200(1) AND CLJU_c32030(1)
CbiMOQ_CPLX	CLJU_c32030(1) AND CLJU_c22230(1) AND CLJU_c28600(1)
PanF_mono	CLJU_c32870(1)
PDX5PO_CPLX	CLJU_c37110(1)
CopA_mono	CLJU_c24900(1)
ZupT_mono	CLJU_c02280(1)
GLCt_mono	CLJU_c23180(1)
Gln_CPLX	CLJU_c06680(1) AND CLJU_c06690(1)
MetNIQ_CPLX	CLJU_c06280(1) AND CLJU_c06290(1) AND CLJU_c06300(1)
PduX_mono	CLJU_c31830(1)
Fdx	CLJU_c00930(1)
FdxII	CLJU_c01440(1)
FdxIII	CLJU_c01820(1)
FdxIV	CLJU_c17980(1)
Mop_mono	CLJU_c24050(1)
MopII_mono	CLJU_c24130(1)
CLJU_c24250_mono	CLJU_c24250(1)
AcsCD_CPLX	CLJU_c37370(1) AND CLJU_c37580(1)
CPLX-271	CLJU_c37560(1)
CPLX_dummy
CPLX_dummy_membrane
RNA_Polymerase
ribosome

## Sheet: Table 2
Protein complex with modifications	Protein complex	Modifications(stoichiometry)
CPLX-15_mod_1:4fe4s_mod_1:ni2	CPLX-15	4fe4s(1) AND ni2(1)
CPLX-18_mod_1:mg2	CPLX-18	mg2(1)
CPLX-27_mod_1:2fe2s_mod_1:ni2	CPLX-27	2fe2s(1) AND ni2(1)
Hyp_CPLX_mod_1:zn2	Hyp_CPLX	zn2(1)
CPLX-28_mod_1:pydx5p	CPLX-28	pydx5p(1)
Etf3_CPLX_mod_1:fad	Etf3_CPLX	fad(1)
CPLX-30_mod_1:fmn	CPLX-30	fmn(1)
CPLX-31_mod_1:mg2_mod_1:thmpp	CPLX-31	mg2(1) AND thmpp(1)
CPLX-32_mod_1:mg2_mod_1:thmpp	CPLX-32	mg2(1) AND thmpp(1)
CPLX-33_mod_1:mg2_mod_1:thmpp	CPLX-33	mg2(1) AND thmpp(1)
CPLX-39_mod_1:nad	CPLX-39	nad(1)
CPLX-40_mod_1:nad	CPLX-40	nad(1)
CPLX-46_mod_1:zn2	CPLX-46	zn2(1)
CPLX-60_mod_2:mg2_mod_2:thmpp	CPLX-60	mg2(2) AND thmpp(2)
CPLX-61_mod_2:mg2_mod_2:thmpp	CPLX-61	mg2(2) AND thmpp(2)
CPLX-62_mod_2:mg2_mod_2:thmpp	CPLX-62	mg2(2) AND thmpp(2)
CPLX-65_mod_1:pydx5p	CPLX-65	pydx5p(1)
CPLX-66_mod_1:pydx5p	CPLX-66	pydx5p(1)
CPLX-75_mod_2:mn2	CPLX-75	mn2(2)
CPLX-82_mod_1:4fe4s	CPLX-82	4fe4s(1)
CPLX-83_mod_1:4fe4s	CPLX-83	4fe4s(1)
CPLX-84_mod_1:4fe4s	CPLX-84	4fe4s(1)
CPLX-90_mod_1:dpm	CPLX-90	dpm(1)
FolE_CPLX_mod_1:zn2	FolE_CPLX	zn2(1)
CPLX-102_mod_1:4fe4s	CPLX-102	4fe4s(1)
CPLX-106_mod_1:ca2	CPLX-106	ca2(1)
CPLX-107_mod_1:fe2	CPLX-107	fe2(1)
CPLX-108_mod_1:fe2	CPLX-108	fe2(1)
CPLX-115_mod_1:pydx5p	CPLX-115	pydx5p(1)
CPLX-116_mod_1:4fe4s	CPLX-116	4fe4s(1)
CPLX-122_mod_1:fad	CPLX-122	fad(1)
CPLX-125_mod_1:4fe4s	CPLX-125	4fe4s(1)
CPLX-126_mod_1:4fe4s	CPLX-126	4fe4s(1)
CPLX-127_mod_1:4fe4s	CPLX-127	4fe4s(1)
CPLX-128_mod_1:4fe4s	CPLX-128	4fe4s(1)
CPLX-129_mod_1:4fe4s	CPLX-129	4fe4s(1)
CPLX-130_mod_1:4fe4s	CPLX-130	4fe4s(1)
CPLX-131_mod_1:4fe4s	CPLX-131	4fe4s(1)
CPLX-132_mod_1:4fe4s	CPLX-132	4fe4s(1)
CPLX-134_mod_1:mg2	CPLX-134	mg2(1)
CPLX-138_mod_1:pydx5p	CPLX-138	pydx5p(1)
CPLX-149_mod_1:fe2	CPLX-149	fe2(1)
CPLX-150_mod_1:fe2	CPLX-150	fe2(1)
CPLX-159_mod_1:4fe4s_mod_1:mg2	CPLX-159	4fe4s(1) AND mg2(1)
CPLX-172_mod_1:fmn_mod_2:2fe2s_mod_2:fad	CPLX-172	fmn(1) AND 2fe2s(2) AND fad(2)
CPLX-182_mod_2:fe2	CPLX-182	fe2(2)
CPLX-184_mod_1:pydx5p	CPLX-184	pydx5p(1)
CPLX-185_mod_1:pydx5p	CPLX-185	pydx5p(1)
CPLX-186_mod_1:mg2	CPLX-186	mg2(1)
CPLX-189_mod_1:4fe4s_mod_1:4fe2o2s	CPLX-189	4fe4s(1) AND 4fe2o2s(1)
CPLX-190_mod_1:4fe4s_mod_1:4fe2o2s	CPLX-190	4fe4s(1) AND 4fe2o2s(1)
CPLX-198_mod_1:mn2	CPLX-198	mn2(1)
CPLX-207_mod_1:k	CPLX-207	k(1)
CPLX-209_mod_1:pydx5p	CPLX-209	pydx5p(1)
CPLX-210_mod_1:pydx5p	CPLX-210	pydx5p(1)
CPLX-219_mod_1:pydx5p	CPLX-219	pydx5p(1)
CPLX-231_mod_1:thmpp	CPLX-231	thmpp(1)
CPLX-242_mod_1:zn2	CPLX-242	zn2(1)
CPLX-245_mod_1:mg2	CPLX-245	mg2(1)
CPLX-248_mod_1:mg2	CPLX-248	mg2(1)
CPLX-250_mod_1:pydx5p_mod_1:fad_mod_1:lipo	CPLX-250	pydx5p(1) AND fad(1) AND lipo(1)
CPLX-251_mod_1:pydx5p_mod_1:fad_mod_1:lipo	CPLX-251	pydx5p(1) AND fad(1) AND lipo(1)
CPLX-252_mod_1:pydx5p	CPLX-252	pydx5p(1)
CPLX-256_mod_1:fad_mod_1:2fe2s	CPLX-256	fad(1) AND 2fe2s(1)
CPLX-259_mod_2:mg2	CPLX-259	mg2(2)
CPLX-260_mod_1:mg2	CPLX-260	mg2(1)
CPLX-261_Etf1_CPLX_mod_1:fmn_mod_1:fad	CPLX-261_Etf1_CPLX	fmn(1) AND fad(1)
CPLX-261_Etf2_CPLX_mod_1:fmn_mod_1:fad	CPLX-261_Etf2_CPLX	fmn(1) AND fad(1)
CPLX-261_Etf3_CPLX_mod_1:fmn_mod_1:fad	CPLX-261_Etf3_CPLX	fmn(1) AND fad(1)
CPLX-268_mod_1:pydx5p	CPLX-268	pydx5p(1)
RibBA_mono_mod_1:zn2	RibBA_mono	zn2(1)
CPLX-277_mod_1:pydx5p	CPLX-277	pydx5p(1)
CPLX-280_mod_1:pydx5p_mod_1:fad_mod_1:lipo	CPLX-280	pydx5p(1) AND fad(1) AND lipo(1)
CPLX-281_mod_1:pydx5p_mod_1:fad_mod_1:lipo	CPLX-281	pydx5p(1) AND fad(1) AND lipo(1)
CPLX-282_mod_1:zn2	CPLX-282	zn2(1)
CPLX-283_mod_1:mn2	CPLX-283	mn2(1)
CPLX-284_mod_2:mn2	CPLX-284	mn2(2)
CPLX-288_mod_1:mg2	CPLX-288	mg2(1)
CPLX-293_mod_1:mg2	CPLX-293	mg2(1)
NADH-DHI-CPLX_FdhA_mono_mod_1:fmn_mod_1:2fe2s_mod_1:4fe4s_mod_1:bmocogdp	NADH-DHI-CPLX_FdhA_mono	fmn(1) AND 2fe2s(1) AND 4fe4s(1) AND bmocogdp(1)
NADH-DHI-CPLX_FdhAII_mono_mod_1:fmn_mod_1:2fe2s_mod_1:4fe4s_mod_1:bmocogdp	NADH-DHI-CPLX_FdhAII_mono	fmn(1) AND 2fe2s(1) AND 4fe4s(1) AND bmocogdp(1)
NADH-DHI-CPLX_FdhAIII_mono_mod_1:fmn_mod_1:2fe2s_mod_1:4fe4s_mod_1:bmocogdp	NADH-DHI-CPLX_FdhAIII_mono	fmn(1) AND 2fe2s(1) AND 4fe4s(1) AND bmocogdp(1)
NADH-DHI-II-CPLX_FdhA_mono_mod_1:fmn_mod_1:2fe2s_mod_1:4fe4s_mod_1:bmocogdp	NADH-DHI-II-CPLX_FdhA_mono	fmn(1) AND 2fe2s(1) AND 4fe4s(1) AND bmocogdp(1)
NADH-DHI-II-CPLX_FdhAII_mono_mod_1:fmn_mod_1:2fe2s_mod_1:4fe4s_mod_1:bmocogdp	NADH-DHI-II-CPLX_FdhA_mono	fmn(1) AND 2fe2s(1) AND 4fe4s(1) AND bmocogdp(1)
NADH-DHI-II-CPLX_FdhAIII_mono_mod_1:fmn_mod_1:2fe2s_mod_1:4fe4s_mod_1:bmocogdp	NADH-DHI-II-CPLX_FdhA_mono	fmn(1) AND 2fe2s(1) AND 4fe4s(1) AND bmocogdp(1)
NADH-DHI-CPLX_mod_1:fmn_mod_1:2fe2s_mod_1:4fe4s	NADH-DHI-CPLX	fmn(1) AND 2fe2s(1) AND 4fe4s(1)
NADH-DHI-II-CPLX_mod_1:fmn_mod_1:2fe2s_mod_1:4fe4s	NADH-DHI-II-CPLX	fmn(1) AND 2fe2s(1) AND 4fe4s(1)
CPLX-314_mod_1:mg2	CPLX-314	mg2(1)
CPLX-315_mod_1:mg2	CPLX-315	mg2(1)
CPLX-317_mod_1:pydx5p	CPLX-317	pydx5p(1)
CPLX-318_mod_1:zn2	CPLX-318	zn2(1)
CPLX-352_mod_1:zn2	CPLX-352	zn2(1)
CPLX-353_mod_1:4fe4s	CPLX-353	4fe4s(1)
CPLX-354_mod_1:pydx5p	CPLX-354	pydx5p(1)
CPLX-359_mod_1:mg2	CPLX-359	mg2(1)
CPLX-360_mod_1:mg2	CPLX-360	mg2(1)
CPLX-361_mod_1:mg2	CPLX-361	mg2(1)
CPLX-363_mod_1:pyruvoyl	CPLX-363	pyruvoyl(1)
CPLX-365_mod_1:3fe4s	CPLX-365	3fe4s(1)
CPLX-366_mod_1:4fe4s_mod_1:bmocogdp	CPLX-366	4fe4s(1) AND bmocogdp(1)
CPLX-367_mod_1:4fe4s_mod_1:bmocogdp	CPLX-367	4fe4s(1) AND bmocogdp(1)
CPLX-368_mod_1:4fe4s_mod_1:bmocogdp	CPLX-368	4fe4s(1) AND bmocogdp(1)
CPLX-369_mod_1:pydx5p	CPLX-369	pydx5p(1)
CPLX-372_mod_1:pydx5p	CPLX-372	pydx5p(1)
CPLX-375_mod_1:4fe4s	CPLX-375	4fe4s(1)
CPLX-376_mod_1:bmocogdp	CPLX-376	bmocogdp(1)
CPLX-380_mod_1:pydx5p	CPLX-380	pydx5p(1)
Asr2_CPLX_mod_1:fad_mod_1:2fe2s	Asr2_CPLX	fad(1) AND 2fe2s(1)
CPLX-398_mod_1:btn	CPLX-398	btn(1)
CPLX-405_mod_1:mg2	CPLX-405	mg2(1)
CPLX-406_mod_1:mg2	CPLX-406	mg2(1)
CPLX-407_mod_4:mg2	CPLX-407	mg2(4)
CPLX-408_mod_1:mg2	CPLX-408	mg2(1)
CPLX-409_mod_1:nh4	CPLX-409	nh4(1)
CODH_AC_SYN_mod_2:4fe4s_mod_3:ni2	CODH_AC_SYN	4fe4s(2) AND ni2(3)
CPLX-433_mod_1:mg2	CPLX-433	mg2(1)
CPLX-439_mod_1:2fe2s	CPLX-439	2fe2s(1)
CPLX-440_mod_1:2fe2s	CPLX-440	2fe2s(1)
CPLX-442_mod_2:zn2	CPLX-442	zn2(2)
Rnf_CPLX_mod_1:fmn_mod_2:4fe4s	Rnf_CPLX	fmn(1) AND 4fe4s(2)
CPLX-445_mod_1:mn2	CPLX-445	mn2(1)
CPLX-451_mod_1:mn2	CPLX-451	mn2(1)
HemN_mono_mod_1:2fe2s	HemN_mono	2fe2s(1)
CPLX-459_mod_1:zn2	CPLX-459	zn2(1)
Nfn_CPLX_mod_1:fad_mod_1:2fe2s	Nfn_CPLX	fad(1) AND 2fe2s(1)
CPLX-463_mod_3:4fe4s	CPLX-463	4fe4s(3)
CPLX-464_mod_3:4fe4s	CPLX-464	4fe4s(3)
CPLX-470_mod_1:zn2	CPLX-470	zn2(1)
CPLX-471_mod_8:zn2	CPLX-471	zn2(8)
CPLX-481_mod_1:fad	CPLX-481	fad(1)
CPLX-490_mod_2:mn2	CPLX-490	mn2(2)
CPLX-491_mod_1:zn2	CPLX-491	zn2(1)
CPLX-493_mod_2:mn2	CPLX-493	mn2(2)
CPLX-495_mod_1:zn2	CPLX-495	zn2(1)
CPLX-498_mod_1:mg2	CPLX-498	mg2(1)
CPLX-503_mod_1:fmnh2	CPLX-503	fmnh2(1)
CPLX-506_mod_1:pydx5p	CPLX-506	pydx5p(1)
CPLX-507_mod_1:pydx5p	CPLX-507	pydx5p(1)
CPLX-508_mod_1:pydx5p	CPLX-508	pydx5p(1)
CPLX-511_mod_1:4fe4s	CPLX-511	4fe4s(1)
CPLX-512_mod_1:4fe4s	CPLX-512	4fe4s(1)
CPLX-513_mod_1:4fe4s	CPLX-513	4fe4s(1)
CPLX-518_mod_1:mn2	CPLX-518	mn2(1)
CPLX-519_mod_1:mn2	CPLX-519	mn2(1)
CPLX-520_mod_1:mn2	CPLX-520	mn2(1)
CPLX-523_mod_1:pydx5p	CPLX-523	pydx5p(1)
CPLX-524_mod_1:mn2	CPLX-524	mn2(1)
CPLX-528_mod_1:mg2	CPLX-528	mg2(1)
CPLX-529_mod_1:mg2	CPLX-529	mg2(1)
CPLX-531_mod_1:nad	CPLX-531	nad(1)
CPLX-539_mod_1:zn2	CPLX-539	zn2(1)
CPLX-540_mod_1:pyruvoyl	CPLX-540	pyruvoyl(1)
Asr1_CPLX_mod_1:4fe4s	Asr1_CPLX	4fe4s(1)
CPLX-559_mod_2:mg2_mod_1:k	CPLX-559	mg2(2) AND k(1)
IleS_mono_mod_1:zn2	IleS_mono	zn2(1)
CPLX-562_mod_1:mn2	CPLX-562	mn2(1)
CysS_mono_mod_1:zn2	CysS_mono	zn2(1)
CysSII_mono_mod_1:zn2	CysSII_mono	zn2(1)
Lys_RS_dim_mod_6:mg2	Lys_RS_dim	mg2(6)
AlaS_mono_mod_1:zn2	AlaS_mono	zn2(1)
Thr_RS_dim_mod_2:zn2	Thr_RS_dim	zn2(2)
Phe_RS_tetra_mod_2:mg2	Phe_RS_tetra	mg2(2)
Met_RS_dim_mod_2:zn2	Met_RS_dim	zn2(2)
MiaA_mono_mod_1:mg2	MiaA_mono	mg2(1)
MiaB_mono_mod_2:4fe4s	MiaB_mono	4fe4s(2)
TadA_dim_mod_2:zn2	TadA_dim	zn2(2)
MtaB_mono_mod_2:4fe4s	MtaB_mono	4fe4s(2)
TsaEBD_CPLX_mod_1:fe2	TsaEBD_CPLX	fe2(1)
TrmB_dim_mod_1:k	TrmB_dim	k(1)
Tgt_hex_mod_6:zn2	Tgt_hex	zn2(6)
QueG_mono_mod_2:4fe4s_mod_1:adocbl	QueG_mono	4fe4s(2) AND adocbl(1)
QueGII_mono_mod_2:4fe4s_mod_1:adocbl	QueGII_mono	4fe4s(2) AND adocbl(1)
CLJU_c01520_mono_mod_1:mg2	CLJU_c01520_mono	mg2(1)
CLJU_c11280_mono_mod_1:mg2	CLJU_c11280_mono	mg2(1)
DnaJ_dim_mod_4:zn2	DnaJ_dim	zn2(4)
DnaJII_dim_mod_4:zn2	DnaJII_dim	zn2(4)
RnmV_mono_mod_1:mg2	RnmV_mono	mg2(1)
DusI_mono_mod_1:fad	DusI_mono	fad(1)
DusII_mono_mod_1:fad	DusII_mono	fad(1)
RlmN_mono_mod_1:4fe4s	RlmN_mono	4fe4s(1)
Def_mono_mod_1:fe2	Def_mono	fe2(1)
DefII_mono_mod_1:fe2	DefII_mono	fe2(1)
DefIII_mono_mod_1:fe2	DefIII_mono	fe2(1)
DefIV_mono_mod_1:fe2	DefIV_mono	fe2(1)
DefV_mono_mod_1:fe2	DefV_mono	fe2(1)
Map_mono_mod_2:fe2	Map_mono	fe2(2)
MnmEG_cplx_mod_2:fad_mod_2:k	MnmEG_cplx	fad(2) AND k(2)
IscS_dim_mod_2:pydx5p	IscS_dim	pydx5p(2)
IscSII_dim_mod_2:pydx5p	IscSII_dim	pydx5p(2)
#IscS_dim_mod_2:pydx5p_mod_1:SH	IscS_dim	pydx5p(2) AND SH(1)
RNase_Z_mod_2:zn2	RNase_Z	zn2(2)
MoaA_mono_MoaC_mono_mod_2:4fe4s_mod_1:amet	MoaA_mono_MoaC_mono	4fe4s(2) AND amet(1)
MobA_mono_mod_1:mg2	MobA_mono	mg2(1)
MoeA_dim_mod_2:mg2	MoeA_dim	mg2(2)
MoeAII_dim_mod_2:mg2	MoeAII_dim	mg2(2)
MoeAIII_dim_mod_2:mg2	MoeAIII_dim	mg2(2)
MoeAIV_dim_mod_2:mg2	MoeAIV_dim	mg2(2)
NfrA_dim_mod_2:fmn	NfrA_dim	fmn(2)
Transcription_normal_rho_independent_I_mod_1:mg2	Transcription_normal_rho_independent_I	mg2(1)
Transcription_normal_rho_independent_II_mod_1:mg2	Transcription_normal_rho_independent_II	mg2(1)
Transcription_normal_rho_independent_III_mod_1:mg2	Transcription_normal_rho_independent_III	mg2(1)
Transcription_normal_rho_dependent_I_mod_1:mg2	Transcription_normal_rho_dependent_I	mg2(1)
Transcription_normal_rho_dependent_II_mod_1:mg2	Transcription_normal_rho_dependent_II	mg2(1)
Transcription_normal_rho_dependent_III_mod_1:mg2	Transcription_normal_rho_dependent_III	mg2(1)
Transcription_stable_rho_independent_I_mod_1:mg2	Transcription_stable_rho_independent_I	mg2(1)
Transcription_stable_rho_independent_II_mod_1:mg2	Transcription_stable_rho_independent_II	mg2(1)
Transcription_stable_rho_independent_III_mod_1:mg2	Transcription_stable_rho_independent_III	mg2(1)
Transcription_stable_rho_dependent_I_mod_1:mg2	Transcription_stable_rho_dependent_I	mg2(1)
Transcription_stable_rho_dependent_II_mod_1:mg2	Transcription_stable_rho_dependent_II	mg2(1)
Transcription_stable_rho_dependent_III_mod_1:mg2	Transcription_stable_rho_dependent_III	mg2(1)
YgeX_dim_mod_1:pydx5p	YgeX_dim	pydx5p(1)
CysK_mono_mod_1:pydx5p	CysK_mono	pydx5p(1)
PDX5PO_CPLX_mod_1:fmn	PDX5PO_CPLX	fmn(1)
Fdx_mod_1:2fe2s	Fdx	2fe2s(1)
FdxII_mod_1:2fe2s	FdxII	2fe2s(1)
FdxIII_mod_1:2fe2s	FdxIII	2fe2s(1)
FdxIV_mod_1:4fe4s	FdxIV	4fe4s(1)
Mop_mono_mod_1:2fe2s	Mop_mono	2fe2s(1)
MopII_mono_mod_1:2fe2s	MopII_mono	2fe2s(1)

## Sheet: Table 3
TU_start	TU_end	Genes	Strand	Rho_independent	Stable_RNA
1003661	1008049	CLJU_c09050 CLJU_c09060 CLJU_c09070 CLJU_c09080	1	f	f
1006984	1012444	CLJU_c09090 CLJU_c09100 CLJU_c09110	-1	f	f
100802	103861	CLJU_c01070 CLJU_c01080	1	t	f
100	1453	CLJU_c00010	1	f	f
1010563	1014983	CLJU_c09120 CLJU_c09130	1	t	f
1015103	1017356	CLJU_c09140 CLJU_c09150 CLJU_c09160	1	f	f
1017590	1019614	CLJU_c09170 CLJU_c09180	1	t	f
1019779	1021729	CLJU_c09190	1	f	f
1021807	1024672	CLJU_c09200	1	t	f
1025226	1026216	CLJU_c09210	1	f	f
1026404	1030576	CLJU_c09220 CLJU_c09230 CLJU_c09240 CLJU_c09250	1	t	f
1030824	1032264	CLJU_c09260	1	t	f
1032638	1033919	CLJU_c09270	1	f	f
1034007	1035009	CLJU_c09280	1	f	f
1035081	1037561	CLJU_c09290 CLJU_c09300	1	f	f
1037815	1039825	CLJU_c09310	1	f	f
1037815	1040740	CLJU_c09320	-1	f	f
1039936	1042062	CLJU_c09330	1	f	f
104149	107173	CLJU_c01090 CLJU_c01100 CLJU_c01110	1	t	f
1042670	1046183	CLJU_c09340	1	t	f
1046552	1046900	CLJU_c09350	1	f	f
1046552	1047602	CLJU_c09360	-1	t	f
1046957	1048679	CLJU_c09370	1	f	f
1048917	1050870	CLJU_c09380	1	f	f
1050994	1056944	CLJU_c09390 CLJU_c09400 CLJU_c09410 CLJU_c09420 CLJU_c09430 CLJU_c09440 CLJU_c09450	1	f	f
1057203	1059826	CLJU_c09460 CLJU_c09470 CLJU_c09480	1	t	f
1060071	1062720	CLJU_c09490 CLJU_c09500 CLJU_c09510	1	f	f
106213	107885	CLJU_c01120	-1	t	f
1062800	1065631	CLJU_c09520 CLJU_c09530 CLJU_c09540 CLJU_c09550 CLJU_c09560	1	f	f
1065709	1066096	CLJU_c09570	1	f	f
1066405	1068763	CLJU_c09580	1	f	f
1068819	1069164	CLJU_c09590	1	f	f
1069810	1072232	CLJU_c09600 CLJU_c09610 CLJU_c09620	1	f	f
1072512	1074225	CLJU_c09630	1	t	f
107288	109224	CLJU_c01130	1	f	f
1074383	1079018	CLJU_c09640 CLJU_c09650 CLJU_c09660	1	f	f
1079131	1080379	CLJU_c09670	1	f	f
1080462	1081548	CLJU_c09680	1	t	f
1082113	1082290	CLJU_c09690	1	f	f
1082645	1083002	CLJU_c09700	1	f	f
1083251	1084895	CLJU_c09710	1	f	f
1085015	1089186	CLJU_c09720 CLJU_c09730	1	f	f
1089370	1092900	CLJU_c09740 CLJU_c09750	1	f	f
1090719	1094168	CLJU_c09760	-1	t	f
1094278	1096610	CLJU_c09770 CLJU_c09780 CLJU_c09790 CLJU_c09800	-1	f	f
1096783	1097146	CLJU_c09810	-1	f	f
1097253	1098030	CLJU_c09820	-1	f	f
1098215	1098843	CLJU_c09830 CLJU_c09840	-1	f	f
1098462	1099363	CLJU_c09850	1	f	f
109919	115015	CLJU_c01140 CLJU_c01150 CLJU_c01160 CLJU_c01170	1	f	t
1099458	1100127	CLJU_c09860	1	f	f
1100242	1100413	CLJU_c09870	1	f	f
1100511	1100865	CLJU_c09880	1	f	f
1101157	1102541	CLJU_c09890 CLJU_c09900	1	f	f
1102640	1103313	CLJU_c09910 CLJU_c09920	1	f	f
1103492	1103732	CLJU_c09930	1	f	f
1103838	1104888	CLJU_c09940	1	f	f
1105120	1106713	CLJU_c09950	1	f	f
1106841	1107963	CLJU_c09960 CLJU_c09970 CLJU_c09980	1	f	f
1108070	1108376	CLJU_c09990	1	f	f
1108478	1109489	CLJU_c10000	1	f	f
1109713	1110607	CLJU_c10010	1	t	f
1110853	1112323	CLJU_c10020	1	f	f
1112488	1112944	CLJU_c10030 CLJU_c10040	1	t	f
1113143	1113875	CLJU_c10050	1	f	f
1114074	1116360	CLJU_c10060	1	f	f
1116568	1121362	CLJU_c10070	1	t	f
1121497	1122250	CLJU_c10080	1	t	f
1122401	1123706	CLJU_c10090	1	t	f
1122401	1124239	CLJU_c10100	-1	f	f
1123774	1125068	CLJU_c10110	1	t	f
1125140	1125503	CLJU_c10120	1	f	f
1125629	1126004	CLJU_c10130	1	f	f
1126121	1126553	CLJU_c10140	1	f	f
1126766	1127099	CLJU_c10150	1	f	f
1127376	1129386	CLJU_c10160	1	f	f
1129531	1129870	CLJU_c10170	1	t	f
1130066	1130915	CLJU_c10180	1	f	f
1131238	1137161	CLJU_c10190 CLJU_c10200 CLJU_c10210 CLJU_c10220 CLJU_c10230 CLJU_c10240 CLJU_c10250	1	f	f
1137217	1140397	CLJU_c10260 CLJU_c10270 CLJU_c10280 CLJU_c10290	1	f	f
1140486	1141458	CLJU_c10300	1	f	f
1141740	1141935	CLJU_c10310	1	f	f
1141993	1151967	CLJU_c10320 CLJU_c10330 CLJU_c10340 CLJU_c10350 CLJU_c10360 CLJU_c10370 CLJU_c10380 CLJU_c10390 CLJU_c10400 CLJU_c10410 CLJU_c10420	1	f	f
115120	115864	CLJU_c01180	1	t	f
115120	117008	CLJU_c01190	-1	t	f
1152044	1153741	CLJU_c10430 CLJU_c10440 CLJU_c10450	1	f	f
1154183	1154582	CLJU_c10460	1	f	f
1154183	1156279	CLJU_c10470	-1	t	f
1154647	1159150	CLJU_c10480	1	t	f
1156609	1159592	CLJU_c10490	-1	t	f
1159187	1162139	CLJU_c10500	1	f	f
1162825	1163434	CLJU_c10510	1	f	f
1162825	1164692	CLJU_c10520	-1	t	f
1163594	1165401	CLJU_c10530	1	f	f
1165481	1168712	CLJU_c10540 CLJU_c10550 CLJU_c10560	1	f	f
1168914	1170363	CLJU_c10570	1	f	f
1170715	1173098	CLJU_c10580 CLJU_c10590	1	f	f
117243	119434	CLJU_c01200 CLJU_c01210	-1	t	f
1173184	1174303	CLJU_c10600	1	f	f
1174710	1177304	CLJU_c10610 CLJU_c10620 CLJU_c10630 CLJU_c10640	1	f	f
1177364	1180383	CLJU_c10650 CLJU_c10660 CLJU_c10670 CLJU_c10680 CLJU_c10690	1	t	f
1180508	1182586	CLJU_c10700 CLJU_c10710 CLJU_c10720	1	f	f
1181677	1184519	CLJU_c10730 CLJU_c10740	-1	f	f
1184833	1186570	CLJU_c10750	-1	t	f
1184833	1188625	CLJU_c10760 CLJU_c10770	1	t	f
1187545	1189504	CLJU_c10780	-1	f	f
1188904	1189872	CLJU_c10790	1	f	f
1189764	1190603	CLJU_c10800	-1	f	f
1190938	1191079	CLJU_c10810	-1	f	f
1190938	1191784	CLJU_c10820	1	f	f
1191265	1192758	CLJU_c10830	-1	f	f
1192107	1193633	CLJU_c10840	1	t	f
1193961	1194372	CLJU_c10850	1	f	f
1193961	1194857	CLJU_c10860	-1	f	f
1194410	1197066	CLJU_c10870	1	f	f
119492	121097	CLJU_c01220	-1	f	f
119492	122560	CLJU_c01230	1	t	f
1195743	1197646	CLJU_c10880 CLJU_c10890	-1	f	f
1197406	1199399	CLJU_c10900	1	t	f
1199706	1201149	CLJU_c10910 CLJU_c10920	1	f	f
1201212	1203760	CLJU_c10930 CLJU_c10940 CLJU_c10950 CLJU_c10960 CLJU_c10970	1	f	f
1203827	1204271	CLJU_c10980	1	f	f
1204381	1204801	CLJU_c10990	1	f	f
1205108	1206185	CLJU_c11000	1	f	f
1206504	1207512	CLJU_c11010 CLJU_c11020	1	t	f
1207630	1209077	CLJU_c11030 CLJU_c11040	1	f	f
1209134	1212232	CLJU_c11050 CLJU_c11060 CLJU_c11070 CLJU_c11080 CLJU_c11090	1	f	f
1212289	1212850	CLJU_c11100	1	f	f
1212960	1213359	CLJU_c11110	1	t	f
1213500	1222144	CLJU_c11120 CLJU_c11130 CLJU_c11140 CLJU_c11150 CLJU_c11160 CLJU_c11170 CLJU_c11180 CLJU_c11190 CLJU_c11200	1	f	f
1222316	1223423	CLJU_c11210	1	f	f
1223640	1224456	CLJU_c11220	1	f	f
1224524	1224695	CLJU_c11230	1	f	f
1224804	1225326	CLJU_c11240	1	f	f
1225394	1226045	CLJU_c11250	1	f	f
1226303	1228528	CLJU_c11260 CLJU_c11270	1	f	f
1228686	1231174	CLJU_c11280 CLJU_c11290 CLJU_c11300	1	f	f
122941	125887	CLJU_c01240 CLJU_c01250	1	f	f
1230598	1231669	CLJU_c11310	-1	f	f
1231736	1232237	CLJU_c11320	-1	f	f
1231736	1233632	CLJU_c11330	1	f	f
1232528	1234705	CLJU_c11340	-1	f	f
1234213	1235689	CLJU_c11350	1	t	f
1235902	1240949	CLJU_c11360 CLJU_c11370 CLJU_c11380 CLJU_c11390 CLJU_c11400 CLJU_c11410	1	t	f
1240094	1242134	CLJU_c11420 CLJU_c11430	-1	t	f
1242339	1242996	CLJU_c11440	-1	t	f
1243073	1243553	CLJU_c11450	-1	f	f
1243073	1244695	CLJU_c11460	1	f	f
1244752	1245013	CLJU_c11470	1	f	f
1244752	1246269	CLJU_c11480 CLJU_c11490	-1	f	f
1245498	1247851	CLJU_c11500	1	t	f
1246606	1248840	CLJU_c11510	-1	f	f
1248896	1249298	CLJU_c11520	-1	f	f
1248896	1249686	CLJU_c11530	1	f	f
1249858	1253629	CLJU_c11540	1	f	f
1249858	1254590	CLJU_c11550	-1	f	f
1253732	1255998	CLJU_c11560	1	f	f
1256056	1258663	CLJU_c11570 CLJU_c11580	1	f	f
1258722	1259619	CLJU_c11590	1	f	f
1260098	1261424	CLJU_c11600	1	f	f
1261586	1264751	CLJU_c11610 CLJU_c11620 CLJU_c11630	1	t	f
126344	127331	CLJU_c01260	1	t	f
1264909	1267072	CLJU_c11640	1	f	f
1267267	1268140	CLJU_c11650	1	f	f
1268322	1272107	CLJU_c11660 CLJU_c11670 CLJU_c11680 CLJU_c11690	1	f	f
1272230	1276153	CLJU_c11700 CLJU_c11710 CLJU_c11720 CLJU_c11730 CLJU_c11740 CLJU_c11750	1	f	f
127422	129893	CLJU_c01270 CLJU_c01280	1	t	f
1276552	1279345	CLJU_c11760 CLJU_c11770 CLJU_c11780	1	f	f
1279428	1280022	CLJU_c11790	1	f	f
1280149	1282359	CLJU_c11800 CLJU_c11810 CLJU_c11820	1	t	f
1282713	1285278	CLJU_c11830	1	f	f
1285396	1286329	CLJU_c11840	1	f	f
1285396	1287153	CLJU_c11850	-1	f	f
1287221	1288433	CLJU_c11860	-1	f	f
1287221	1298223	CLJU_c11870 CLJU_c11880 CLJU_c11890 CLJU_c11900 CLJU_c11910 CLJU_c11920 CLJU_c11930 CLJU_c11940 CLJU_c11950 CLJU_c11960 CLJU_c11970 CLJU_c11980	1	f	f
1298297	1298594	CLJU_c11990	1	f	f
1298297	1300010	CLJU_c12000	-1	f	f
1298693	1301672	CLJU_c12010	1	f	f
1302055	1302601	CLJU_c12020	1	f	f
1302055	1302795	CLJU_c12030	-1	f	f
1302597	1304502	CLJU_c12040	1	f	f
1304623	1309253	CLJU_c12050 CLJU_c12060 CLJU_c12070 CLJU_c12080 CLJU_c12090	1	f	f
130484	135623	CLJU_c01290 CLJU_c01300 CLJU_c01310	1	f	t
1309468	1311552	CLJU_c12100 CLJU_c12110 CLJU_c12120	1	f	f
1311702	1312209	CLJU_c12130	1	f	f
1312291	1313320	CLJU_c12140	1	t	f
1313691	1316331	CLJU_c12150	1	f	f
1316392	1316644	CLJU_c12160	1	f	f
1316707	1317121	CLJU_c12170	1	f	f
1317299	1317560	CLJU_c12180	1	t	f
1317794	1320354	CLJU_c12190 CLJU_c12200 CLJU_c12210	1	f	f
1320528	1322352	CLJU_c12220	1	f	f
1322409	1324285	CLJU_c12230 CLJU_c12240	1	t	f
1324370	1326035	CLJU_c12250	1	f	f
1326117	1326819	CLJU_c12260	1	f	f
1327092	1328148	CLJU_c12270	1	f	f
1328283	1329558	CLJU_c12280	1	t	f
1329860	1332344	CLJU_c12290 CLJU_c12300	1	t	f
1332556	1333354	CLJU_c12310	1	f	f
1333531	1334257	CLJU_c12320	1	f	f
1334330	1335104	CLJU_c12330	1	f	f
1335380	1335647	CLJU_c12340	1	f	f
1335714	1336170	CLJU_c12350	1	t	f
1336323	1339482	CLJU_c12360 CLJU_c12370 CLJU_c12380	1	f	f
1339651	1340554	CLJU_c12390	1	f	f
1340618	1343874	CLJU_c12400 CLJU_c12410 CLJU_c12420 CLJU_c12430	1	f	f
1344159	1345771	CLJU_c12440 CLJU_c12450	1	f	f
1345947	1349603	CLJU_c12460 CLJU_c12470 CLJU_c12480	1	f	f
1349680	1351159	CLJU_c12490	1	f	f
1351513	1354701	CLJU_c12500 CLJU_c12510 CLJU_c12520 CLJU_c12530 CLJU_c12540	1	f	f
1354793	1356995	CLJU_c12550	1	f	f
1357100	1359192	CLJU_c12560 CLJU_c12570 CLJU_c12580	1	f	f
135893	136619	CLJU_c01320	-1	t	f
1359280	1366498	CLJU_c12590 CLJU_c12600 CLJU_c12610 CLJU_c12620 CLJU_c12630 CLJU_c12640 CLJU_c12650	1	f	f
1366620	1366794	CLJU_c12660	1	f	f
1366620	1367121	CLJU_c12670	-1	f	f
1366929	1369356	CLJU_c12680 CLJU_c12690	1	f	f
136795	136869	CLJU_c01330	1	f	t
1369413	1371453	CLJU_c12700	1	f	f
1371839	1373446	CLJU_c12710 CLJU_c12720 CLJU_c12730	1	f	f
1372921	1374595	CLJU_c12740	-1	f	f
137372	137810	CLJU_c01340	1	f	f
137372	139809	CLJU_c01350 CLJU_c01360	-1	f	f
1374675	1375905	CLJU_c12750	-1	f	f
1374675	1378558	CLJU_c12760 CLJU_c12770 CLJU_c12780	1	f	f
1378621	1379324	CLJU_c12790 CLJU_c12800	1	t	f
1379436	1380450	CLJU_c12810	1	f	f
1380568	1380802	CLJU_c12820	1	t	f
1381076	1382870	CLJU_c12830 CLJU_c12840	1	f	f
1383005	1387515	CLJU_c12850 CLJU_c12860	1	f	f
1387639	1389341	CLJU_c12870 CLJU_c12880	1	f	f
138867	142454	CLJU_c01370 CLJU_c01380 CLJU_c01390	1	f	f
1389400	1389904	CLJU_c12890 CLJU_c12900	1	f	f
1390028	1391236	CLJU_c12910 CLJU_c12920	1	f	f
1391368	1394054	CLJU_c12930 CLJU_c12940 CLJU_c12950 CLJU_c12960	1	f	f
1393196	1394429	CLJU_c12970	-1	f	f
1394768	1396286	CLJU_c12980	-1	f	f
1394768	1397557	CLJU_c12990	1	f	f
1397669	1399778	CLJU_c13000	1	f	f
1400094	1400871	CLJU_c13010	1	f	f
1401215	1401923	CLJU_c13020	1	f	f
1402173	1403094	CLJU_c13030	1	t	f
1403190	1404482	CLJU_c13040 CLJU_c13050	1	f	f
1404642	1405410	CLJU_c13060	1	f	f
1405483	1406281	CLJU_c13070	1	t	f
1406680	1409959	CLJU_c13080 CLJU_c13090 CLJU_c13100	1	f	f
1410223	1417636	CLJU_c13110 CLJU_c13120 CLJU_c13130 CLJU_c13140 CLJU_c13150 CLJU_c13160 CLJU_c13170 CLJU_c13180 CLJU_c13190	1	f	f
1417751	1418015	CLJU_c13200	1	f	f
1418077	1420231	CLJU_c13210	1	f	f
1420338	1421637	CLJU_c13220	1	f	f
1421723	1421996	CLJU_c13230	1	f	f
1422102	1422768	CLJU_c13240	1	f	f
1422951	1425210	CLJU_c13250	1	f	f
1425269	1427181	CLJU_c13260 CLJU_c13270	1	f	f
142584	144999	CLJU_c01400 CLJU_c01410 CLJU_c01420 CLJU_c01430	1	f	f
1427326	1428415	CLJU_c13280	1	t	f
1428650	1430195	CLJU_c13290	1	t	f
1430345	1430594	CLJU_c13300	1	f	f
1430751	1433285	CLJU_c13310 CLJU_c13320 CLJU_c13330	1	f	f
1433356	1434550	CLJU_c13340	1	f	f
1434674	1434935	CLJU_c13350	1	f	f
1434674	1435193	CLJU_c13360	-1	t	f
1434977	1436871	CLJU_c13370	1	f	f
1437006	1437939	CLJU_c13380	1	f	f
1437006	1439393	CLJU_c13390	-1	t	f
1437950	1440809	CLJU_c13400	1	t	f
1439753	1442166	CLJU_c13410	-1	t	f
1440924	1442970	CLJU_c13420	1	f	f
1442361	1444572	CLJU_c13430	-1	t	f
1444738	1445341	CLJU_c13440	-1	f	f
1444738	1446175	CLJU_c13450	1	t	f
1445797	1448300	CLJU_c13460	-1	t	f
1446299	1450436	CLJU_c13470 CLJU_c13480	1	f	f
1450726	1451872	CLJU_c13490	1	t	f
1451926	1452358	CLJU_c13500 CLJU_c13510	1	f	f
1452082	1456170	CLJU_c13520 CLJU_c13530	-1	f	f
145244	145418	CLJU_c01440	1	f	f
1454778	1457290	CLJU_c13540	1	f	f
145564	147207	CLJU_c01450 CLJU_c01460	1	f	f
1457410	1457638	CLJU_c13550	1	f	f
1457810	1458962	CLJU_c13560	1	t	f
1459114	1461135	CLJU_c13570 CLJU_c13580	1	f	f
14598	15102	CLJU_c00120	1	f	f
1461228	1461354	CLJU_c13590	1	f	f
1461552	1462344	CLJU_c13600	1	f	f
1462421	1463066	CLJU_c13610	1	f	f
1463225	1465099	CLJU_c13620 CLJU_c13630	1	f	f
1465324	1465777	CLJU_c13640	1	f	f
1465324	1466131	CLJU_c13650	-1	f	f
1465957	1468783	CLJU_c13660 CLJU_c13670	1	t	f
1467796	1469397	CLJU_c13680	-1	t	f
1468824	1470543	CLJU_c13690 CLJU_c13700	1	f	f
1470665	1471763	CLJU_c13710	1	t	f
1471940	1472198	CLJU_c13720	1	f	f
1472348	1472693	CLJU_c13730	1	f	f
1472780	1474290	CLJU_c13740 CLJU_c13750	1	t	f
147381	148980	CLJU_c01470 CLJU_c01480	1	f	f
1474834	1476868	CLJU_c13760	1	t	f
1474834	1479097	CLJU_c13770 CLJU_c13780	-1	f	f
1478380	1481672	CLJU_c13790 CLJU_c13800 CLJU_c13810	1	f	f
1480940	1482655	CLJU_c13820	-1	f	f
1481914	1484859	CLJU_c13830	1	f	f
1484923	1485658	CLJU_c13840	1	t	f
1484923	1486096	CLJU_c13850	-1	t	f
1485700	1487765	CLJU_c13860	1	t	f
1486373	1489275	CLJU_c13870	-1	t	f
1487865	1492806	CLJU_c13880 CLJU_c13890 CLJU_c13900	1	f	f
1491420	1493681	CLJU_c13910	-1	f	f
149244	150282	CLJU_c01490	1	f	f
1493858	1495017	CLJU_c13920 CLJU_c13930	-1	t	f
1494450	1497555	CLJU_c13940 CLJU_c13950	1	t	f
1497756	1500318	CLJU_c13960 CLJU_c13970 CLJU_c13980	1	f	f
1500381	1500660	CLJU_c13990	1	f	f
1500723	1501152	CLJU_c14000	1	f	f
1501446	1501788	CLJU_c14010	1	t	f
1501446	1502132	CLJU_c14020	-1	t	f
1502276	1502712	CLJU_c14030 CLJU_c14040	-1	f	f
1502424	1503632	CLJU_c14050 CLJU_c14060	1	f	f
1503699	1505498	CLJU_c14070 CLJU_c14080	1	f	f
1505021	1507503	CLJU_c14090 CLJU_c14100	-1	f	f
1506891	1509593	CLJU_c14110	1	f	f
150728	151775	CLJU_c01500	1	f	f
150728	152213	CLJU_c01510	-1	t	f
1507808	1510991	CLJU_c14120	-1	f	f
1509830	1511834	CLJU_c14130	1	t	f
1511998	1513234	CLJU_c14140	1	f	f
1513366	1513966	CLJU_c14150	1	f	f
1514030	1514831	CLJU_c14160	1	f	f
1514963	1516650	CLJU_c14170 CLJU_c14180	1	t	f
1516808	1518573	CLJU_c14190 CLJU_c14200	1	f	f
1518228	1519030	CLJU_c14210	-1	f	f
1518598	1519679	CLJU_c14220	1	f	f
151967	154156	CLJU_c01520	1	t	f
1519764	1520730	CLJU_c14230	1	t	f
1520868	1523572	CLJU_c14240 CLJU_c14250	1	f	f
1521628	1524835	CLJU_c14260	-1	f	f
15221	18500	CLJU_c00130 CLJU_c00140	1	f	f
1524946	1526155	CLJU_c14270	-1	f	f
1524946	1527907	CLJU_c14280	1	f	f
1526692	1530961	CLJU_c14290 CLJU_c14300	-1	f	f
152755	156199	CLJU_c01530 CLJU_c01540 CLJU_c01550	-1	t	f
1531031	1533266	CLJU_c14310	-1	f	f
1533826	1534225	CLJU_c14320	-1	f	f
1533826	1537949	CLJU_c14330 CLJU_c14340	1	f	f
1535279	1539562	CLJU_c14350 CLJU_c14360	-1	t	f
1539655	1541474	CLJU_c14370 CLJU_c14380	-1	t	f
1540775	1543669	CLJU_c14390 CLJU_c14400	1	f	f
1543843	1547748	CLJU_c14410 CLJU_c14420 CLJU_c14430	1	f	f
1548001	1548373	CLJU_c14440	1	f	f
1548513	1549584	CLJU_c14450	1	f	f
1550453	1551710	CLJU_c14460	1	f	f
1551960	1553170	CLJU_c14470 CLJU_c14480	1	f	f
1553336	1562401	CLJU_c14490 CLJU_c14500 CLJU_c14510	1	f	f
155683	157192	CLJU_c01560	1	t	f
1562735	1565841	CLJU_c14520 CLJU_c14530	1	f	f
1563756	1572300	CLJU_c14540 CLJU_c14550 CLJU_c14560 CLJU_c14570 CLJU_c14580	-1	t	f
156598	157804	CLJU_c01570	-1	f	f
1571214	1573288	CLJU_c14590	1	f	f
1573437	1573620	CLJU_c14600	1	f	f
1574152	1574305	CLJU_c14610	1	f	f
1574677	1574887	CLJU_c14620	1	f	f
1574677	1575471	CLJU_c14630	-1	f	f
1574985	1577015	CLJU_c14640	1	f	f
1577228	1579202	CLJU_c14650	1	f	f
157873	158050	CLJU_c01580	-1	f	f
157873	158631	CLJU_c01590	1	f	f
1579365	1582632	CLJU_c14660	1	f	f
1579365	1584217	CLJU_c14670	-1	f	f
1582903	1585778	CLJU_c14680 CLJU_c14690	1	f	f
1585655	1589942	CLJU_c14700 CLJU_c14710 CLJU_c14720	-1	f	f
158832	159786	CLJU_c01600	1	f	f
1589459	1591676	CLJU_c14730 CLJU_c14740	1	f	f
1591782	1594350	CLJU_c14750	1	f	f
1594542	1595021	CLJU_c14760 CLJU_c14770	1	f	f
1594769	1597044	CLJU_c14780	-1	f	f
1597182	1597782	CLJU_c14790	-1	t	f
1597182	1601364	CLJU_c14800 CLJU_c14810	1	t	f
159938	160856	CLJU_c01610	1	f	f
1601871	1603188	CLJU_c14820	1	f	f
1603448	1604189	CLJU_c14830	1	t	f
1604490	1606971	CLJU_c14840	1	f	f
1604490	1607377	CLJU_c14850	-1	f	f
1607450	1607900	CLJU_c14860	-1	t	f
1607450	1608899	CLJU_c14870	1	t	f
1609233	1610187	CLJU_c14880	1	f	f
1609233	1610597	CLJU_c14890	-1	f	f
1610228	1611577	CLJU_c14900	1	t	f
161120	161441	CLJU_c01620	1	f	f
1611918	1613448	CLJU_c14910	1	f	f
1613752	1619563	CLJU_c14920 CLJU_c14930 CLJU_c14940 CLJU_c14950	1	f	t
161550	162258	CLJU_c01630	1	f	f
1620091	1623096	CLJU_c14960 CLJU_c14970 CLJU_c14980	1	f	f
1621644	1626469	CLJU_c14990 CLJU_c15000	-1	t	f
162322	163048	CLJU_c01640	1	f	f
1625320	1628265	CLJU_c15010	1	f	f
1628324	1630022	CLJU_c15020 CLJU_c15030 CLJU_c15040	1	t	f
1630421	1632335	CLJU_c15050	1	f	f
1630421	1633468	CLJU_c15060	-1	f	f
163162	163651	CLJU_c01650	1	f	f
163162	165002	CLJU_c01660	-1	f	f
1633557	1635463	CLJU_c15070 CLJU_c15080	-1	f	f
1634731	1637303	CLJU_c15090	1	f	f
1636091	1638017	CLJU_c15100	-1	f	f
1637375	1638842	CLJU_c15110	1	f	f
163829	167027	CLJU_c01670	1	f	f
1638326	1640996	CLJU_c15120 CLJU_c15130	-1	t	f
1639679	1641959	CLJU_c15140	1	t	f
1642240	1644139	CLJU_c15150	1	f	f
1644282	1648423	CLJU_c15160 CLJU_c15170 CLJU_c15180	1	f	f
1648991	1649465	CLJU_c15190	1	f	f
1649653	1651745	CLJU_c15200 CLJU_c15210	1	t	f
1652001	1652724	CLJU_c15220	1	f	f
1652001	1654102	CLJU_c15230	-1	f	f
1654284	1656351	CLJU_c15240	-1	f	f
165530	167523	CLJU_c01680 CLJU_c01690	-1	f	f
1656763	1658437	CLJU_c15250	-1	f	f
1658677	1659211	CLJU_c15260	-1	f	f
1658677	1663505	CLJU_c15270 CLJU_c15280 CLJU_c15290 CLJU_c15300	1	f	f
1663571	1664567	CLJU_c15310	1	f	f
1664763	1666233	CLJU_c15320	1	f	f
1666343	1670592	CLJU_c15330 CLJU_c15340 CLJU_c15350	1	f	f
1671040	1671806	CLJU_c15360 CLJU_c15370	1	f	f
1671284	1676276	CLJU_c15380 CLJU_c15390 CLJU_c15400 CLJU_c15410 CLJU_c15420	-1	f	f
167280	168823	CLJU_c01700 CLJU_c01710	1	f	f
1676726	1677002	CLJU_c15430	-1	t	f
1676726	1678020	CLJU_c15440 CLJU_c15450	1	f	f
1678079	1679985	CLJU_c15460 CLJU_c15470	1	f	f
1680060	1682892	CLJU_c15480 CLJU_c15490 CLJU_c15500	1	t	f
1682979	1683744	CLJU_c15510	1	f	f
1684158	1685898	CLJU_c15520	1	f	f
1684158	1686935	CLJU_c15530	-1	f	f
1685987	1689072	CLJU_c15540	1	f	f
168916	169495	CLJU_c01720	1	t	f
1689400	1690075	CLJU_c15550	1	f	f
1690257	1692302	CLJU_c15560 CLJU_c15570	1	t	f
1692619	1693156	CLJU_c15580	1	f	f
1693627	1697277	CLJU_c15590 CLJU_c15600 CLJU_c15610	1	f	f
1697499	1698156	CLJU_c15620	1	f	f
1697499	1698975	CLJU_c15630	-1	f	f
169844	171779	CLJU_c01730	1	f	f
1698516	1701844	CLJU_c15640 CLJU_c15650 CLJU_c15660	1	f	f
1701927	1702983	CLJU_c15670	1	t	f
1703251	1704232	CLJU_c15680	1	f	f
1704564	1706136	CLJU_c15690	1	f	f
1706328	1707836	CLJU_c15700 CLJU_c15710	1	t	f
1708117	1708798	CLJU_c15720	1	t	f
1709451	1710864	CLJU_c15730	1	t	f
1709	3047	CLJU_c00020 CLJU_c00030	1	f	f
1711282	1714359	CLJU_c15740 CLJU_c15750	1	f	f
1713513	1716738	CLJU_c15760 CLJU_c15770	-1	f	f
1715976	1718464	CLJU_c15780	1	t	f
1718858	1719437	CLJU_c15790	1	f	f
1719493	1721591	CLJU_c15800 CLJU_c15810	1	f	f
172061	172838	CLJU_c01740	1	f	f
1721786	1722362	CLJU_c15820	1	f	f
1721786	1723634	CLJU_c15830	-1	f	f
1722428	1727559	CLJU_c15840 CLJU_c15850 CLJU_c15860	1	f	f
1726158	1728624	CLJU_c15870 CLJU_c15880	-1	f	f
1729011	1729989	CLJU_c15890 CLJU_c15900	-1	f	f
1730181	1732146	CLJU_c15910	-1	f	f
1730181	1733209	CLJU_c15920	1	t	f
173163	174204	CLJU_c01750	1	f	f
1733498	1734278	CLJU_c15930	1	f	f
1734445	1735060	CLJU_c15940	1	t	f
1735316	1736640	CLJU_c15950 CLJU_c15960	1	t	f
1736016	1736960	CLJU_c15970	-1	f	f
1736699	1737822	CLJU_c15980	1	f	f
1738336	1741143	CLJU_c15990 CLJU_c16000 CLJU_c16010	1	f	f
1741467	1742841	CLJU_c16020	1	f	f
1743013	1744006	CLJU_c16030	1	t	f
174312	175711	CLJU_c01760 CLJU_c01770	1	f	f
1744356	1746296	CLJU_c16040 CLJU_c16050 CLJU_c16060	1	t	f
1746633	1753124	CLJU_c16070 CLJU_c16080 CLJU_c16090 CLJU_c16100 CLJU_c16110 CLJU_c16120 CLJU_c16130	1	f	f
1753241	1755332	CLJU_c16140	1	t	f
1753241	1758533	CLJU_c16150 CLJU_c16160	-1	f	f
1756589	1759701	CLJU_c16170	1	f	f
175809	177714	CLJU_c01780 CLJU_c01790	1	f	f
1758774	1762723	CLJU_c16180	-1	f	f
1759876	1764941	CLJU_c16190 CLJU_c16200	1	f	f
1765156	1767004	CLJU_c16210 CLJU_c16220 CLJU_c16230	1	f	f
1767225	1768518	CLJU_c16240	1	f	f
1768688	1770548	CLJU_c16250 CLJU_c16260	1	f	f
1769156	1771085	CLJU_c16270	-1	f	f
1771438	1771909	CLJU_c16280	-1	f	f
1771970	1773006	CLJU_c16290 CLJU_c16300	-1	f	f
1773208	1773391	CLJU_c16310	-1	f	f
1773208	1773888	CLJU_c16320	1	f	f
1774157	1774403	CLJU_c16330	1	f	f
1774472	1775816	CLJU_c16340	1	f	f
1774472	1778774	CLJU_c16350 CLJU_c16360 CLJU_c16370	-1	t	f
1778886	1779996	CLJU_c16380 CLJU_c16390	-1	f	f
177903	178752	CLJU_c01800	1	f	f
1779267	1780553	CLJU_c16400	1	t	f
1780672	1781749	CLJU_c16410	1	f	f
1781831	1784125	CLJU_c16420 CLJU_c16430	1	t	f
1783351	1789827	CLJU_c16440 CLJU_c16450 CLJU_c16460 CLJU_c16470 CLJU_c16480 CLJU_c16490	-1	f	f
178815	179664	CLJU_c01810	1	f	f
1790044	1790605	CLJU_c16500	-1	f	f
1790044	1793881	CLJU_c16510	1	t	f
1794032	1796666	CLJU_c16520	1	t	f
1796823	1799037	CLJU_c16530	1	f	f
179770	179959	CLJU_c01820	1	f	f
179770	180246	CLJU_c01830	-1	t	f
1799154	1800548	CLJU_c16540 CLJU_c16550	1	t	f
1800113	1801594	CLJU_c16560	-1	f	f
180060	183558	CLJU_c01840 CLJU_c01850 CLJU_c01860	1	f	f
1800940	1802529	CLJU_c16570	1	f	f
1801776	1802767	CLJU_c16580	-1	t	f
1802530	1803790	CLJU_c16590 CLJU_c16600	1	f	f
1804224	1804899	CLJU_c16610	1	f	f
1805102	1805759	CLJU_c16620 CLJU_c16630	1	f	f
1805862	1807643	CLJU_c16640 CLJU_c16650	1	f	f
1807724	1811075	CLJU_c16660	1	f	f
1811550	1812892	CLJU_c16670 CLJU_c16680 CLJU_c16690 CLJU_c16700	1	f	f
1812975	1813542	CLJU_c16710	1	f	f
1813619	1814450	CLJU_c16720	1	f	f
1814629	1815150	CLJU_c16730 CLJU_c16740	1	f	f
1815492	1816305	CLJU_c16750	1	f	f
1816377	1817618	CLJU_c16760 CLJU_c16770	1	f	f
1818096	1819624	CLJU_c16780 CLJU_c16790	1	f	f
1819758	1821147	CLJU_c16800	1	t	f
1821229	1829566	CLJU_c16810	1	f	f
1829637	1832965	CLJU_c16820 CLJU_c16830 CLJU_c16840	1	f	f
183192	184666	CLJU_c01870	-1	f	f
1833908	1834535	CLJU_c16850	1	f	f
1834610	1835216	CLJU_c16860	1	f	f
1835302	1836332	CLJU_c16870 CLJU_c16880	1	t	f
1836394	1838163	CLJU_c16890 CLJU_c16900	1	f	f
1838281	1839569	CLJU_c16910 CLJU_c16920	1	t	f
184033	186631	CLJU_c01880	1	t	f
1840624	1840975	CLJU_c16940	1	t	f
1841204	1842437	CLJU_c16950 CLJU_c16960 CLJU_c16970	1	f	f
1841771	1843007	CLJU_c16980	-1	f	f
1842515	1843825	CLJU_c16990	1	t	f
1844797	1846177	CLJU_c17000	1	f	f
1846582	1847116	CLJU_c17010	1	f	f
1846582	1848295	CLJU_c17020	-1	f	f
1847185	1849598	CLJU_c17030 CLJU_c17040	1	f	f
1849442	1850383	CLJU_c17050	-1	f	f
1849690	1850985	CLJU_c17060	1	f	f
1850637	1852073	CLJU_c17070	-1	f	f
1852588	1853554	CLJU_c17080	-1	f	f
1852588	1854404	CLJU_c17090	1	f	f
1853939	1855629	CLJU_c17100	-1	f	f
1854543	1861954	CLJU_c17110 CLJU_c17120 CLJU_c17130 CLJU_c17140 CLJU_c17150 CLJU_c17160	1	f	f
18575	20333	CLJU_c00150 CLJU_c00160	1	f	f
1862335	1864717	CLJU_c17170 CLJU_c17180 CLJU_c17190	1	f	f
1864960	1869420	CLJU_c17200 CLJU_c17210 CLJU_c17220 CLJU_c17230 CLJU_c17240	1	f	f
1869500	1870592	CLJU_c17250	1	f	f
1869500	1871276	CLJU_c17260	-1	f	f
187049	190157	CLJU_c01890	1	t	f
1870673	1873720	CLJU_c17270 CLJU_c17280	1	f	f
1874072	1874633	CLJU_c17290	1	f	f
1874778	1875240	CLJU_c17300	1	f	f
1875362	1877208	CLJU_c17310 CLJU_c17320	1	f	f
1877299	1880607	CLJU_c17330 CLJU_c17340	1	f	f
1880926	1883536	CLJU_c17350 CLJU_c17360	1	f	f
1883769	1889753	CLJU_c17370 CLJU_c17380	1	t	f
1890261	1891653	CLJU_c17390	1	t	f
1891741	1892221	CLJU_c17400	1	f	f
1892383	1892998	CLJU_c17410	1	t	f
1893551	1894621	CLJU_c17420 CLJU_c17430	1	f	f
1894750	1895206	CLJU_c17440	1	f	f
1895321	1896815	CLJU_c17450	1	f	f
1895321	1897757	CLJU_c17460	-1	f	f
1896851	1898778	CLJU_c17470	1	t	f
1899108	1900665	CLJU_c17480 CLJU_c17490	1	f	f
1899699	1901685	CLJU_c17500	-1	f	f
1900863	1903203	CLJU_c17510	1	f	f
1902030	1903870	CLJU_c17520	-1	f	f
190313	191312	CLJU_c01900	1	f	f
1903984	1904710	CLJU_c17530	-1	f	f
1904774	1905482	CLJU_c17540	-1	f	f
1905591	1905912	CLJU_c17550	-1	f	f
1906475	1907327	CLJU_c17560	-1	f	f
1906475	1908574	CLJU_c17570 CLJU_c17580	1	f	f
1908676	1909261	CLJU_c17590	1	f	f
1909386	1909836	CLJU_c17600	1	t	f
1909973	1910373	CLJU_c17610 CLJU_c17620	1	f	f
1910519	1912857	CLJU_c17630 CLJU_c17640 CLJU_c17650	1	f	f
1913074	1913521	CLJU_c17660	1	f	f
1913577	1914264	CLJU_c17670	1	f	f
191419	192028	CLJU_c01910	1	t	f
1914324	1914942	CLJU_c17680	1	f	f
1914324	1916317	CLJU_c17690	-1	f	f
1915387	1917344	CLJU_c17700	1	f	f
1917883	1919473	CLJU_c17710	1	t	f
1917883	1920610	CLJU_c17720	-1	t	f
1919746	1921393	CLJU_c17730	1	f	f
1920976	1922756	CLJU_c17740	-1	f	f
192248	196334	CLJU_c01920	1	t	f
1923065	1924238	CLJU_c17750	-1	f	f
1924429	1924786	CLJU_c17760	-1	f	f
1924429	1925859	CLJU_c17770	1	f	f
1925962	1926610	CLJU_c17780	1	t	f
1925962	1927107	CLJU_c17790	-1	t	f
1926828	1927676	CLJU_c17800	1	f	f
1927415	1928707	CLJU_c17810	-1	f	f
1928925	1929768	CLJU_c17820	-1	t	f
1928925	1931965	CLJU_c17830	1	f	f
1929967	1932571	CLJU_c17840	-1	f	f
1932088	1934091	CLJU_c17850	1	f	f
1932666	1935088	CLJU_c17860	-1	f	f
1934299	1935867	CLJU_c17870	1	f	f
1935939	1936641	CLJU_c17880	1	f	f
1935939	1937577	CLJU_c17890	-1	f	f
1936698	1939535	CLJU_c17900	1	f	f
1939705	1941637	CLJU_c17910	1	t	f
1939705	1942948	CLJU_c17920 CLJU_c17930	-1	t	f
1942570	1945684	CLJU_c17940 CLJU_c17950	1	f	f
1945931	1948235	CLJU_c17960	1	f	f
1945931	1949110	CLJU_c17970	-1	t	f
1948270	1950319	CLJU_c17980	1	f	f
1950452	1951058	CLJU_c17990	1	t	f
1950452	1951751	CLJU_c18000	-1	f	f
1951220	1952250	CLJU_c18010	1	f	f
1951887	1953610	CLJU_c18020	-1	f	f
1952458	1956101	CLJU_c18030	1	f	f
1956334	1957855	CLJU_c18040	1	f	f
1956334	1958858	CLJU_c18050	-1	f	f
1957976	1959965	CLJU_c18060	1	t	f
1960371	1961055	CLJU_c18070	1	f	f
1961201	1964204	CLJU_c18080 CLJU_c18090 CLJU_c18100	1	f	f
1964276	1965212	CLJU_c18110	1	f	f
196471	197539	CLJU_c01930	1	f	f
196471	198499	CLJU_c01940 CLJU_c01950	-1	f	f
1965306	1965705	CLJU_c18120	1	f	f
1965848	1966493	CLJU_c18130	1	f	f
1966858	1970565	CLJU_c18140 CLJU_c18150 CLJU_c18160	1	f	f
1970874	1971039	CLJU_c18170	1	f	f
1971218	1971995	CLJU_c18180	1	f	f
1971218	1972403	CLJU_c18190	-1	f	f
1972615	1973458	CLJU_c18200	-1	f	f
1973560	1973989	CLJU_c18210	-1	f	f
1973560	1975778	CLJU_c18220 CLJU_c18230	1	t	f
1975968	1977291	CLJU_c18240	1	f	f
1977347	1981335	CLJU_c18250 CLJU_c18270 CLJU_c18280	1	f	f
197884	199890	CLJU_c01960	1	f	f
1981524	1982703	CLJU_c18290	1	f	f
1982841	1983321	CLJU_c18300	1	t	f
1983744	1987909	CLJU_c18310 CLJU_c18320 CLJU_c18330 CLJU_c18340	1	f	f
1988131	1990904	CLJU_c18350 CLJU_c18360 CLJU_c18370	1	f	f
1991045	1991522	CLJU_c18380	1	f	f
1991719	1992942	CLJU_c18390 CLJU_c18400 CLJU_c18410	1	f	f
1993015	1996029	CLJU_c18420 CLJU_c18430	1	f	f
1995462	1999762	CLJU_c18440 CLJU_c18450 CLJU_c18460	-1	f	f
1999944	2001111	CLJU_c18470	-1	t	f
2001342	2001982	CLJU_c18480 CLJU_c18490	-1	t	f
2001766	2003412	CLJU_c18500	1	f	f
200221	201604	CLJU_c01970	1	t	f
2002263	2004619	CLJU_c18510	-1	f	f
2004751	2006374	CLJU_c18520	-1	f	f
2004751	2006716	CLJU_c18530	1	f	f
2006798	2008180	CLJU_c18540 CLJU_c18550 CLJU_c18560	1	f	f
2007457	2009556	CLJU_c18570 CLJU_c18580	-1	f	f
2008569	2010566	CLJU_c18590	1	f	f
2011029	2012484	CLJU_c18600	1	f	f
2012758	2014627	CLJU_c18610	1	f	f
2012758	2015484	CLJU_c18620	-1	f	f
2015671	2016073	CLJU_c18630	-1	f	f
2016241	2018269	CLJU_c18640	-1	f	f
2016241	2018689	CLJU_c18650	1	f	f
201743	203009	CLJU_c01980	1	t	f
201743	204276	CLJU_c01990	-1	t	f
2018769	2020245	CLJU_c18660	1	f	f
2020720	2022787	CLJU_c18670	1	f	f
2020720	2024976	CLJU_c18680	-1	f	f
2023356	2026503	CLJU_c18690	1	f	f
2026660	2027635	CLJU_c18700	1	f	f
2027703	2028980	CLJU_c18710 CLJU_c18720	1	f	f
2029080	2029722	CLJU_c18730	1	f	f
2029840	2031424	CLJU_c18740	1	f	f
2029840	2031953	CLJU_c18750	-1	f	f
2031449	2034630	CLJU_c18760	1	f	f
203157	207552	CLJU_c02000 CLJU_c02010 CLJU_c02020 CLJU_c02030	1	f	f
2032725	2035395	CLJU_c18770	-1	t	f
2035570	2036353	CLJU_c18780	-1	f	f
2035570	2037939	CLJU_c18790	1	f	f
2036478	2039082	CLJU_c18800	-1	f	f
2038263	2040109	CLJU_c18810	1	f	f
2040211	2041075	CLJU_c18820	1	f	f
2041403	2042009	CLJU_c18830	1	f	f
2041403	2042739	CLJU_c18840	-1	t	f
2042607	2044475	CLJU_c18850 CLJU_c18860	1	f	f
2044010	2045301	CLJU_c18870	-1	f	f
2044572	2047687	CLJU_c18880	1	f	f
2047936	2052499	CLJU_c18890 CLJU_c18900 CLJU_c18910	1	t	f
2052638	2054981	CLJU_c18920 CLJU_c18930	1	f	f
2055091	2056399	CLJU_c18940	1	f	f
2055091	2059118	CLJU_c18950	-1	f	f
2056715	2059932	CLJU_c18960	1	f	f
2059407	2061987	CLJU_c18970	-1	f	f
2060517	2064237	CLJU_c18980	1	f	f
2062290	2065447	CLJU_c18990	-1	f	f
2064373	2066278	CLJU_c19000 CLJU_c19010	1	f	f
206529	208783	CLJU_c02040	-1	t	f
2066541	2068161	CLJU_c19020	1	f	f
2068309	2069917	CLJU_c19030	1	f	f
2069995	2070655	CLJU_c19040	1	f	f
20706	21987	CLJU_c00170	1	t	f
2071072	2072860	CLJU_c19050	1	t	f
2071072	2073327	CLJU_c19060	-1	f	f
2073039	2075749	CLJU_c19070	1	f	f
2076280	2077234	CLJU_c19080	1	f	f
207658	209898	CLJU_c02050	1	f	f
2077353	2082866	CLJU_c19090 CLJU_c19100 CLJU_c19110 CLJU_c19120 CLJU_c19130	1	f	f
2081072	2083592	CLJU_c19140	-1	f	f
2082983	2084567	CLJU_c19150	1	f	f
2083721	2084895	CLJU_c19160	-1	f	f
2085279	2085426	CLJU_c19170	-1	f	f
2085524	2085695	CLJU_c19180	-1	f	f
2085524	2086520	CLJU_c19190	1	f	f
2086627	2087374	CLJU_c19200	1	f	f
2086627	2088376	CLJU_c19210	-1	f	f
2087668	2091330	CLJU_c19220 CLJU_c19230	1	f	f
2091489	2091879	CLJU_c19240	1	t	f
2092449	2092656	CLJU_c19250	1	t	f
2092449	2093621	CLJU_c19260 CLJU_c19270	-1	t	f
2093159	2098662	CLJU_c19280 CLJU_c19290 CLJU_c19300	1	t	f
2098867	2101629	CLJU_c19310 CLJU_c19320	1	f	f
2100123	2102365	CLJU_c19330	-1	f	f
210030	210900	CLJU_c02060	1	f	f
2101693	2103753	CLJU_c19340	1	f	f
2104002	2105248	CLJU_c19350 CLJU_c19360	1	t	f
2105364	2106312	CLJU_c19370	1	f	f
2105364	2106961	CLJU_c19380 CLJU_c19390	-1	f	f
2106568	2108713	CLJU_c19400 CLJU_c19410	1	f	f
2108779	2111421	CLJU_c19420 CLJU_c19430 CLJU_c19440	1	f	f
211105	211345	CLJU_c02070	1	t	f
2111707	2113847	CLJU_c19450 CLJU_c19460	1	f	f
2113930	2115295	CLJU_c19470	1	f	f
2113930	2116252	CLJU_c19480	-1	f	f
2116312	2116834	CLJU_c19490	-1	f	f
2116312	2117512	CLJU_c19500	1	f	f
2117314	2118413	CLJU_c19510	-1	f	f
211739	213293	CLJU_c02080	1	t	f
2117591	2120931	CLJU_c19520 CLJU_c19530 CLJU_c19540 CLJU_c19550 CLJU_c19560	1	f	f
2121177	2121663	CLJU_c19570	1	f	f
2121865	2122063	CLJU_c19580	1	t	f
2121865	2124842	CLJU_c19590 CLJU_c19600	-1	f	f
2124945	2125875	CLJU_c19610	-1	f	f
2124945	2126405	CLJU_c19620	1	f	f
2126075	2128558	CLJU_c19630 CLJU_c19640	-1	f	f
2127877	2130616	CLJU_c19650 CLJU_c19660	1	f	f
2130753	2132818	CLJU_c19670 CLJU_c19680	1	f	f
2131807	2133993	CLJU_c19690	-1	f	f
2132820	2134656	CLJU_c19700	1	f	f
2134131	2136271	CLJU_c19710 CLJU_c19720	-1	f	f
2136512	2137592	CLJU_c19730	-1	t	f
2136512	2139220	CLJU_c19740	1	f	f
213691	214498	CLJU_c02090	1	f	f
2139303	2142480	CLJU_c19750 CLJU_c19760	1	t	f
2142893	2144768	CLJU_c19770	1	t	f
2142893	2146526	CLJU_c19780	-1	f	f
2145281	2147615	CLJU_c19790	1	f	f
2147731	2148601	CLJU_c19800	1	f	f
214807	217432	CLJU_c02100	1	t	f
2148806	2152880	CLJU_c19810 CLJU_c19820 CLJU_c19830 CLJU_c19840 CLJU_c19850	1	t	f
2152412	2154561	CLJU_c19860	-1	f	f
2154942	2156211	CLJU_c19870	-1	t	f
2154942	2157196	CLJU_c19880	1	f	f
2157431	2158001	CLJU_c19890	1	f	f
2158094	2158880	CLJU_c19900	1	t	f
2159033	2159600	CLJU_c19910	1	f	f
2159033	2160527	CLJU_c19920	-1	f	f
2160080	2161692	CLJU_c19930	1	f	f
2161979	2162837	CLJU_c19940	1	f	f
2163061	2163949	CLJU_c19950	1	f	f
2164302	2164962	CLJU_c19960	1	f	f
2165187	2168089	CLJU_c19970 CLJU_c19980	1	t	f
2168347	2169214	CLJU_c19990	1	f	f
2168347	2170133	CLJU_c20000	-1	f	f
2170334	2170892	CLJU_c20010	-1	f	f
2170982	2171177	CLJU_c20020	-1	f	f
2171318	2174010	CLJU_c20030 CLJU_c20040	-1	t	f
2171904	2175565	CLJU_c20050 CLJU_c20060	1	f	f
217536	218379	CLJU_c02110	1	f	f
2175850	2176666	CLJU_c20070	1	f	f
2176723	2177761	CLJU_c20080	1	f	f
2177887	2178976	CLJU_c20090	1	t	f
2179098	2179362	CLJU_c20100	1	f	f
2179644	2181468	CLJU_c20110	1	f	f
2181650	2182991	CLJU_c20120	1	f	f
2183155	2185054	CLJU_c20130	1	f	f
2185575	2190997	CLJU_c20140 CLJU_c20150 CLJU_c20160 CLJU_c20170 CLJU_c20180	1	t	f
218770	220436	CLJU_c02120 CLJU_c02130	1	f	f
2191122	2192576	CLJU_c20190 CLJU_c20200	1	f	f
2192714	2194538	CLJU_c20210	1	f	f
2194630	2195544	CLJU_c20220 CLJU_c20230	1	f	f
2195719	2197660	CLJU_c20240	1	t	f
2198029	2198476	CLJU_c20250	1	f	f
2198549	2199413	CLJU_c20260	1	f	f
2199540	2200437	CLJU_c20270	1	f	f
2200596	2203242	CLJU_c20280	1	f	f
2203436	2204783	CLJU_c20290	1	f	f
2203436	2206118	CLJU_c20300	-1	t	f
2204813	2211141	CLJU_c20310 CLJU_c20320	1	t	f
220510	222769	CLJU_c02140	1	f	f
2211572	2214809	CLJU_c20330 CLJU_c20340 CLJU_c20350	1	f	f
2214921	2215839	CLJU_c20360	1	t	f
2216006	2217923	CLJU_c20370	1	t	f
2218189	2219128	CLJU_c20380	1	f	f
2220564	2221578	CLJU_c20390	1	f	f
2221956	2222970	CLJU_c20400	1	f	f
2223525	2228085	CLJU_c20410 CLJU_c20420 CLJU_c20430	1	f	f
22244	22695	CLJU_c00180 CLJU_c00190 CLJU_c00200	1	f	t
2228334	2228601	CLJU_c20440	1	f	f
2228334	2230643	CLJU_c20450	-1	t	f
222853	223498	CLJU_c02150	1	f	f
222853	224853	CLJU_c02160	-1	f	f
2228681	2232071	CLJU_c20460	1	t	f
2232838	2234197	CLJU_c20470	1	f	f
2234263	2237801	CLJU_c20480 CLJU_c20490 CLJU_c20500 CLJU_c20510 CLJU_c20520	1	t	f
223614	226720	CLJU_c02170	1	f	f
2237309	2239327	CLJU_c20530	-1	t	f
2237854	2240170	CLJU_c20540	1	f	f
2240670	2242038	CLJU_c20550	1	f	f
2242306	2244044	CLJU_c20560 CLJU_c20570	1	f	f
2244288	2245431	CLJU_c20580	1	t	f
2244288	2247410	CLJU_c20590	-1	t	f
2247895	2249550	CLJU_c20600 CLJU_c20610	-1	t	f
2248800	2254959	CLJU_c20620 CLJU_c20630 CLJU_c20640 CLJU_c20650 CLJU_c20660 CLJU_c20670 CLJU_c20680	1	f	f
2255055	2255853	CLJU_c20690	1	f	f
2256063	2257804	CLJU_c20700 CLJU_c20710	1	t	f
2256691	2261308	CLJU_c20720 CLJU_c20730	-1	t	f
2259754	2263024	CLJU_c20740 CLJU_c20750	1	f	f
2263161	2263674	CLJU_c20760	1	t	f
2263161	2265974	CLJU_c20770 CLJU_c20780	-1	t	f
2264669	2267596	CLJU_c20790	1	t	f
2266279	2269566	CLJU_c20800	-1	t	f
2267709	2270721	CLJU_c20810	1	f	f
226946	227363	CLJU_c02180	1	f	f
2270851	2271241	CLJU_c20820	1	f	f
2270851	2271726	CLJU_c20830	-1	f	f
2271330	2272782	CLJU_c20840	1	f	f
2272875	2274291	CLJU_c20850	1	f	f
2274370	2275964	CLJU_c20860 CLJU_c20870	1	f	f
227449	227755	CLJU_c02190	1	t	f
2276303	2278334	CLJU_c20880	1	f	f
2278515	2280090	CLJU_c20890 CLJU_c20900 CLJU_c20910	1	f	f
22790	23966	CLJU_c00210	-1	f	f
228015	229620	CLJU_c02200	1	f	f
2281105	2281686	CLJU_c20940 CLJU_c20950	1	t	f
2281925	2282714	CLJU_c20960	1	f	f
2282799	2283012	CLJU_c20970	1	f	f
2282799	2286023	CLJU_c20980 CLJU_c20990 CLJU_c21000	-1	t	f
2285087	2287853	CLJU_c21010	1	f	f
2286866	2288318	CLJU_c21020	-1	t	f
2287898	2290320	CLJU_c21030 CLJU_c21040	1	f	f
2289105	2290829	CLJU_c21050	-1	f	f
2291000	2294212	CLJU_c21060 CLJU_c21070 CLJU_c21080 CLJU_c21090	-1	f	f
2293849	2295810	CLJU_c21100	1	t	f
2296004	2297072	CLJU_c21110	1	f	f
2296004	2298518	CLJU_c21120	-1	f	f
2297180	2299877	CLJU_c21130	1	f	f
229830	230175	CLJU_c02210	1	f	f
2300539	2301880	CLJU_c21140	1	t	f
2300539	2302463	CLJU_c21150	-1	t	f
2302779	2303712	CLJU_c21160	-1	f	f
230356	231811	CLJU_c02220	1	t	f
230356	232088	CLJU_c02230	-1	t	f
2303791	2304028	CLJU_c21170	-1	f	f
2304268	2304727	CLJU_c21180	-1	t	f
2304956	2306978	CLJU_c21190	-1	f	f
2307198	2308476	CLJU_c21200	-1	t	f
2308554	2315685	CLJU_c21210 CLJU_c21220 CLJU_c21230 CLJU_c21240 CLJU_c21250	-1	t	f
2315838	2316276	CLJU_c21260	-1	t	f
2315838	2318120	CLJU_c21270 CLJU_c21280	1	f	f
2318180	2319377	CLJU_c21290	1	f	f
2318180	2320289	CLJU_c21300	-1	t	f
231875	234166	CLJU_c02240 CLJU_c02250	1	f	f
2320387	2320768	CLJU_c21310	-1	f	f
2320988	2323587	CLJU_c21320 CLJU_c21330	-1	f	f
2323716	2324943	CLJU_c21340	-1	f	f
2325029	2325905	CLJU_c21350	-1	f	f
2326077	2326767	CLJU_c21360	-1	f	f
2326929	2328330	CLJU_c21370	-1	t	f
2326929	2329158	CLJU_c21380	1	f	f
2328576	2330107	CLJU_c21390	-1	f	f
2329273	2331109	CLJU_c21400	1	f	f
2330353	2331786	CLJU_c21410	-1	f	f
2331183	2333048	CLJU_c21420	1	t	f
2332028	2335078	CLJU_c21430	-1	t	f
2335235	2335874	CLJU_c21440	-1	t	f
2336081	2337485	CLJU_c21450	-1	f	f
2337870	2339394	CLJU_c21460	-1	f	f
2339465	2340719	CLJU_c21470	-1	f	f
2340936	2342964	CLJU_c21480	-1	f	f
2340936	2346332	CLJU_c21490	1	f	f
234226	235300	CLJU_c02260	1	f	f
2343299	2347302	CLJU_c21500	-1	f	f
2347542	2350840	CLJU_c21510 CLJU_c21520 CLJU_c21530	-1	t	f
2350943	2351978	CLJU_c21540	-1	f	f
2352223	2355466	CLJU_c21550	-1	f	f
235364	235991	CLJU_c02270	1	f	f
2355736	2356291	CLJU_c21560	-1	f	f
2356526	2359175	CLJU_c21570 CLJU_c21580	-1	f	f
2359375	2363032	CLJU_c21590 CLJU_c21600 CLJU_c21610	-1	f	f
236059	236782	CLJU_c02280	1	f	f
2363327	2365502	CLJU_c21620 CLJU_c21630 CLJU_c21640	-1	t	f
2364776	2367896	CLJU_c21650 CLJU_c21660 CLJU_c21670	1	f	f
2367734	2368282	CLJU_c21680	-1	t	f
2368369	2369167	CLJU_c21690	-1	f	f
236894	238458	CLJU_c02290 CLJU_c02300	1	f	f
2369238	2370933	CLJU_c21700	-1	f	f
2370998	2371985	CLJU_c21710	-1	f	f
2372328	2377650	CLJU_c21720 CLJU_c21730 CLJU_c21740 CLJU_c21750 CLJU_c21760	-1	t	f
2377897	2379782	CLJU_c21770 CLJU_c21780	-1	t	f
2379296	2380258	CLJU_c21790	1	f	f
2379979	2381553	CLJU_c21800	-1	f	f
2382111	2383575	CLJU_c21810	-1	t	f
2383986	2386275	CLJU_c21820 CLJU_c21830	-1	t	f
238559	239009	CLJU_c02310	1	f	f
2386479	2386842	CLJU_c21840	-1	t	f
2386479	2387389	CLJU_c21850	1	t	f
2387062	2387640	CLJU_c21860	-1	t	f
2387439	2388744	CLJU_c21870	1	f	f
2387886	2390463	CLJU_c21880	-1	f	f
2390662	2391601	CLJU_c21890	-1	f	f
239135	239765	CLJU_c02320	1	t	f
2391855	2393508	CLJU_c21900 CLJU_c21910 CLJU_c21920	-1	f	f
2393325	2395150	CLJU_c21930	1	f	f
2394250	2396351	CLJU_c21940	-1	f	f
2396513	2398811	CLJU_c21950	-1	f	f
2396513	2399482	CLJU_c21960	1	f	f
239909	242570	CLJU_c02330 CLJU_c02340 CLJU_c02350	1	f	f
2400064	2400238	CLJU_c21970	1	f	f
2400064	2403403	CLJU_c21980 CLJU_c21990 CLJU_c22000 CLJU_c22010	-1	f	f
2403494	2405547	CLJU_c22020 CLJU_c22030	-1	f	f
2405667	2406231	CLJU_c22040	-1	f	f
2405667	2407730	CLJU_c22050	1	f	f
2406392	2409519	CLJU_c22060 CLJU_c22070	-1	f	f
2409797	2411585	CLJU_c22080 CLJU_c22090	-1	f	f
2411968	2416538	CLJU_c22100 CLJU_c22110 CLJU_c22120 CLJU_c22130	-1	t	f
2416836	2417043	CLJU_c22140	-1	t	f
2417139	2419741	CLJU_c22150 CLJU_c22160 CLJU_c22170	-1	t	f
2420242	2422430	CLJU_c22180 CLJU_c22190	-1	t	f
2421956	2423582	CLJU_c22200	1	t	f
2423777	2424953	CLJU_c22210	1	t	f
2423777	2426497	CLJU_c22220 CLJU_c22230	-1	t	f
2426920	2436127	CLJU_c22240 CLJU_c22250 CLJU_c22260 CLJU_c22270 CLJU_c22280 CLJU_c22290 CLJU_c22300 CLJU_c22310 CLJU_c22320	-1	t	f
2436212	2439122	CLJU_c22330	-1	f	f
2439222	2444255	CLJU_c22340 CLJU_c22350	-1	f	f
242960	249212	CLJU_c02360 CLJU_c02370 CLJU_c02380 CLJU_c02390 CLJU_c02400 CLJU_c02410 CLJU_c02420 CLJU_c02430	1	f	f
2444772	2448444	CLJU_c22360	-1	t	f
2448544	2449012	CLJU_c22370	-1	f	f
2449579	2450059	CLJU_c22380	-1	t	f
2450557	2453038	CLJU_c22390	-1	t	f
2454443	2454770	CLJU_c22400	-1	f	f
2454895	2455225	CLJU_c22410	-1	t	f
2455361	2458493	CLJU_c22420	-1	f	f
2459142	2459469	CLJU_c22430	-1	f	f
2459533	2459857	CLJU_c22440	-1	f	f
2459993	2463143	CLJU_c22450	-1	f	f
2463256	2464069	CLJU_c22460	-1	f	f
2464762	2465020	CLJU_c22470	-1	f	f
2465909	2466536	CLJU_c22480	-1	t	f
2466716	2467169	CLJU_c22490	-1	f	f
2467238	2468873	CLJU_c22500	-1	f	f
24695	25259	CLJU_c00220	-1	f	f
24695	26405	CLJU_c00230 CLJU_c00240	1	f	f
2469609	2469993	CLJU_c22510	-1	f	f
2470620	2472737	CLJU_c22520 CLJU_c22530	-1	t	f
2472837	2474388	CLJU_c22540	-1	f	f
2474451	2476180	CLJU_c22550 CLJU_c22560	-1	f	f
2476124	2480313	CLJU_c22570 CLJU_c22580 CLJU_c22590 CLJU_c22600	-1	f	f
2480420	2481515	CLJU_c22610 CLJU_c22620	-1	f	f
2481701	2483302	CLJU_c22630 CLJU_c22640	-1	t	f
2483387	2486740	CLJU_c22650 CLJU_c22660 CLJU_c22670	-1	f	f
2487257	2488679	CLJU_c22680	-1	f	f
2488997	2490114	CLJU_c22690 CLJU_c22700	-1	t	f
2490832	2492194	CLJU_c22710	-1	t	f
249278	249677	CLJU_c02440	1	t	f
2493404	2494589	CLJU_c22740	-1	f	f
2494662	2495772	CLJU_c22750	-1	f	f
2494662	2497574	CLJU_c22760	1	t	f
2496017	2499116	CLJU_c22770 CLJU_c22780	-1	t	f
2498732	2500044	CLJU_c22790	1	t	f
2499339	2502392	CLJU_c22800 CLJU_c22810	-1	f	f
250016	250754	CLJU_c02450	1	f	f
2502520	2502847	CLJU_c22820	-1	f	f
2502945	2503383	CLJU_c22830	-1	t	f
2503497	2504280	CLJU_c22840	-1	f	f
2503497	2505420	CLJU_c22850	1	t	f
2504589	2506719	CLJU_c22860	-1	t	f
2506886	2507237	CLJU_c22870	-1	t	f
2506886	2509845	CLJU_c22880	1	t	f
250848	252108	CLJU_c02460	1	t	f
2510020	2511096	CLJU_c22890 CLJU_c22900	1	t	f
2510574	2512919	CLJU_c22910	-1	t	f
2511203	2517477	CLJU_c22920 CLJU_c22930 CLJU_c22940 CLJU_c22950 CLJU_c22960	1	f	f
2516097	2517941	CLJU_c22970	-1	f	f
2518080	2520498	CLJU_c22980	-1	f	f
2518080	2521824	CLJU_c22990	1	f	f
2520714	2524061	CLJU_c23000 CLJU_c23010	-1	f	f
252292	253339	CLJU_c02470	1	t	f
2524206	2525454	CLJU_c23020	-1	f	f
2525602	2536605	CLJU_c23030 CLJU_c23040 CLJU_c23050 CLJU_c23060 CLJU_c23070 CLJU_c23080 CLJU_c23090 CLJU_c23100 CLJU_c23110 CLJU_c23120	-1	f	f
253490	254207	CLJU_c02480	1	f	f
2536951	2537926	CLJU_c23130	-1	f	f
2536951	2538637	CLJU_c23140	1	f	f
2538778	2539345	CLJU_c23150	1	f	f
2538778	2540352	CLJU_c23160 CLJU_c23170	-1	t	f
2539791	2542936	CLJU_c23180	1	t	f
2541514	2544355	CLJU_c23190	-1	t	f
2542972	2545921	CLJU_c23200	1	f	f
254429	254684	CLJU_c02490	1	f	f
2544943	2547645	CLJU_c23210	-1	f	f
2547791	2548865	CLJU_c23220	-1	t	f
254781	255813	CLJU_c02500	1	f	f
254781	256453	CLJU_c02520	-1	f	f
2549055	2552307	CLJU_c23230 CLJU_c23240	-1	f	f
2551005	2555050	CLJU_c23250 CLJU_c23260	1	t	f
2553385	2559999	CLJU_c23270 CLJU_c23280 CLJU_c23290	-1	t	f
255904	256596	CLJU_c02510	1	f	f
2560240	2562715	CLJU_c23300	-1	f	f
2562795	2565213	CLJU_c23310	-1	f	f
2565432	2566248	CLJU_c23320	-1	t	f
2565432	2567363	CLJU_c23330 CLJU_c23340	1	f	f
2567000	2567650	CLJU_c23350	-1	f	f
256702	257140	CLJU_c02530 CLJU_c02540 CLJU_c02550 CLJU_c02560 CLJU_c02570	1	f	t
2567554	2568390	CLJU_c23360	1	f	f
2568544	2568727	CLJU_c23370	1	f	f
2568544	2571300	CLJU_c23380 CLJU_c23390	-1	f	f
2570130	2571858	CLJU_c23400	1	t	f
2572186	2572978	CLJU_c23410	1	f	f
2572186	2574706	CLJU_c23420	-1	f	f
257489	258665	CLJU_c02580	1	t	f
2575291	2576710	CLJU_c23430	-1	t	f
2577189	2578602	CLJU_c23440	-1	t	f
2577189	2580125	CLJU_c23450	1	t	f
2579450	2581391	CLJU_c23460	-1	t	f
2581449	2583654	CLJU_c23470	-1	f	f
2584164	2584644	CLJU_c23480	-1	t	f
2584704	2585271	CLJU_c23490	-1	f	f
2585395	2585551	CLJU_c23500	-1	f	f
2586079	2589821	CLJU_c23510 CLJU_c23520 CLJU_c23530	-1	t	f
258795	262692	CLJU_c02590 CLJU_c02600 CLJU_c02610	1	t	f
2589917	2591189	CLJU_c23540	-1	t	f
2591411	2592143	CLJU_c23550	-1	f	f
2592720	2593677	CLJU_c23560	-1	t	f
2593784	2596104	CLJU_c23570 CLJU_c23580	-1	f	f
2596186	2599843	CLJU_c23590 CLJU_c23600 CLJU_c23610	-1	f	f
2599960	2606993	CLJU_c23620 CLJU_c23630 CLJU_c23640 CLJU_c23650 CLJU_c23660 CLJU_c23670 CLJU_c23680	-1	f	f
2607167	2608850	CLJU_c23690	-1	f	f
2607167	2609498	CLJU_c23700	1	f	f
2609096	2617402	CLJU_c23710 CLJU_c23720 CLJU_c23730 CLJU_c23740 CLJU_c23750 CLJU_c23760 CLJU_c23770	-1	t	f
2617568	2619654	CLJU_c23780 CLJU_c23790	-1	t	f
2619949	2627759	CLJU_c23800 CLJU_c23810 CLJU_c23820 CLJU_c23830 CLJU_c23840	-1	t	f
2626562	2629836	CLJU_c23850	1	f	f
2629993	2631181	CLJU_c23860	1	f	f
263124	263652	CLJU_c02620	1	f	f
2631605	2633210	CLJU_c23870	1	f	f
2631605	2639767	CLJU_c23880 CLJU_c23890 CLJU_c23900 CLJU_c23910	-1	f	f
263832	266346	CLJU_c02630	1	f	f
2639873	2640800	CLJU_c23920	-1	f	f
2640913	2641501	CLJU_c23930	-1	f	f
2641600	2643310	CLJU_c23940	-1	f	f
2643587	2645012	CLJU_c23950	-1	t	f
2645077	2646361	CLJU_c23960	-1	f	f
2646787	2652745	CLJU_c23970 CLJU_c23980 CLJU_c23990 CLJU_c24000 CLJU_c24010	-1	f	f
2652875	2653301	CLJU_c24020	-1	f	f
2653358	2655841	CLJU_c24030 CLJU_c24040	-1	f	f
2656107	2658831	CLJU_c24050	-1	f	f
2659026	2660925	CLJU_c24060	-1	t	f
2661028	2667210	CLJU_c24070 CLJU_c24080 CLJU_c24090 CLJU_c24100 CLJU_c24110 CLJU_c24120	-1	f	f
266484	267474	CLJU_c02640	1	f	f
2667424	2670154	CLJU_c24130	-1	f	f
2670507	2672406	CLJU_c24140	-1	t	f
26719	27394	CLJU_c00250 CLJU_c00260	1	f	f
2672923	2677233	CLJU_c24150 CLJU_c24160 CLJU_c24170 CLJU_c24180	-1	f	f
267553	268792	CLJU_c02650	1	f	f
2677562	2678831	CLJU_c24190	-1	t	f
2679269	2682440	CLJU_c24200 CLJU_c24210	-1	t	f
2681606	2684003	CLJU_c24220	1	f	f
2683019	2685362	CLJU_c24230	-1	f	f
2685876	2686872	CLJU_c24240	-1	f	f
2685876	2689556	CLJU_c24250 CLJU_c24260	1	t	f
2688821	2691149	CLJU_c24270 CLJU_c24280	-1	t	f
268951	270298	CLJU_c02660	1	f	f
268951	271731	CLJU_c02670	-1	f	f
2690810	2691710	CLJU_c24290	1	f	f
2691305	2693738	CLJU_c24300 CLJU_c24310	-1	f	f
2693976	2695329	CLJU_c24320	-1	t	f
2693976	2696824	CLJU_c24330	1	f	f
2695906	2698216	CLJU_c24340	-1	f	f
2696920	2701675	CLJU_c24350 CLJU_c24360	1	f	f
2700172	2704522	CLJU_c24370 CLJU_c24380 CLJU_c24390	-1	t	f
270390	274058	CLJU_c02680	1	t	f
2705101	2708700	CLJU_c24400 CLJU_c24410 CLJU_c24420 CLJU_c24430	-1	t	f
2708914	2710069	CLJU_c24440	-1	t	f
2710210	2710987	CLJU_c24450	-1	f	f
2710210	2712677	CLJU_c24460	1	f	f
2712809	2713744	CLJU_c24470 CLJU_c24480	1	t	f
2714017	2716316	CLJU_c24490 CLJU_c24500	1	f	f
2716429	2717659	CLJU_c24510	1	f	f
2716429	2719334	CLJU_c24520 CLJU_c24530	-1	f	f
2719927	2720668	CLJU_c24540	-1	f	f
2721057	2721699	CLJU_c24550	-1	f	f
2721617	2722124	CLJU_c24560	-1	f	f
2722894	2723509	CLJU_c24570	-1	f	f
2723771	2725285	CLJU_c24580 CLJU_c24590 CLJU_c24600	-1	f	f
2725542	2726013	CLJU_c24610	-1	f	f
2726142	2727179	CLJU_c24620 CLJU_c24630	-1	f	f
2727806	2729759	CLJU_c24640	-1	f	f
2730057	2731634	CLJU_c24650 CLJU_c24660	-1	f	f
2731777	2732785	CLJU_c24670	-1	f	f
2731777	2733912	CLJU_c24680	1	f	f
2732991	2738379	CLJU_c24690 CLJU_c24700	-1	t	f
2738693	2739014	CLJU_c24710	-1	t	f
2739080	2742811	CLJU_c24720 CLJU_c24730 CLJU_c24740	-1	f	f
2743106	2744825	CLJU_c24750	-1	f	f
2743106	2745592	CLJU_c24760	1	f	f
2745385	2747644	CLJU_c24770	-1	f	f
2745649	2748477	CLJU_c24780	1	f	f
274605	275232	CLJU_c02690	1	t	f
2747931	2749718	CLJU_c24790	-1	f	f
2749955	2751517	CLJU_c24800 CLJU_c24810 CLJU_c24820	-1	f	f
2751768	2753177	CLJU_c24830 CLJU_c24840	-1	f	f
2752658	2755326	CLJU_c24850	1	f	f
275346	277185	CLJU_c02700	1	f	f
2755564	2756620	CLJU_c24860	1	t	f
2757226	2759125	CLJU_c24870	1	t	f
2759375	2760542	CLJU_c24880	1	f	f
2759375	2763467	CLJU_c24890 CLJU_c24900	-1	f	f
2763686	2763953	CLJU_c24910	-1	f	f
2764082	2764913	CLJU_c24920	-1	f	f
2765109	2766018	CLJU_c24930	-1	f	f
2765109	2767278	CLJU_c24940	1	f	f
2766561	2768738	CLJU_c24950 CLJU_c24960	-1	t	f
27677	28085	CLJU_c00270	1	f	f
2769255	2770371	CLJU_c24970	-1	t	f
2770449	2771625	CLJU_c24980	-1	f	f
2771711	2772824	CLJU_c24990	-1	f	f
2771711	2774715	CLJU_c25000	1	f	f
277259	278217	CLJU_c02710 CLJU_c02720	1	f	f
2773149	2775555	CLJU_c25010	-1	f	f
277530	279064	CLJU_c02730	-1	f	f
2775652	2775922	CLJU_c25020	-1	f	f
2775652	2777297	CLJU_c25030	1	f	f
2776268	2778964	CLJU_c25040 CLJU_c25050 CLJU_c25060	-1	f	f
2779035	2779305	CLJU_c25070	-1	f	f
2779605	2781540	CLJU_c25080	-1	t	f
2781655	2783862	CLJU_c25090 CLJU_c25100	-1	f	f
278260	280040	CLJU_c02740	1	t	f
2784323	2786175	CLJU_c25110 CLJU_c25120 CLJU_c25130	-1	f	f
2786361	2786814	CLJU_c25140	-1	f	f
2786361	2787667	CLJU_c25150	1	f	f
2787846	2789759	CLJU_c25160 CLJU_c25170	1	t	f
2788232	2790933	CLJU_c25180	-1	t	f
2791058	2791964	CLJU_c25190	-1	f	f
2791058	2793831	CLJU_c25200	1	f	f
279251	282551	CLJU_c02750	-1	f	f
2792694	2799393	CLJU_c25210 CLJU_c25220 CLJU_c25230	-1	f	f
2799684	2803984	CLJU_c25240 CLJU_c25250 CLJU_c25260 CLJU_c25270	-1	t	f
2803525	2804366	CLJU_c25280	1	f	f
2804069	2804958	CLJU_c25290	-1	f	f
2805083	2805782	CLJU_c25300	-1	f	f
2805881	2807207	CLJU_c25310	-1	f	f
2807657	2812667	CLJU_c25320 CLJU_c25330 CLJU_c25340 CLJU_c25350 CLJU_c25360	-1	f	f
2813108	2813981	CLJU_c25370	-1	t	f
2814628	2817807	CLJU_c25380 CLJU_c25390 CLJU_c25400 CLJU_c25410	-1	f	f
28155	28335	CLJU_c00280	1	f	f
2818471	2818972	CLJU_c25420	-1	t	f
2818471	2820031	CLJU_c25430	1	f	f
2820667	2826524	CLJU_c25440 CLJU_c25450 CLJU_c25460 CLJU_c25470 CLJU_c25480	1	f	f
2825735	2829192	CLJU_c25490	-1	f	f
2829335	2830166	CLJU_c25500	-1	f	f
282980	283055	CLJU_c02760	-1	f	t
2830342	2830774	CLJU_c25510	-1	f	f
2830342	2831646	CLJU_c25520	1	f	f
283131	285664	CLJU_c02770 CLJU_c02780 CLJU_c02790 CLJU_c02800	-1	f	f
2831797	2832046	CLJU_c25530	1	t	f
2831797	2832538	CLJU_c25540	-1	t	f
2832343	2834127	CLJU_c25550	1	f	f
2833449	2835341	CLJU_c25560	-1	f	f
2835619	2835763	CLJU_c25570	-1	f	f
2836167	2836518	CLJU_c25580	-1	t	f
2836588	2837788	CLJU_c25590	-1	f	f
2837997	2838285	CLJU_c25600	-1	f	f
2838387	2840228	CLJU_c25610 CLJU_c25620	-1	f	f
2840357	2840735	CLJU_c25630	-1	t	f
2840911	2841307	CLJU_c25640	-1	f	f
2840911	2841733	CLJU_c25650	1	f	f
2842176	2843091	CLJU_c25660	1	f	f
2842176	2848507	CLJU_c25670 CLJU_c25680 CLJU_c25690 CLJU_c25700 CLJU_c25710	-1	f	f
28436	29180	CLJU_c00290	1	f	f
2848842	2849526	CLJU_c25720	-1	t	f
2849809	2850785	CLJU_c25730 CLJU_c25740	-1	f	f
2850380	2852698	CLJU_c25750 CLJU_c25760	1	f	f
2852871	2855587	CLJU_c25770 CLJU_c25780	1	f	f
2853625	2856698	CLJU_c25790	-1	f	f
2856806	2858180	CLJU_c25800	-1	f	f
285791	286724	CLJU_c02810	-1	t	f
2858345	2859362	CLJU_c25810	-1	f	f
2859570	2864773	CLJU_c25820 CLJU_c25830 CLJU_c25840 CLJU_c25850 CLJU_c25860	-1	f	f
2863321	2866755	CLJU_c25870	1	f	f
2865159	2870259	CLJU_c25880 CLJU_c25890 CLJU_c25900 CLJU_c25910	-1	f	f
2869728	2871554	CLJU_c25920 CLJU_c25930	1	t	f
287063	288136	CLJU_c02820 CLJU_c02830	-1	f	f
2871822	2872500	CLJU_c25940	1	t	f
2872720	2873275	CLJU_c25950	1	t	f
2872720	2877487	CLJU_c25960 CLJU_c25970 CLJU_c25980	-1	t	f
287440	290025	CLJU_c02840	1	t	f
2878107	2879422	CLJU_c25990 CLJU_c26000 CLJU_c26010	-1	f	f
2879636	2880515	CLJU_c26020	-1	f	f
2880714	2885985	CLJU_c26030	-1	t	f
2887013	2887991	CLJU_c26040	-1	t	f
2888062	2889989	CLJU_c26050 CLJU_c26060 CLJU_c26070	-1	t	f
2889551	2890933	CLJU_c26080	1	f	f
2890168	2892849	CLJU_c26090	-1	f	f
2893012	2893507	CLJU_c26100	-1	f	f
2893647	2900535	CLJU_c26110 CLJU_c26120 CLJU_c26130 CLJU_c26140 CLJU_c26150 CLJU_c26160	-1	t	f
2899707	2901856	CLJU_c26170	1	f	f
2900824	2903557	CLJU_c26180 CLJU_c26190	-1	f	f
290200	290947	CLJU_c02850	1	t	f
290200	293315	CLJU_c02860 CLJU_c02870	-1	t	f
2903765	2904521	CLJU_c26200	-1	t	f
2903765	2905041	CLJU_c26210	1	f	f
2904627	2905873	CLJU_c26220	-1	f	f
2905024	2909578	CLJU_c26230 CLJU_c26240	1	f	f
2907742	2910680	CLJU_c26250	-1	f	f
2911566	2916940	CLJU_c26260 CLJU_c26270 CLJU_c26280 CLJU_c26290 CLJU_c26300 CLJU_c26310	-1	f	f
2917145	2917859	CLJU_c26320	-1	t	f
2917926	2918868	CLJU_c26330	-1	f	f
2917926	2919540	CLJU_c26340	1	f	f
2918997	2920248	CLJU_c26350	-1	t	f
2919600	2920861	CLJU_c26360	1	f	f
2920525	2922716	CLJU_c26370 CLJU_c26380	-1	f	f
2922889	2923354	CLJU_c26390	-1	t	f
2922889	2924123	CLJU_c26400	1	f	f
2923487	2924753	CLJU_c26410	-1	f	f
2924159	2927266	CLJU_c26420 CLJU_c26430 CLJU_c26440	1	f	f
2926816	2929499	CLJU_c26450 CLJU_c26460 CLJU_c26470	-1	f	f
2928365	2930918	CLJU_c26480	1	f	f
2931512	2932944	CLJU_c26490 CLJU_c26500	1	t	f
2932092	2935385	CLJU_c26510 CLJU_c26520 CLJU_c26530	-1	f	f
2934386	2939272	CLJU_c26540 CLJU_c26550 CLJU_c26560	1	t	f
293451	295360	CLJU_c02880 CLJU_c02890	-1	f	f
2938204	2940413	CLJU_c26570	-1	t	f
293851	296151	CLJU_c02900	1	f	f
2940532	2943073	CLJU_c26580 CLJU_c26590 CLJU_c26600	-1	t	f
2943147	2943738	CLJU_c26610	-1	f	f
2943839	2945288	CLJU_c26620	-1	f	f
2945438	2946608	CLJU_c26630	-1	f	f
2946706	2947618	CLJU_c26640	-1	f	f
2947879	2948101	CLJU_c26650	-1	f	f
2947879	2949252	CLJU_c26660	1	f	f
2949323	2950490	CLJU_c26670	1	f	f
2949323	2951293	CLJU_c26680	-1	f	f
2950588	2952831	CLJU_c26690	1	t	f
2952003	2954251	CLJU_c26700	-1	t	f
2952871	2955205	CLJU_c26710	1	f	f
2954386	2957457	CLJU_c26720	-1	f	f
2957753	2958611	CLJU_c26730	-1	t	f
295782	296726	CLJU_c02910	-1	t	f
2958934	2960596	CLJU_c26740	-1	t	f
2960734	2961653	CLJU_c26750 CLJU_c26760	-1	f	f
2961407	2963053	CLJU_c26770	1	f	f
296204	297774	CLJU_c02920	1	f	f
2963123	2965444	CLJU_c26780 CLJU_c26790	1	f	f
2964322	2966228	CLJU_c26800	-1	f	f
29658	30426	CLJU_c00300	1	f	f
2966294	2967413	CLJU_c26810	-1	f	f
2967634	2968756	CLJU_c26820	-1	f	f
2967634	2969666	CLJU_c26830	1	f	f
2969066	2970207	CLJU_c26840	-1	f	f
2970310	2972030	CLJU_c26850 CLJU_c26860 CLJU_c26870	-1	f	f
2972147	2972630	CLJU_c26880	-1	f	f
2972147	2973485	CLJU_c26890	1	f	f
2972879	2975269	CLJU_c26900 CLJU_c26910	-1	f	f
2975397	2976410	CLJU_c26920 CLJU_c26930	-1	f	f
2975933	2976942	CLJU_c26940	1	f	f
2976603	2978329	CLJU_c26950	-1	f	f
2977279	2979772	CLJU_c26960	1	f	f
2978641	2980124	CLJU_c26970	-1	f	f
297897	298326	CLJU_c02930	1	t	f
2980320	2981283	CLJU_c26980	-1	f	f
2981465	2982164	CLJU_c26990 CLJU_c27000 CLJU_c27010	-1	f	f
2981936	2983004	CLJU_c27020	1	f	f
2983296	2984679	CLJU_c27030	1	f	f
2983296	2987015	CLJU_c27040 CLJU_c27050	-1	f	f
298463	299360	CLJU_c02940	1	f	f
2987073	2989156	CLJU_c27060 CLJU_c27070	-1	f	f
2989458	2990262	CLJU_c27080	-1	f	f
2990789	2992673	CLJU_c27090	-1	f	f
2992833	2993361	CLJU_c27100	-1	f	f
2993766	2995128	CLJU_c27110	-1	f	f
299438	300140	CLJU_c02950	1	f	f
299438	302369	CLJU_c02960	-1	f	f
2995212	2995650	CLJU_c27120	-1	f	f
2995212	3000398	CLJU_c27130 CLJU_c27140 CLJU_c27150	1	f	f
3000499	3002353	CLJU_c27160 CLJU_c27170 CLJU_c27180	1	f	f
3002435	3005704	CLJU_c27190 CLJU_c27200	1	f	f
3003115	3006521	CLJU_c27210	-1	f	f
300524	304325	CLJU_c02970	1	t	f
3006077	3007184	CLJU_c27220	1	t	f
3006929	3008767	CLJU_c27230	-1	t	f
3009980	3010385	CLJU_c27240	-1	f	f
3010514	3011090	CLJU_c27250	-1	f	f
3010514	3013018	CLJU_c27260	1	t	f
3011314	3014243	CLJU_c27270	-1	t	f
3014966	3015057	CLJU_c27280	-1	f	t
3015870	3017025	CLJU_c27290	-1	f	f
3017087	3018626	CLJU_c27300	-1	f	f
3018721	3019198	CLJU_c27310	-1	f	f
3019305	3020591	CLJU_c27320 CLJU_c27330	-1	f	f
3020686	3022177	CLJU_c27340	-1	f	f
3022253	3024908	CLJU_c27350 CLJU_c27360	-1	f	f
3025170	3025509	CLJU_c27370	-1	f	f
3025170	3027011	CLJU_c27380	1	t	f
3028379	3028739	CLJU_c27390	1	f	f
3028845	3029115	CLJU_c27400	1	f	f
3029559	3030372	CLJU_c27410	1	f	f
3030439	3031189	CLJU_c27420	1	f	f
3030439	3031678	CLJU_c27430	-1	f	f
3033668	3033884	CLJU_c27460	-1	f	f
3034262	3034808	CLJU_c27470	-1	f	f
3035267	3035714	CLJU_c27480	-1	f	f
3036248	3037283	CLJU_c27490	-1	f	f
3038115	3040021	CLJU_c27500 CLJU_c27510	-1	f	f
3039460	3043177	CLJU_c27520 CLJU_c27530	1	f	f
3042604	3044292	CLJU_c27540	-1	t	f
304443	305133	CLJU_c02980	1	f	f
3044738	3046013	CLJU_c27550	-1	f	f
3046483	3047593	CLJU_c27560	-1	f	f
3046483	3049043	CLJU_c27570	1	t	f
3048848	3050197	CLJU_c27580	-1	f	f
3050847	3051567	CLJU_c27590	-1	f	f
3050847	3052148	CLJU_c27600	1	f	f
3051695	3057414	CLJU_c27610 CLJU_c27620 CLJU_c27630 CLJU_c27640	-1	f	f
305368	305719	CLJU_c02990	1	f	f
3057607	3061341	CLJU_c27650 CLJU_c27660 CLJU_c27670 CLJU_c27680	-1	f	f
305845	307721	CLJU_c03000 CLJU_c03010	1	f	f
3061627	3061718	CLJU_c27690	-1	f	t
3061887	3065200	CLJU_c27700 CLJU_c27710	-1	f	f
30646	31343	CLJU_c00310 CLJU_c00320	1	f	f
3065416	3066352	CLJU_c27720	-1	f	f
3066627	3067782	CLJU_c27730	-1	f	f
3067878	3068769	CLJU_c27740	-1	f	f
3068894	3070021	CLJU_c27750 CLJU_c27760	-1	f	f
3070343	3071498	CLJU_c27770	-1	f	f
3071586	3073122	CLJU_c27780	-1	f	f
3073224	3075008	CLJU_c27790 CLJU_c27800 CLJU_c27810	-1	f	f
3075103	3076594	CLJU_c27820	-1	f	f
3076703	3079357	CLJU_c27830 CLJU_c27840	-1	f	f
3078031	3080588	CLJU_c27850	1	f	f
307816	308425	CLJU_c03020	1	f	f
3080988	3082035	CLJU_c27860	1	t	f
3080988	3082360	CLJU_c27870	-1	t	f
3082805	3083309	CLJU_c27880	-1	f	f
3083427	3087848	CLJU_c27890 CLJU_c27900 CLJU_c27910 CLJU_c27920 CLJU_c27930	-1	f	f
3087955	3090133	CLJU_c27940 CLJU_c27950	-1	f	f
3090344	3091988	CLJU_c27960	-1	t	f
3092588	3093194	CLJU_c27970	-1	t	f
3093501	3094587	CLJU_c27980	-1	f	f
309427	310064	CLJU_c03030 CLJU_c03040	1	f	f
3094808	3096263	CLJU_c27990	-1	t	f
3096620	3098590	CLJU_c28000 CLJU_c28010	-1	f	f
3099110	3101104	CLJU_c28020 CLJU_c28030	-1	f	f
3101254	3102094	CLJU_c28040	-1	f	f
3102175	3103591	CLJU_c28050	-1	f	f
310239	312005	CLJU_c03050 CLJU_c03060	1	t	f
3103763	3105867	CLJU_c28060 CLJU_c28070	-1	f	f
3106682	3107978	CLJU_c28080	-1	f	f
3108173	3109058	CLJU_c28090	-1	f	f
3109216	3111914	CLJU_c28100 CLJU_c28110	-1	f	f
3112214	3113570	CLJU_c28120	-1	f	f
3113834	3115184	CLJU_c28130	-1	t	f
3115373	3116135	CLJU_c28140	-1	f	f
3116207	3116663	CLJU_c28150	-1	f	f
3116823	3118149	CLJU_c28160	-1	t	f
3116	8919	CLJU_c00040 CLJU_c00050 CLJU_c00060 CLJU_c00070	1	t	f
3118567	3119914	CLJU_c28170	-1	t	f
3120144	3120594	CLJU_c28180	-1	f	f
3120774	3122223	CLJU_c28190	-1	f	f
312191	313758	CLJU_c03070 CLJU_c03080	1	t	f
3122282	3123155	CLJU_c28200	-1	t	f
3123262	3125348	CLJU_c28210 CLJU_c28220	-1	f	f
3124196	3126492	CLJU_c28230	1	t	f
3126623	3131502	CLJU_c28240 CLJU_c28250 CLJU_c28260	-1	f	t
3132082	3132256	CLJU_c28270	-1	f	f
3132082	3133485	CLJU_c28280	1	f	f
3132459	3137306	CLJU_c28290 CLJU_c28300 CLJU_c28310 CLJU_c28320	-1	f	f
3137528	3138701	CLJU_c28330	-1	f	f
3137528	3139178	CLJU_c28340	1	f	f
3138836	3141504	CLJU_c28350 CLJU_c28360	-1	f	f
313931	315107	CLJU_c03090	1	t	f
3140367	3142553	CLJU_c28370	1	f	f
3141833	3143213	CLJU_c28380	-1	t	f
3143374	3144103	CLJU_c28390	-1	f	f
3144346	3148554	CLJU_c28400 CLJU_c28410	-1	f	f
3148639	3149824	CLJU_c28420	-1	t	f
3149897	3151226	CLJU_c28430	-1	f	f
3151391	3151700	CLJU_c28440 CLJU_c28450 CLJU_c28460	-1	f	t
3151975	3152149	CLJU_c28470	-1	f	f
315210	321358	CLJU_c03100 CLJU_c03110 CLJU_c03120	1	f	f
3152299	3154046	CLJU_c28480 CLJU_c28490	-1	t	f
31534	32198	CLJU_c00330 CLJU_c00340	1	f	f
3154264	3154408	CLJU_c28500	-1	f	f
3154264	3155433	CLJU_c28510	1	f	f
3154731	3157391	CLJU_c28520 CLJU_c28530	-1	t	f
3157557	3158736	CLJU_c28540	-1	f	f
3159038	3159998	CLJU_c28550	-1	t	f
3160081	3160732	CLJU_c28560	-1	t	f
3160839	3162357	CLJU_c28570	-1	f	f
3162495	3162693	CLJU_c28580	-1	f	f
3162933	3164601	CLJU_c28590 CLJU_c28600	-1	f	f
3165161	3166673	CLJU_c28610	-1	t	f
3166788	3167079	CLJU_c28620	-1	f	f
3167210	3170668	CLJU_c28630 CLJU_c28640 CLJU_c28650 CLJU_c28660 CLJU_c28670	-1	f	f
3170828	3171746	CLJU_c28680	-1	t	f
3171915	3172887	CLJU_c28690	-1	f	f
3173202	3174513	CLJU_c28700	-1	f	f
3174854	3176054	CLJU_c28710	-1	f	f
3176298	3179136	CLJU_c28720 CLJU_c28730	-1	f	f
3179197	3181195	CLJU_c28740	-1	f	f
3181412	3183102	CLJU_c28750 CLJU_c28760	-1	f	f
3182334	3184302	CLJU_c28770	1	f	f
3183390	3187947	CLJU_c28780 CLJU_c28790 CLJU_c28800 CLJU_c28810	-1	f	f
3188020	3191517	CLJU_c28820 CLJU_c28830 CLJU_c28840 CLJU_c28850	-1	f	f
3191582	3191759	CLJU_c28860	-1	f	f
3191900	3194377	CLJU_c28870 CLJU_c28880 CLJU_c28890	-1	f	f
3193780	3195450	CLJU_c28900 CLJU_c28910	1	f	f
3195772	3196237	CLJU_c28920	1	f	f
3195772	3196810	CLJU_c28930	-1	f	f
3197077	3198503	CLJU_c28940 CLJU_c28950	-1	f	f
3198574	3199441	CLJU_c28960	-1	f	f
3198574	3200401	CLJU_c28970 CLJU_c28980 CLJU_c28990	1	f	f
3200119	3201464	CLJU_c29000	-1	f	f
3201964	3202399	CLJU_c29010	-1	t	f
3202535	3202715	CLJU_c29020	-1	f	f
3202936	3203332	CLJU_c29030	-1	f	f
3202936	3204972	CLJU_c29040	1	f	f
3203541	3207054	CLJU_c29050	-1	f	f
3207198	3208713	CLJU_c29060	-1	f	f
3209435	3211601	CLJU_c29070	-1	f	f
3211802	3212561	CLJU_c29080	-1	t	f
3212865	3214028	CLJU_c29090 CLJU_c29100	-1	f	f
3214210	3222083	CLJU_c29110 CLJU_c29120 CLJU_c29130 CLJU_c29140 CLJU_c29150 CLJU_c29160 CLJU_c29170 CLJU_c29180	-1	f	f
321427	324555	CLJU_c03130 CLJU_c03140 CLJU_c03150	1	f	f
3222284	3222443	CLJU_c29190	-1	t	f
3222284	3224012	CLJU_c29200	1	t	f
3222737	3225160	CLJU_c29210	-1	t	f
3225284	3228145	CLJU_c29220 CLJU_c29230	-1	f	f
3226078	3230261	CLJU_c29240 CLJU_c29250	1	f	f
3230433	3231492	CLJU_c29260	1	f	f
3231683	3232727	CLJU_c29270	1	f	f
3231683	3233427	CLJU_c29280	-1	f	f
3233637	3236255	CLJU_c29290 CLJU_c29300 CLJU_c29310	-1	t	f
3234926	3236803	CLJU_c29320	1	f	f
3236380	3237637	CLJU_c29330	-1	f	f
3236845	3242000	CLJU_c29340	1	t	f
3238475	3242340	CLJU_c29350	-1	t	f
3242172	3244317	CLJU_c29360	1	f	f
3242538	3245968	CLJU_c29370 CLJU_c29380	-1	f	f
32429	33335	CLJU_c00350	1	f	f
32429	34031	CLJU_c00360	-1	f	f
3245182	3247332	CLJU_c29390	1	f	f
3246150	3248202	CLJU_c29400	-1	f	f
324697	327192	CLJU_c03160 CLJU_c03170	1	f	f
3248384	3248918	CLJU_c29410	-1	f	f
3249191	3249815	CLJU_c29420	-1	f	f
3249191	3252145	CLJU_c29430 CLJU_c29440	1	f	f
3251452	3253830	CLJU_c29450	-1	f	f
3252492	3254743	CLJU_c29460	1	f	f
3254104	3256007	CLJU_c29470	-1	f	f
3256150	3256513	CLJU_c29480	-1	f	f
3256578	3259098	CLJU_c29490	-1	f	f
3259322	3260039	CLJU_c29500 CLJU_c29510	-1	f	f
3260344	3260707	CLJU_c29520	-1	t	f
3260807	3261095	CLJU_c29530	-1	f	f
3261475	3262444	CLJU_c29540	-1	f	f
3262684	3263246	CLJU_c29550 CLJU_c29560	-1	f	f
3263425	3264112	CLJU_c29570	-1	f	f
3264239	3264896	CLJU_c29580	-1	f	f
3265052	3265493	CLJU_c29590	-1	f	f
3265052	3269758	CLJU_c29600 CLJU_c29610 CLJU_c29620 CLJU_c29630	1	t	f
3268609	3271287	CLJU_c29640	-1	t	f
3271379	3272612	CLJU_c29650 CLJU_c29660	-1	f	f
3271976	3273928	CLJU_c29670	1	f	f
3272779	3276941	CLJU_c29680 CLJU_c29690 CLJU_c29700	-1	t	f
327396	328311	CLJU_c03180	1	f	f
3277323	3278706	CLJU_c29710	-1	t	f
3279122	3279317	CLJU_c29720	-1	t	f
3279122	3283072	CLJU_c29730	1	f	f
3283146	3283452	CLJU_c29740	1	t	f
3283146	3284117	CLJU_c29750	-1	t	f
3284208	3285432	CLJU_c29760	-1	f	f
3284208	3286043	CLJU_c29770	1	f	f
328432	331606	CLJU_c03190 CLJU_c03200 CLJU_c03210	1	f	f
3285581	3286665	CLJU_c29780	-1	f	f
3286764	3287328	CLJU_c29790	-1	f	f
3286764	3288017	CLJU_c29800	1	t	f
3287606	3288271	CLJU_c29810	-1	t	f
3288611	3288836	CLJU_c29820	-1	f	f
3288611	3289886	CLJU_c29830	1	f	f
3288986	3291964	CLJU_c29840	-1	f	f
3289969	3292728	CLJU_c29850	1	f	f
3292176	3294013	CLJU_c29860	-1	f	f
3294085	3295487	CLJU_c29870 CLJU_c29880	-1	f	f
3294971	3296791	CLJU_c29890	1	t	f
3295756	3302543	CLJU_c29900 CLJU_c29910 CLJU_c29920 CLJU_c29930 CLJU_c29940	-1	t	f
3302618	3310145	CLJU_c29950 CLJU_c29960 CLJU_c29970 CLJU_c29980 CLJU_c29990 CLJU_c30000	-1	f	f
3309017	3311400	CLJU_c30010	1	t	f
3310749	3312391	CLJU_c30020	-1	t	f
3311470	3313892	CLJU_c30030	1	f	f
3312722	3318389	CLJU_c30040 CLJU_c30050 CLJU_c30060	-1	f	f
3317312	3318750	CLJU_c30070	1	f	f
3319030	3321722	CLJU_c30080 CLJU_c30090 CLJU_c30100	1	f	f
3321161	3322577	CLJU_c30110	-1	f	f
3323030	3323999	CLJU_c30120	-1	f	f
3324386	3329290	CLJU_c30130 CLJU_c30140 CLJU_c30150 CLJU_c30160	-1	f	f
332927	336404	CLJU_c03240	1	f	f
3330011	3333971	CLJU_c30170 CLJU_c30180	-1	t	f
3334439	3335537	CLJU_c30190	-1	f	f
3334439	3336892	CLJU_c30200	1	f	f
3337151	3338432	CLJU_c30210	1	f	f
3337151	3345736	CLJU_c30220 CLJU_c30230 CLJU_c30240 CLJU_c30250 CLJU_c30260	-1	f	f
3343603	3348112	CLJU_c30270 CLJU_c30280	1	f	f
3347377	3348361	CLJU_c30290	-1	f	f
3348459	3349515	CLJU_c30300	-1	f	f
3349826	3351302	CLJU_c30310	-1	f	f
33506	34629	CLJU_c00370	1	f	f
3351578	3354953	CLJU_c30320	-1	f	f
3355096	3356097	CLJU_c30330 CLJU_c30340	-1	f	f
3356177	3356675	CLJU_c30350	-1	f	f
3356752	3357766	CLJU_c30360	-1	f	f
3356752	3358611	CLJU_c30370	1	f	f
3358673	3359692	CLJU_c30380 CLJU_c30390	1	f	f
3358957	3361023	CLJU_c30400	-1	t	f
3361164	3362026	CLJU_c30410 CLJU_c30420	-1	f	f
3362624	3364619	CLJU_c30430	-1	f	f
3365271	3366642	CLJU_c30440	-1	f	f
336619	339364	CLJU_c03250 CLJU_c03260	1	t	f
3366745	3367858	CLJU_c30450	-1	t	f
3367942	3369880	CLJU_c30460	-1	f	f
3369969	3372702	CLJU_c30470 CLJU_c30480 CLJU_c30490	-1	f	f
3372863	3374027	CLJU_c30500	-1	f	f
3374904	3375579	CLJU_c30510	-1	t	f
3374904	3376854	CLJU_c30520	1	t	f
3376999	3378370	CLJU_c30530	1	f	f
3376999	3379575	CLJU_c30540	-1	f	f
3379709	3382057	CLJU_c30550 CLJU_c30560	-1	f	f
3380341	3382586	CLJU_c30570	1	f	f
3382646	3382886	CLJU_c30580	1	f	f
3382646	3383801	CLJU_c30590	-1	f	f
3383045	3384871	CLJU_c30600	1	t	f
3384037	3386303	CLJU_c30610	-1	t	f
3385136	3389384	CLJU_c30620 CLJU_c30630 CLJU_c30640	1	f	f
3389522	3392267	CLJU_c30650 CLJU_c30660	1	f	f
3392583	3392868	CLJU_c30670	1	f	f
3393095	3394004	CLJU_c30680	1	t	f
3393095	3398483	CLJU_c30690	-1	f	f
3394133	3399437	CLJU_c30700	1	t	f
339635	341066	CLJU_c03270	1	f	f
3399778	3399973	CLJU_c30710	1	f	f
3399778	3400727	CLJU_c30720	-1	f	f
3400064	3401432	CLJU_c30730	1	f	f
3400844	3406019	CLJU_c30740 CLJU_c30750 CLJU_c30760	-1	f	f
3404843	3407853	CLJU_c30770	1	f	f
3406287	3408674	CLJU_c30780	-1	f	f
3408920	3409502	CLJU_c30790	-1	f	f
3408920	3410099	CLJU_c30800	1	f	f
3409892	3411015	CLJU_c30810	-1	f	f
3411295	3411523	CLJU_c30820	-1	f	f
3411295	3412360	CLJU_c30830	1	f	f
3412582	3412765	CLJU_c30840	1	f	f
3412582	3414347	CLJU_c30850	-1	f	f
3412919	3415324	CLJU_c30860	1	f	f
341365	341705	CLJU_c03280 CLJU_c03290	1	f	f
3414472	3416398	CLJU_c30870	-1	f	f
3415528	3417130	CLJU_c30880	1	f	f
3416602	3417566	CLJU_c30890	-1	f	f
3417802	3418264	CLJU_c30900	-1	f	f
3418392	3418527	CLJU_c30910	-1	f	f
3418392	3419642	CLJU_c30920	1	f	f
3419420	3420033	CLJU_c30930	-1	f	f
341960	350155	CLJU_c03300 CLJU_c03310 CLJU_c03320 CLJU_c03330	1	t	f
3419718	3421401	CLJU_c30940	1	f	f
3420834	3421895	CLJU_c30950	-1	f	f
3422263	3422458	CLJU_c30960	-1	f	f
3422263	3423953	CLJU_c30970	1	f	f
3422828	3424691	CLJU_c30980 CLJU_c30990	-1	t	f
3424535	3425599	CLJU_c31000	1	f	f
3425708	3426416	CLJU_c31010	1	f	f
34263	36351	CLJU_c00380 CLJU_c00390	-1	f	f
3426480	3427206	CLJU_c31020	1	f	f
3427320	3427809	CLJU_c31030	1	f	f
3427320	3429160	CLJU_c31040	-1	f	f
3427987	3429702	CLJU_c31050	1	f	f
3429504	3430826	CLJU_c31060	-1	f	f
3430990	3431455	CLJU_c31070	-1	f	f
3431565	3436116	CLJU_c31080 CLJU_c31090 CLJU_c31100 CLJU_c31110 CLJU_c31120 CLJU_c31130 CLJU_c31140	-1	f	f
3436494	3444628	CLJU_c31150 CLJU_c31160 CLJU_c31170 CLJU_c31180 CLJU_c31190 CLJU_c31200 CLJU_c31210 CLJU_c31220	-1	f	f
3444709	3445321	CLJU_c31230	-1	f	f
3445577	3455434	CLJU_c31240 CLJU_c31250 CLJU_c31260 CLJU_c31270 CLJU_c31280 CLJU_c31290 CLJU_c31300 CLJU_c31310 CLJU_c31320 CLJU_c31330 CLJU_c31340 CLJU_c31350 CLJU_c31360 CLJU_c31370 CLJU_c31380	-1	f	f
3455512	3456106	CLJU_c31390	-1	t	f
3456211	3457036	CLJU_c31400	-1	f	f
3457112	3458009	CLJU_c31410	-1	f	f
3457112	3458321	CLJU_c31420	1	f	f
3458111	3458657	CLJU_c31430 CLJU_c31440	-1	f	f
3458456	3459394	CLJU_c31450 CLJU_c31460	1	f	f
3458992	3461577	CLJU_c31470 CLJU_c31480	-1	f	f
3461795	3461996	CLJU_c31490	-1	f	f
3462610	3465307	CLJU_c31500 CLJU_c31510 CLJU_c31520	-1	t	f
3465402	3465939	CLJU_c31530	-1	f	f
3466186	3466330	CLJU_c31540	-1	f	f
3466186	3467159	CLJU_c31550 CLJU_c31560	1	f	f
3466817	3468304	CLJU_c31570	-1	f	f
3468553	3469604	CLJU_c31580 CLJU_c31590	-1	f	f
3469750	3476799	CLJU_c31600 CLJU_c31610 CLJU_c31620 CLJU_c31630 CLJU_c31640 CLJU_c31650 CLJU_c31660 CLJU_c31670 CLJU_c31680 CLJU_c31690 CLJU_c31700	-1	f	f
3476858	3477089	CLJU_c31710	-1	f	f
3476858	3478118	CLJU_c31720 CLJU_c31730	1	f	f
3478243	3479425	CLJU_c31740	1	t	f
3479511	3479586	CLJU_c31750	-1	f	t
3479800	3480364	CLJU_c31760	1	f	f
3480192	3481172	CLJU_c31770 CLJU_c31780	1	f	f
3481439	3482916	CLJU_c31790 CLJU_c31800	1	f	f
3482121	3483276	CLJU_c31810	-1	f	f
3483723	3484239	CLJU_c31820	-1	f	f
3484374	3487615	CLJU_c31830 CLJU_c31840 CLJU_c31850 CLJU_c31860	-1	f	f
3487673	3490134	CLJU_c31870 CLJU_c31880 CLJU_c31890	-1	f	f
3490292	3494360	CLJU_c31900 CLJU_c31910 CLJU_c31920 CLJU_c31930 CLJU_c31940	-1	f	f
3494450	3503605	CLJU_c31950 CLJU_c31960 CLJU_c31970 CLJU_c31980 CLJU_c31990 CLJU_c32000 CLJU_c32010 CLJU_c32020	-1	f	f
3504065	3505594	CLJU_c32030 CLJU_c32040	-1	t	f
350564	351053	CLJU_c03340	1	f	f
3505693	3507690	CLJU_c32050 CLJU_c32060	-1	f	f
3506241	3512268	CLJU_c32070 CLJU_c32080	1	t	f
3510108	3513465	CLJU_c32090	-1	f	f
351168	353391	CLJU_c03350 CLJU_c03360 CLJU_c03370 CLJU_c03380	1	t	f
3513988	3514810	CLJU_c32100	-1	f	f
3513988	3516193	CLJU_c32110	1	f	f
3516358	3517525	CLJU_c32120	1	f	f
3516358	3519402	CLJU_c32130 CLJU_c32140	-1	f	f
3519506	3521984	CLJU_c32150	-1	f	f
3519506	3522641	CLJU_c32160	1	f	f
3522717	3523437	CLJU_c32170	1	f	f
3522717	3524618	CLJU_c32180	-1	f	f
3524045	3525769	CLJU_c32190	1	t	f
3524788	3526117	CLJU_c32200	-1	f	f
3525889	3527265	CLJU_c32210	1	f	f
3526509	3527932	CLJU_c32220	-1	f	f
3527320	3529346	CLJU_c32230	1	f	f
3528095	3529952	CLJU_c32240	-1	t	f
3529391	3530691	CLJU_c32250	1	f	f
3530779	3531196	CLJU_c32260	1	f	f
3531255	3531768	CLJU_c32270	1	f	f
3532052	3532349	CLJU_c32280	1	f	f
3532052	3533898	CLJU_c32290	-1	f	f
3533601	3535071	CLJU_c32300	1	f	f
353468	355418	CLJU_c03390	1	f	f
3535193	3535478	CLJU_c32310	1	f	f
3535589	3536030	CLJU_c32320	1	f	f
3536114	3537354	CLJU_c32330 CLJU_c32340	1	f	f
3537845	3538178	CLJU_c32350	1	f	f
3538329	3538560	CLJU_c32360	1	f	f
3538643	3539070	CLJU_c32370 CLJU_c32380	1	f	f
3538902	3539481	CLJU_c32390	-1	t	f
3539175	3541074	CLJU_c32400	1	f	f
3540174	3542679	CLJU_c32410 CLJU_c32420	-1	f	f
3542139	3545832	CLJU_c32430 CLJU_c32440	1	f	f
3545082	3548598	CLJU_c32450 CLJU_c32460	-1	f	f
35487	40182	CLJU_c00400	1	f	f
3548828	3549947	CLJU_c32470	-1	f	f
3550072	3550633	CLJU_c32480	-1	f	f
3550072	3552639	CLJU_c32490 CLJU_c32500 CLJU_c32510 CLJU_c32520	1	f	f
3552771	3554475	CLJU_c32530	1	f	f
3554568	3555310	CLJU_c32540 CLJU_c32550	1	f	f
355533	359103	CLJU_c03400 CLJU_c03410 CLJU_c03420	1	f	f
3555393	3556625	CLJU_c32560 CLJU_c32570 CLJU_c32580	1	t	f
3557019	3558240	CLJU_c32590	1	f	f
3557019	3560034	CLJU_c32600	-1	f	f
3560668	3561643	CLJU_c32610	-1	f	f
3561743	3563285	CLJU_c32620	-1	f	f
3563399	3564638	CLJU_c32630	-1	f	f
3565881	3566501	CLJU_c32640 CLJU_c32650	-1	f	f
3566677	3571812	CLJU_c32660 CLJU_c32670 CLJU_c32680	-1	f	f
3571876	3575419	CLJU_c32690	-1	t	f
3575484	3579662	CLJU_c32700 CLJU_c32710	-1	f	f
3579742	3580351	CLJU_c32720	-1	f	f
3580565	3581477	CLJU_c32730	-1	t	f
3581899	3581986	CLJU_c32740	-1	f	t
3582089	3583121	CLJU_c32750	-1	f	f
3583220	3583862	CLJU_c32760	-1	f	f
3584004	3584370	CLJU_c32770	-1	t	f
3584475	3585267	CLJU_c32780	-1	f	f
3585423	3586866	CLJU_c32790	-1	f	f
3587259	3587842	CLJU_c32800 CLJU_c32810	-1	f	f
3588229	3588655	CLJU_c32820	-1	t	f
3588831	3589980	CLJU_c32830	-1	f	f
3590235	3594034	CLJU_c32840 CLJU_c32850 CLJU_c32860 CLJU_c32870	-1	t	f
359323	361591	CLJU_c03430 CLJU_c03440 CLJU_c03450 CLJU_c03460	1	t	f
3594236	3595880	CLJU_c32880	-1	t	f
3594236	3597830	CLJU_c32890	1	t	f
3596447	3600580	CLJU_c32900 CLJU_c32910 CLJU_c32920 CLJU_c32930	-1	t	f
3600773	3601358	CLJU_c32940	-1	t	f
3601523	3605360	CLJU_c32950 CLJU_c32960 CLJU_c32970 CLJU_c32980	-1	t	f
3604106	3606272	CLJU_c32990	1	f	f
3605537	3609110	CLJU_c33000 CLJU_c33010 CLJU_c33020	-1	f	f
3609321	3609735	CLJU_c33030	-1	t	f
3609321	3613711	CLJU_c33040 CLJU_c33050 CLJU_c33060 CLJU_c33070	1	f	f
3612466	3614900	CLJU_c33080 CLJU_c33090	-1	f	f
3615077	3616448	CLJU_c33100	-1	f	f
3615077	3617282	CLJU_c33110	1	t	f
361705	362083	CLJU_c03470	1	f	f
3617629	3618589	CLJU_c33120	1	f	f
3619076	3620542	CLJU_c33130 CLJU_c33140	1	f	f
3620876	3622589	CLJU_c33150	1	f	f
3620876	3626729	CLJU_c33160	-1	f	f
362359	363604	CLJU_c03480	1	f	f
3626844	3627909	CLJU_c33170	-1	t	f
3628282	3629773	CLJU_c33180	-1	t	f
3628282	3631435	CLJU_c33190	1	f	f
3630283	3632712	CLJU_c33200	-1	f	f
3632993	3633845	CLJU_c33210	-1	f	f
3633917	3634901	CLJU_c33220	-1	f	f
3633917	3635585	CLJU_c33230	1	f	f
3636035	3636239	CLJU_c33240	1	t	f
3636035	3637928	CLJU_c33250 CLJU_c33260	-1	t	f
363672	363984	CLJU_c03490	1	f	f
3637244	3639748	CLJU_c33270	1	f	f
3639873	3641181	CLJU_c33280	1	f	f
3639873	3642578	CLJU_c33290 CLJU_c33300	-1	f	f
3641705	3643936	CLJU_c33310 CLJU_c33320	1	f	f
364223	364940	CLJU_c03500	1	f	f
3644250	3646407	CLJU_c33330	1	f	f
3644250	3647593	CLJU_c33340 CLJU_c33350	-1	f	f
3646990	3648100	CLJU_c33360	1	f	f
3648251	3649064	CLJU_c33370	1	f	f
3648251	3650033	CLJU_c33380	-1	f	f
3650277	3650754	CLJU_c33390	-1	f	f
3650277	3652240	CLJU_c33400 CLJU_c33410 CLJU_c33420	1	f	f
365098	370840	CLJU_c03510 CLJU_c03520 CLJU_c03530 CLJU_c03540 CLJU_c03550 CLJU_c03560	1	f	f
3651667	3653483	CLJU_c33430	-1	f	f
3653788	3656403	CLJU_c33440 CLJU_c33450 CLJU_c33460 CLJU_c33470	-1	t	f
3655086	3658687	CLJU_c33480	1	t	f
3656683	3660446	CLJU_c33490	-1	t	f
3660700	3662011	CLJU_c33500	-1	f	f
3660700	3663007	CLJU_c33510	1	t	f
3662281	3665264	CLJU_c33520 CLJU_c33530	-1	t	f
3665991	3666479	CLJU_c33540 CLJU_c33550	-1	t	f
3666272	3668261	CLJU_c33560	1	f	f
3668325	3669363	CLJU_c33570	1	t	f
3669538	3669623	CLJU_c33580	-1	f	t
3669677	3670223	CLJU_c33590	-1	f	f
3670284	3673563	CLJU_c33600 CLJU_c33610	-1	f	f
3670932	3674539	CLJU_c33620	1	f	f
3673888	3675188	CLJU_c33630	-1	f	f
3675582	3676221	CLJU_c33640	-1	f	f
3675582	3677083	CLJU_c33650	1	f	f
3676414	3680355	CLJU_c33660 CLJU_c33670	-1	f	f
3680433	3681864	CLJU_c33680	-1	f	f
3682399	3685677	CLJU_c33690 CLJU_c33700 CLJU_c33710	-1	f	f
3685783	3686302	CLJU_c33720	-1	t	f
3686403	3687252	CLJU_c33730	-1	f	f
3687410	3689562	CLJU_c33740 CLJU_c33750	-1	t	f
3689704	3691072	CLJU_c33760	-1	f	f
3691157	3691295	CLJU_c33770	-1	t	f
3691393	3691762	CLJU_c33780	-1	f	f
3691822	3696035	CLJU_c33790 CLJU_c33800 CLJU_c33810 CLJU_c33820 CLJU_c33830	-1	f	f
3696223	3696826	CLJU_c33840	-1	f	f
3696886	3697711	CLJU_c33850	-1	f	f
3696886	3698822	CLJU_c33860	1	t	f
3698003	3700039	CLJU_c33870	-1	t	f
3700292	3700937	CLJU_c33880	-1	f	f
3701220	3702642	CLJU_c33890	-1	t	f
3702784	3703681	CLJU_c33900	-1	t	f
3703836	3705624	CLJU_c33910	-1	f	f
3703836	3706454	CLJU_c33920	1	t	f
3705932	3707183	CLJU_c33930	-1	f	f
3706505	3709652	CLJU_c33940	1	t	f
3707300	3711273	CLJU_c33950 CLJU_c33960 CLJU_c33970	-1	t	f
371005	372060	CLJU_c03570 CLJU_c03580 CLJU_c03590	1	f	f
3711710	3713474	CLJU_c33980	-1	f	f
3711710	3714495	CLJU_c33990	1	f	f
3714630	3715044	CLJU_c34000	1	f	f
3714630	3716478	CLJU_c34010 CLJU_c34020	-1	f	f
3716583	3720285	CLJU_c34030 CLJU_c34040 CLJU_c34050	-1	f	f
3720680	3723797	CLJU_c34060 CLJU_c34070 CLJU_c34080	-1	f	f
372127	374895	CLJU_c03600 CLJU_c03610 CLJU_c03620 CLJU_c03630 CLJU_c03640 CLJU_c03650	1	f	f
3723865	3726315	CLJU_c34090 CLJU_c34100	-1	f	f
3726396	3729184	CLJU_c34110 CLJU_c34120	-1	f	f
3729364	3736918	CLJU_c34130 CLJU_c34140 CLJU_c34150 CLJU_c34160 CLJU_c34170 CLJU_c34180	-1	f	f
3737157	3740944	CLJU_c34190 CLJU_c34200 CLJU_c34210	-1	t	f
3739216	3742669	CLJU_c34220	1	f	f
3742989	3744853	CLJU_c34230 CLJU_c34240	1	f	f
3743551	3746358	CLJU_c34250 CLJU_c34260	-1	f	f
3746779	3747208	CLJU_c34270	-1	f	f
3747331	3747613	CLJU_c34280	-1	f	f
3747670	3747859	CLJU_c34290	-1	f	f
3747972	3749196	CLJU_c34300	-1	f	f
3749646	3750216	CLJU_c34310	-1	t	f
3750640	3751996	CLJU_c34320 CLJU_c34330	-1	t	f
375096	378571	CLJU_c03660 CLJU_c03670	1	f	f
3752205	3753516	CLJU_c34340	-1	f	f
3752205	3754181	CLJU_c34350	1	f	f
3753710	3755427	CLJU_c34360	-1	t	f
3755567	3758407	CLJU_c34370 CLJU_c34380	-1	f	f
3758463	3760833	CLJU_c34390	-1	f	f
3760915	3761515	CLJU_c34400	-1	f	f
3761677	3764059	CLJU_c34410	-1	t	f
3764604	3765618	CLJU_c34420	-1	f	f
3765966	3766749	CLJU_c34430	-1	t	f
3766827	3767954	CLJU_c34440 CLJU_c34450 CLJU_c34460	-1	t	f
3768153	3770067	CLJU_c34470	-1	t	f
3770735	3771620	CLJU_c34480	-1	t	f
3771949	3772330	CLJU_c34490 CLJU_c34500 CLJU_c34510 CLJU_c34520	1	f	t
3772470	3773133	CLJU_c34530	-1	f	f
3772470	3774412	CLJU_c34540	1	t	f
3773260	3775269	CLJU_c34550	-1	f	f
3775407	3776289	CLJU_c34560	-1	f	f
3776345	3777338	CLJU_c34570	-1	f	f
3776345	3778223	CLJU_c34580	1	f	f
3778359	3780020	CLJU_c34590 CLJU_c34600	1	f	f
3780154	3780871	CLJU_c34610	1	f	f
3780154	3781711	CLJU_c34620	-1	t	f
3781788	3782286	CLJU_c34630	-1	f	f
3782450	3783203	CLJU_c34640	-1	f	f
3782450	3783921	CLJU_c34650	1	f	f
3783393	3784816	CLJU_c34660	-1	f	f
3783925	3785211	CLJU_c34670	1	f	f
3784959	3787120	CLJU_c34680	-1	f	f
378649	379477	CLJU_c03680	1	t	f
3787291	3789940	CLJU_c34690	-1	f	f
3790326	3790731	CLJU_c34700	-1	t	f
3790934	3791765	CLJU_c34710	-1	f	f
3791830	3793396	CLJU_c34720	-1	f	f
3791830	3794850	CLJU_c34730	1	f	f
3793743	3795876	CLJU_c34740	-1	f	f
379585	382568	CLJU_c03690 CLJU_c03700	1	f	f
3796502	3797438	CLJU_c34750	-1	f	f
3796502	3799427	CLJU_c34760 CLJU_c34770	1	t	f
3799685	3801005	CLJU_c34780	1	f	f
3801138	3802275	CLJU_c34790	1	f	f
3801138	3802592	CLJU_c34800	-1	f	f
3802776	3803016	CLJU_c34810	-1	f	f
3802776	3804305	CLJU_c34820 CLJU_c34830	1	f	f
3803555	3807951	CLJU_c34840 CLJU_c34850 CLJU_c34860	-1	t	f
3808028	3809021	CLJU_c34870	-1	t	f
3809497	3811275	CLJU_c34880 CLJU_c34890 CLJU_c34900	-1	f	f
3811519	3812897	CLJU_c34910 CLJU_c34920	-1	f	f
3813176	3814339	CLJU_c34930 CLJU_c34940	-1	f	f
3814480	3815287	CLJU_c34950	-1	f	f
3815443	3815683	CLJU_c34960	-1	t	f
3816089	3816260	CLJU_c34970	-1	f	f
3816089	3817233	CLJU_c34980	1	f	f
3816825	3818324	CLJU_c34990 CLJU_c35000	-1	f	f
3817781	3818992	CLJU_c35010	1	f	f
3818527	3819885	CLJU_c35020	-1	f	f
3819006	3821495	CLJU_c35030	1	f	f
3821594	3822068	CLJU_c35040	1	t	f
3822509	3823079	CLJU_c35050	1	f	f
3823023	3823854	CLJU_c35060	1	f	f
3823023	3825317	CLJU_c35070	-1	f	f
3825432	3825870	CLJU_c35080	-1	f	f
3825432	3826853	CLJU_c35090	1	f	f
3826061	3827196	CLJU_c35100	-1	f	f
382750	383677	CLJU_c03710	1	f	f
3827510	3827933	CLJU_c35110	-1	f	f
3828029	3828879	CLJU_c35120 CLJU_c35130	-1	f	f
3828549	3829828	CLJU_c35140	1	f	f
3829048	3830972	CLJU_c35150	-1	f	f
3831410	3837824	CLJU_c35160	-1	t	f
3831410	3840290	CLJU_c35170 CLJU_c35180	1	f	f
383802	385155	CLJU_c03720	1	f	f
3840469	3841868	CLJU_c35190 CLJU_c35200	1	f	f
3841948	3842665	CLJU_c35210	1	f	f
3841948	3843153	CLJU_c35220	-1	f	f
3843373	3845212	CLJU_c35230	-1	t	f
3845560	3846118	CLJU_c35240	-1	t	f
3845560	3846596	CLJU_c35250	1	f	f
3846353	3847521	CLJU_c35260	-1	f	f
3847627	3849512	CLJU_c35270 CLJU_c35280 CLJU_c35290	-1	f	f
3849778	3849943	CLJU_c35300	-1	t	f
3849778	3851648	CLJU_c35310	1	f	f
3850010	3851916	CLJU_c35320	-1	f	f
385219	386628	CLJU_c03730 CLJU_c03740 CLJU_c03750	1	f	f
3852294	3856590	CLJU_c35330	-1	f	f
3852294	3858609	CLJU_c35340 CLJU_c35350	1	f	f
3857805	3859388	CLJU_c35360 CLJU_c35370	-1	f	f
3859256	3859952	CLJU_c35380	1	f	f
3859592	3861182	CLJU_c35390	-1	t	f
3861252	3863387	CLJU_c35400 CLJU_c35410	-1	f	f
3862136	3865150	CLJU_c35420	1	f	f
3865382	3865952	CLJU_c35430	1	f	f
3865382	3866430	CLJU_c35440	-1	f	f
3866679	3867144	CLJU_c35450	-1	t	f
3866679	3868434	CLJU_c35460	1	f	f
3868534	3869179	CLJU_c35470	1	f	f
386893	390160	CLJU_c03760 CLJU_c03770	1	f	f
3869921	3870830	CLJU_c35480	1	f	f
3869921	3871065	CLJU_c35490	-1	f	f
3871146	3871341	CLJU_c35500	-1	f	f
3871634	3874700	CLJU_c35510 CLJU_c35520 CLJU_c35530 CLJU_c35540	-1	f	f
3874106	3875551	CLJU_c35550	1	t	f
3875128	3876838	CLJU_c35560	-1	f	f
3875611	3877891	CLJU_c35570	1	f	f
3876949	3878995	CLJU_c35580	-1	t	f
3878041	3879605	CLJU_c35590	1	t	f
3879230	3880397	CLJU_c35600	-1	f	f
3880474	3883404	CLJU_c35610 CLJU_c35620	-1	f	f
3883509	3885403	CLJU_c35630 CLJU_c35640	-1	t	f
3885547	3886840	CLJU_c35650	-1	t	f
3887146	3887932	CLJU_c35660	-1	f	f
3887993	3888773	CLJU_c35670	-1	t	f
3889205	3890679	CLJU_c35680 CLJU_c35690	-1	f	f
3890758	3891511	CLJU_c35700	-1	f	f
3891588	3893868	CLJU_c35710 CLJU_c35720 CLJU_c35730	-1	f	f
3894076	3894832	CLJU_c35740	-1	t	f
3894977	3896506	CLJU_c35750 CLJU_c35760	-1	f	f
3897038	3898301	CLJU_c35770	-1	f	f
3898550	3899306	CLJU_c35780	-1	f	f
3899465	3900359	CLJU_c35790	-1	f	f
3900441	3900606	CLJU_c35800	-1	f	f
3900769	3901075	CLJU_c35810	-1	f	f
3901161	3901257	CLJU_c35820	-1	f	f
3901491	3901854	CLJU_c35830	-1	f	f
3901927	3902191	CLJU_c35840	-1	f	f
3901927	3903681	CLJU_c35850	1	f	f
3903752	3904394	CLJU_c35860	1	f	f
3903752	3910218	CLJU_c35870 CLJU_c35880 CLJU_c35890 CLJU_c35900 CLJU_c35910	-1	f	f
390385	393348	CLJU_c03780 CLJU_c03790	1	f	f
3910309	3912835	CLJU_c35920 CLJU_c35930	-1	f	f
3913003	3914209	CLJU_c35940	-1	f	f
3913003	3918652	CLJU_c35950 CLJU_c35960 CLJU_c35970 CLJU_c35980	1	f	f
3917563	3918806	CLJU_c35990	-1	f	f
3919183	3921895	CLJU_c36000 CLJU_c36010 CLJU_c36020	-1	f	f
3923298	3924115	CLJU_c36030 CLJU_c36040	-1	f	f
3924261	3925449	CLJU_c36050	-1	f	f
3924261	3926797	CLJU_c36060	1	f	f
3925849	3927049	CLJU_c36070	-1	f	f
3927111	3927759	CLJU_c36080	-1	f	f
3927111	3928310	CLJU_c36090	1	t	f
3927899	3929632	CLJU_c36100	-1	t	f
3929913	3930885	CLJU_c36110	-1	f	f
3931102	3931291	CLJU_c36120	-1	f	f
3931102	3931912	CLJU_c36130	1	f	f
3932128	3932542	CLJU_c36140	1	f	f
3932645	3933557	CLJU_c36150	1	f	f
3932645	3934710	CLJU_c36160 CLJU_c36170	-1	f	f
3934137	3936790	CLJU_c36180	1	f	f
3935080	3937803	CLJU_c36190	-1	t	f
393633	394959	CLJU_c03800	1	f	f
393633	396978	CLJU_c03810	-1	f	f
3936948	3939825	CLJU_c36200	1	f	f
3938112	3940508	CLJU_c36210	-1	t	f
3939908	3941001	CLJU_c36220	1	f	f
3941307	3944604	CLJU_c36230 CLJU_c36240 CLJU_c36250	1	f	f
3943566	3945344	CLJU_c36260	-1	f	f
3945443	3945627	CLJU_c36270 CLJU_c36280	-1	f	f
3945719	3947069	CLJU_c36290	-1	f	f
3947684	3949256	CLJU_c36300	-1	f	f
3950108	3950975	CLJU_c36310	-1	f	f
3951118	3952258	CLJU_c36320	-1	f	f
395190	401647	CLJU_c03820 CLJU_c03830 CLJU_c03840 CLJU_c03850	1	f	f
3953852	3955236	CLJU_c36330 CLJU_c36340	-1	f	f
3955993	3957523	CLJU_c36350	-1	f	f
3955993	3958620	CLJU_c36360	1	f	f
3959302	3959482	CLJU_c36370	1	f	f
3959302	3961532	CLJU_c36380	-1	f	f
3961599	3962169	CLJU_c36390	-1	f	f
3962578	3963499	CLJU_c36400	-1	f	f
3964259	3965348	CLJU_c36410	-1	f	f
3966103	3966370	CLJU_c36420	-1	t	f
3967649	3968111	CLJU_c36430	-1	t	f
3968254	3968923	CLJU_c36440	-1	f	f
3969023	3970523	CLJU_c36450	-1	t	f
3970843	3972805	CLJU_c36460	-1	f	f
3972997	3973618	CLJU_c36470	-1	f	f
3973787	3974192	CLJU_c36480	-1	f	f
3974324	3976175	CLJU_c36490 CLJU_c36500	-1	f	f
3976259	3976946	CLJU_c36510 CLJU_c36520	-1	f	f
3977220	3979644	CLJU_c36530	-1	f	f
3980048	3981395	CLJU_c36540	-1	f	f
3981610	3986744	CLJU_c36550 CLJU_c36560 CLJU_c36570 CLJU_c36580 CLJU_c36590 CLJU_c36600 CLJU_c36610	-1	f	f
3986956	3987520	CLJU_c36620	-1	f	f
3987698	3989173	CLJU_c36630 CLJU_c36640 CLJU_c36650 CLJU_c36660	-1	f	f
3988972	3991532	CLJU_c36670 CLJU_c36680	1	f	f
3991621	3993009	CLJU_c36690 CLJU_c36700 CLJU_c36710 CLJU_c36720 CLJU_c36730 CLJU_c36740 CLJU_c36750 CLJU_c36760 CLJU_c36770 CLJU_c36780 CLJU_c36790 CLJU_c36800 CLJU_c36810 CLJU_c36820 CLJU_c36830	-1	f	t
3993128	3995991	CLJU_c36840 CLJU_c36850 CLJU_c36860 CLJU_c36870	-1	f	f
3995001	3997489	CLJU_c36880	1	f	f
3996067	3999473	CLJU_c36890	-1	f	f
3997856	3999825	CLJU_c36900	1	f	f
3999618	4003801	CLJU_c36910 CLJU_c36920 CLJU_c36930 CLJU_c36940	-1	f	f
4003935	4005984	CLJU_c36950	-1	f	f
4006049	4006319	CLJU_c36960	-1	f	f
4006672	4010940	CLJU_c36970 CLJU_c36980	-1	f	f
4011107	4011401	CLJU_c36990	-1	t	f
4011693	4012428	CLJU_c37000	-1	t	f
4012723	4013398	CLJU_c37010	-1	t	f
4013467	4015093	CLJU_c37020	-1	f	f
4013467	4015800	CLJU_c37030	1	f	f
4015909	4016617	CLJU_c37040	1	f	f
4016681	4017407	CLJU_c37050	1	f	f
401744	404044	CLJU_c03860 CLJU_c03870	1	t	f
4017521	4018010	CLJU_c37060	1	f	f
4017521	4019361	CLJU_c37070	-1	f	f
4019674	4020067	CLJU_c37080	-1	f	f
[truncated: 733 more rows]

## Sheet: Table 4
Location	Modification	Source (modification)	Catalyst	Gene	Source (Catalyst)	Included in C. ljungdahlii model?	In E. coli?
955	Y	Genetic evidence for protein carrying out modificationa	RluC_mono	CLJU_c17350	Functional homology	No - 67% sequence identity 10+/- bp around location	Yes
1911	Y	Genetic evidence for protein carrying out modificationb & sequence alignment of 23S rRNA region with bacteria containing this modification	RluD_mono	CLJU_c10720	Functional & sequence homology	Yes	Yes
1915	m3Y	Genetic evidence for protein carrying out modificationb,c & sequence alignment of 23S rRNA region with bacteria containing this modification	RlmH_mono & RluD_mono	CLJU_c17400 & CLJU_c10720	Functional & sequence homology	Yes	Yes
1917	Y	Genetic evidence for protein carrying out modificationb & sequence alignment of 23S rRNA region with bacteria containing this modification	RluD_mono	CLJU_c10720	Functional & sequence homology	Yes	Yes
2251	Gm	Genetic evidence for protein carrying out modificationd & sequence alignment of 23S rRNA region with bacteria containing this modification	RlmB_mono	CLJU_c41250	Functional & sequence homology	Yes	Yes
2503	m2A	Genetic evidence for protein carrying out modificatione & sequence alignment of 23S rRNA region with bacteria containing this modification	RlmN_mono_mod_1:4fe4s	CLJU_c12600	Functional & sequence homology	Yes	Yes
2504	Y	Genetic evidence for protein carrying out modificationa & sequence alignment of 23S rRNA region with bacteria containing this modification	RluC_mono	CLJU_c17350	Functional homology	Yes	Yes
2580	Y	Genetic evidence for protein carrying out modificationa & sequence alignment of 23S rRNA region with bacteria containing this modification	RluC_mono	CLJU_c17350	Functional homology	Yes	Yes
2605	Y	Genetic evidence for protein carrying out modificationf & sequence alignment of 23S rRNA region with bacteria containing this modification	RluB_mono	CLJU_c21360	Functional homology	Yes	Yes
aConrad J et al. 1998 J Biol Chem
bLeppik et al. 2007 FEBS J
cEro et al. 2010 RNA
dLovgren JM & Wikstrom PM. 2001 J bacteriol
eToh et al. 2008 RNA
fDel Campo M, Kaya Y, Ofengand J. 2001 RNA

## Sheet: Table 5
Location	Modification	Source (modification)	Catalyst	Gene	Source (Catalyst)	Included in C. ljungdahlii model?
516	Y	Genetic evidence for protein carrying out modificationb,c & sequence alignment of 16S rRNA region with bacteria containing this modification	RsuA_mono	CLJU_c37000	Functional & sequence homology	Yes
527	m7G	Genetic evidence for protein carrying out modificationb,c & sequence alignment of 16S rRNA region with bacteria containing this modification	GidB_mono	CLJU_c42900	Functional & sequence homology	Yes
966	m22G	Genetic evidence for protein carrying out modificationb,c & sequence alignment of 16S rRNA region with bacteria containing this modification	RsmD_mono	CLJU_c12710	Functional & sequence homology	Yes
967	m5C	Genetic evidence for protein carrying out modificationb,c & sequence alignment of 16S rRNA region with bacteria containing this modification	RsmB_mono	CLJU_c12590	Functional & sequence homology	Yes
1195	Cm	Sequence alignment of 16S rRNA region with bacteria containing this modification	RsmH_mono	CLJU_c10540	Can't seem to find a protein for this modification through scanning of functional annotation & sequence comparison. There are many potential methlytransferases, but will use CLJU_c10540 as a place holder for now	Yes
1211 || 1212	Dihydrouridine	Sequence alignment of 16S rRNA region with bacteria containing this modification	DusI_mono_mod_1:fad	CLJU_c38790	tRNA dihydrouridine synthase as placeholder protein	Yes
1211 || 1212	Dihydrouridine	Sequence alignment of 16S rRNA region with bacteria containing this modification	DusII_mono_mod_1:fad	CLJU_c41510	tRNA dihydrouridine synthase as placeholder protein	Yes
1402	m4Cm	Genetic evidence for protein carrying out modificationb,c & sequence alignment of 16S rRNA region with bacteria containing this modification	RsmI_mono	CLJU_c01480	Functional & sequence homology	Yes
1402	m4Cm	Genetic evidence for protein carrying out modificationb,c & sequence alignment of 16S rRNA region with bacteria containing this modification	RsmH_mono	CLJU_c10540	Functional & sequence homology	Yes
1409	m5C	Sequence alignment of 16S rRNA region with bacteria containing this modification	RsmB_mono	CLJU_c12590	Can't seem to find a protein for this modification through scanning of functional annotation & sequence comparison. There are many potential methlytransferases, but will use CLJU_c12590 as a place holder for now	Yes
1498	m3U	Genetic evidence for protein carrying out modificationb,c & sequence alignment of 16S rRNA region with bacteria containing this modification	RsmE_mono	CLJU_c08010 (Peg.765)	Functional & sequence homology	Yes
1518	m62A	Genetic evidence for protein carrying out modificationa	RsmA_mono	CLJU_c01770 (Peg.158)	Functional & sequence homology	Yes – but no sequence alignment
1519	m62A	Genetic evidence for protein carrying out modificationa	RsmA_mono	CLJU_c01770 (Peg.158)	Functional & sequence homology	Yes – but no sequence alignment

## Sheet: Table 6
Reaction_name	Complexes	Metabolites
Y_at_1911	RluD_mono
m3Y_at_1915	RlmH_dim AND RluD_mono	amet_c(-1) AND ahcys_c(1) AND h_c(1)
Y_at_1917	RluD_mono
Gm_at_2251	RlmB_mono	amet_c(-1) AND ahcys_c(1) AND h_c(1)
m2A_at_2503	RlmN_mono_mod_1:4fe4s	amet_c(-1) AND ahcys_c(1) AND h_c(1)
Y_at_2504	RluC_mono
Y_at_2580	RluC_mono
Y_at_2605	RluB_mono
Y_at_516	RsuA_mono
m7G_at_527	GidB_mono	amet_c(-1) AND ahcys_c(1) AND h_c(1)
m22G_at_966	RsmD_mono	amet_c(-1) AND ahcys_c(1) AND h_c(1)
m5C_at_967	RsmB_mono	amet_c(-1) AND ahcys_c(1) AND h_c(1)
Cm_at_1195	RsmH_mono	amet_c(-1) AND ahcys_c(1) AND h_c(1)
D_at_1211	DusI_mono_mod_1:fad AND DusII_mono_mod_1:fad	h_c(-1) AND nadh_c(-1) AND nad_c(1)
m4Cm_at_1402	RsmI_mono AND RsmH_mono	amet_c(-2) AND ahcys_c(2) AND h_c(2)
m5C_at_1409	RsmB_mono	amet_c(-1) AND ahcys_c(1) AND h_c(1)
m3U_at_1498	RsmE_mono	amet_c(-1) AND ahcys_c(1) AND h_c(1)
m62A_at_1518	RsmA_mono	amet_c(-2) AND ahcys_c(2) AND h_c(2)
m62A_at_1519	RsmA_mono	amet_c(-2) AND ahcys_c(2) AND h_c(2)

## Sheet: Table 7
Catalyst	Gene	Modification	References
MiaA_mono_mod_1:mg2	CLJU_c21220	A(37) → i6A	a, b
MiaB_mono_mod_2:4fe4s	CLJU_c21250	i6A(37) → ms2i6A	a, b
TadA_dim_mod_2:zn2	CLJU_c00760	A(34) → I	a, b
CLJU_c01470_mono	CLJU_c01470	A(37) → m6A	a, b
CLJU_c11280_mono_mod_1:mg2	CLJU_c111280	tRNA → tRNA+3' CAA	c, d
CLJU_c01520_mono_mod_1:mg2	CLJU_c01520	tRNA → tRNA+3' CAA	c, d
TsaC_mono	CLJU_c02290		e
TsaCII_mono	CLJU_c26950		e
TsaEBD_CPLX_mod_1:fe2	CLJU_c37400, CLJU_c38180, CLJU_c38190	A(37) → t6A	a, e, f
MtaB_mono_mod_2:4fe4s	CLJU_c08020	t6A(37) → ms2t6A	g
TrmD_dim	CLJU_c12920	G(37) → m1G	a, b, h
TrmDII_dim	CLJU_c35670	G(37) → m1G	a, b, h
TruB_mono	CLJU_c13180	U(55) → Y	i, j
MnmA_mono	CLJU_c23380	U(34) → s2U	k
TrmB_dim_mod_1:k	CLJU_c29660	G(46) → m7G	l
Tgt_hex_mod_6:zn2	CLJU_c33800	G(34) → Q1	m
QueA_mono	CLJU_c33810	Q1 → oQ	n, o
QueG_mono_mod_2:4fe4s_mod_1:adocbl	CLJU_c32750	oQ → Q	o, p
QueGII_mono_mod_2:4fe4s_mod_1:adocbl	CLJU_c26330	oQ → Q	p
TrmL_dim	CLJU_c39190	cmnm5U(34) → cmnm5Um	q
TrmL_dim	CLJU_c39190	C(34) → Cm	q
TruA_dim	CLJU_c40720	U(38-40) → Y	r
MnmEG_cplx_mod_2:fad_mod_2:k	CLJU_c42910, CLJU_c42920	U(34) → cmnm5	s, t
MnmEG_cplx_mod_2:fad_mod_2:k	CLJU_c42910, CLJU_c42920	s2U(34) → cmnm5s2	s, t
aThe Uniprot Consortium. 2017 Nucleic Acids Res
bThiele I, et al. 2012 Plos One
cHou Y. 2010 IUBMB Life
dWegscheid B, Hartmann RK. 2007 Nucleic Acids Res
eDeutsch C, et al. 2012 J Biol Chem
fEl Yacoubi B, et al. 2011 The EMBO Journal
gArragain S et al. 2010 J Biol Chem
hSakaguchi R, et al. 2012 RNA
iGutgsell N, et al. 2000 RNA
jNurse K, et al. 1995 RNA
kKambampati R and Lauhon CT. 2003 Biochemistry
lZegers I, et al. 2006 Nucleic Acids Res
mGarcia G, Koch KA, Chong S. 1993 J Mol Biol
nSlany RK, Bosl M, Kersten H. 1994 Biochimie
oGrimm C, et al. 2006 Biochem Biophys Res Comm
pMiles ZD, et al. 2011 PNAS
qBenitez-Paez A, et al. 2010 RNA
rHur S and Stroud RM. 2007 Mol Cell
sMeyer S, e al. 2008 J Mol Biol
tYim L, et al. 2006 Nucleic Acids Res

## Sheet: Table 8
Reaction_name	Complexes	Metabolites
ms2i6A_at_A37	MiaA_mono_mod_1:mg2 AND MiaB_mono_mod_2:4fe4s	dmpp_c(-1) AND ppi_c(1) AND amet_c(-2) AND ahcys_c(1) AND h_c(2) AND met__L_c(1) AND dad__5_c(1)
I_at_A34	TadA_dim_mod_2:zn2	h2o_c(-1) AND h_c(-1) AND nh4_c(1)
m6A_at_A37	CLJU_c01470_mono	amet_c(-1) AND ahcys_c(1) AND h_c(1)
CAA_cap	generic_Cca	ctp_c(-2) AND atp_c(-1) AND ppi_c(3)
ms2t6A_at_A37	TsaEBD_CPLX_mod_1:fe2 AND MtaB_mono_mod_2:4fe4s AND generic_TsaC	hco3_c(-1) AND thr__L_c(-1) AND atp_c(-1) AND mg2_c(-1) AND h2o_c(1) AND ppi_c(1) AND h_c(3) AND amp_c(1) AND amet_c(-2) AND ahcys_c(1) AND met__L_c(1) AND dad__5_c(1)
m1G_at_G37	generic_TrmD	amet_c(-1) AND ahcys_c(1) AND h_c(1)
Y_at_U55	TruB_mono
s2U_at_U34	MnmA_mono AND generic_IscS	generic_IscS_mod_1:SH(-1) AND generic_IscS(1) AND trdrd_c(-1) AND trdox_c(1) AND atp_c(-1) AND amp_c(1) AND ppi_c(1) AND h_c(1)
m7G_at_G46	TrmB_dim_mod_1:k	amet_c(-1) AND ahcys_c(1) AND h_c(1)
Q_at_G34	Tgt_hex_mod_6:zn2 AND QueA_mono AND generic_QueG	preq1_c(-1) AND amet_c(-1) AND gua_c(1) AND ade_c(1) AND met__L_c(1) AND h_c(2)
Cm_at_C34	TrmL_dim	amet_c(-1) AND ahcys_c(1) AND h_c(1)
Y_at_U39	TruA_dim
cmnm5_at_U34	MnmEG_cplx_mod_2:fad_mod_2:k	gtp_c(-1) AND h2o_c(-1) AND 10fthf_c(-1) AND gly_c(-1) AND amet_c(-1) AND ahcys_c(1) AND h_c(3) AND gdp_c(1) AND glx_c(1) AND pi_c(1) AND thf_c(1)
cmnm5s2_at_s2U34	MnmEG_cplx_mod_2:fad_mod_2:k	gtp_c(-1) AND h2o_c(-1) AND 10fthf_c(-1) AND gly_c(-1) AND amet_c(-1) AND ahcys_c(1) AND h_c(3) AND gdp_c(1) AND glx_c(1) AND pi_c(1) AND thf_c(1)
3_prime_cleaved	RNase_Z_mod_2:zn2
3_prime_cleaved_CAA	RNase_PH
5_prime_cleaved	RNase_P

## Sheet: Table 9
tRNA	Reaction_name
CLJU_c00110	ms2t6A_at_A37
CLJU_c00110	Y_at_U55
CLJU_c00110	m7G_at_G46
CLJU_c00110	3_prime_cleaved
CLJU_c00110	5_prime_cleaved
CLJU_c00180	ms2i6A_at_A37
CLJU_c00180	Y_at_U55
CLJU_c00180	3_prime_cleaved
CLJU_c00180	5_prime_cleaved
CLJU_c00190	ms2t6A_at_A37
CLJU_c00190	Y_at_U55
CLJU_c00190	3_prime_cleaved
CLJU_c00190	5_prime_cleaved
CLJU_c00200	I_at_A34
CLJU_c00200	Y_at_U55
CLJU_c00200	m7G_at_G46
CLJU_c00200	3_prime_cleaved
CLJU_c00200	5_prime_cleaved
CLJU_c00750	Y_at_U55
CLJU_c00750	m7G_at_G46
CLJU_c00750	3_prime_cleaved
CLJU_c00750	5_prime_cleaved
CLJU_c00770	ms2i6A_at_A37
CLJU_c00770	Y_at_U55
CLJU_c00770	Y_at_U39
CLJU_c00770	3_prime_cleaved
CLJU_c00770	5_prime_cleaved
CLJU_c00840	ms2i6A_at_A37
CLJU_c00840	Y_at_U55
CLJU_c00840	3_prime_cleaved
CLJU_c00840	5_prime_cleaved
CLJU_c01030	ms2t6A_at_A37
CLJU_c01030	Y_at_U55
CLJU_c01030	s2U_at_U34
CLJU_c01030	cmnm5s2_at_s2U34
CLJU_c01030	m7G_at_G46
CLJU_c01030	Y_at_U39
CLJU_c01030	3_prime_cleaved
CLJU_c01030	5_prime_cleaved
CLJU_c01170	ms2i6A_at_A37
CLJU_c01170	Y_at_U55
CLJU_c01170	m7G_at_G46
CLJU_c01170	Y_at_U39
CLJU_c01170	3_prime_cleaved
CLJU_c01170	5_prime_cleaved
CLJU_c01330	ms2i6A_at_A37
CLJU_c01330	Y_at_U55
CLJU_c01330	3_prime_cleaved
CLJU_c01330	5_prime_cleaved
CLJU_c02530	ms2t6A_at_A37
CLJU_c02530	Y_at_U55
CLJU_c02530	m7G_at_G46
CLJU_c02530	Y_at_U39
CLJU_c02530	3_prime_cleaved
CLJU_c02530	5_prime_cleaved
CLJU_c02540	ms2i6A_at_A37
CLJU_c02540	Y_at_U55
CLJU_c02540	Q_at_G34
CLJU_c02540	Y_at_U39
CLJU_c02540	3_prime_cleaved
CLJU_c02540	5_prime_cleaved
CLJU_c02550	m6A_at_A37
CLJU_c02550	Y_at_U55
CLJU_c02550	m7G_at_G46
CLJU_c02550	3_prime_cleaved
CLJU_c02550	5_prime_cleaved
CLJU_c02560	ms2t6A_at_A37
CLJU_c02560	Y_at_U55
CLJU_c02560	m7G_at_G46
CLJU_c02560	Y_at_U39
CLJU_c02560	3_prime_cleaved
CLJU_c02560	5_prime_cleaved
CLJU_c02570	ms2i6A_at_A37
CLJU_c02570	Y_at_U55
CLJU_c02570	Q_at_G34
CLJU_c02570	Y_at_U39
CLJU_c02570	3_prime_cleaved
CLJU_c02570	5_prime_cleaved
CLJU_c02760	m1G_at_G37
CLJU_c02760	Y_at_U55
CLJU_c02760	3_prime_cleaved
CLJU_c02760	5_prime_cleaved
CLJU_c06240	m7G_at_G46
CLJU_c06240	Y_at_U55
CLJU_c06240	3_prime_cleaved
CLJU_c06240	5_prime_cleaved
CLJU_c06250	ms2t6A_at_A37
CLJU_c06250	Y_at_U55
CLJU_c06250	m7G_at_G46
CLJU_c06250	3_prime_cleaved
CLJU_c06250	5_prime_cleaved
CLJU_c06320	ms2i6A_at_A37
CLJU_c06320	Y_at_U55
CLJU_c06320	m7G_at_G46
CLJU_c06320	Y_at_U39
CLJU_c06320	3_prime_cleaved
CLJU_c06320	5_prime_cleaved
CLJU_c06530	Y_at_U55
CLJU_c06530	m7G_at_G46
CLJU_c06530	3_prime_cleaved
CLJU_c06530	5_prime_cleaved
CLJU_c06540	ms2t6A_at_A37
CLJU_c06540	Y_at_U55
CLJU_c06540	m7G_at_G46
CLJU_c06540	3_prime_cleaved
CLJU_c06540	5_prime_cleaved
CLJU_c06570	ms2t6A_at_A37
CLJU_c06570	Y_at_U55
CLJU_c06570	Q_at_G34
CLJU_c06570	3_prime_cleaved
CLJU_c06570	5_prime_cleaved
CLJU_c14920	ms2t6A_at_A37
CLJU_c14920	Y_at_U55
CLJU_c14920	m7G_at_G46
CLJU_c14920	3_prime_cleaved
CLJU_c14920	5_prime_cleaved
CLJU_c27280	ms2i6A_at_A37
CLJU_c27280	CAA_cap
CLJU_c27280	Y_at_U55
CLJU_c27280	m7G_at_G46
CLJU_c27280	3_prime_cleaved_CAA
CLJU_c27280	5_prime_cleaved
CLJU_c27690	ms2i6A_at_A37
CLJU_c27690	CAA_cap
CLJU_c27690	Y_at_U55
CLJU_c27690	m7G_at_G46
CLJU_c27690	3_prime_cleaved_CAA
CLJU_c27690	5_prime_cleaved
CLJU_c28440	m1G_at_G37
CLJU_c28440	Y_at_U55
CLJU_c28440	Y_at_U39
CLJU_c28440	3_prime_cleaved
CLJU_c28440	5_prime_cleaved
CLJU_c28450	ms2t6A_at_A37
CLJU_c28450	Y_at_U55
CLJU_c28450	s2U_at_U34
CLJU_c28450	cmnm5s2_at_s2U34
CLJU_c28450	m7G_at_G46
CLJU_c28450	Y_at_U39
CLJU_c28450	3_prime_cleaved
CLJU_c28450	5_prime_cleaved
CLJU_c28460	Y_at_U55
CLJU_c28460	Y_at_U39
CLJU_c28460	cmnm5s2_at_s2U34
CLJU_c28460	3_prime_cleaved
CLJU_c28460	5_prime_cleaved
CLJU_c31750	Y_at_U55
CLJU_c31750	3_prime_cleaved
CLJU_c31750	5_prime_cleaved
CLJU_c32740	ms2i6A_at_A37
CLJU_c32740	Y_at_U55
CLJU_c32740	Cm_at_C34
CLJU_c32740	Y_at_U39
CLJU_c32740	3_prime_cleaved
CLJU_c32740	5_prime_cleaved
CLJU_c33580	m1G_at_G37
CLJU_c33580	Y_at_U55
CLJU_c33580	3_prime_cleaved
CLJU_c33580	5_prime_cleaved
CLJU_c34490	m6A_at_A37
CLJU_c34490	Y_at_U55
CLJU_c34490	m7G_at_G46
CLJU_c34490	3_prime_cleaved
CLJU_c34490	5_prime_cleaved
CLJU_c34500	ms2i6A_at_A37
CLJU_c34500	Y_at_U55
CLJU_c34500	m7G_at_G46
CLJU_c34500	Y_at_U39
CLJU_c34500	3_prime_cleaved
CLJU_c34500	5_prime_cleaved
CLJU_c34510	Y_at_U55
CLJU_c34510	m7G_at_G46
CLJU_c34510	3_prime_cleaved
CLJU_c34510	5_prime_cleaved
CLJU_c34520	ms2i6A_at_A37
CLJU_c34520	Y_at_U55
CLJU_c34520	3_prime_cleaved
CLJU_c34520	5_prime_cleaved
CLJU_c36690	Y_at_U55
CLJU_c36690	m7G_at_G46
CLJU_c36690	Y_at_U39
CLJU_c36690	3_prime_cleaved
CLJU_c36690	5_prime_cleaved
CLJU_c36700	Y_at_U55
CLJU_c36700	3_prime_cleaved
CLJU_c36700	5_prime_cleaved
CLJU_c36710	m1G_at_G37
CLJU_c36710	Y_at_U55
CLJU_c36710	m7G_at_G46
CLJU_c36710	3_prime_cleaved
CLJU_c36710	5_prime_cleaved
CLJU_c36720	ms2t6A_at_A37
CLJU_c36720	Y_at_U55
CLJU_c36720	m7G_at_G46
CLJU_c36720	Y_at_U39
CLJU_c36720	3_prime_cleaved
CLJU_c36720	5_prime_cleaved
CLJU_c36730	ms2t6A_at_A37
CLJU_c36730	Y_at_U55
CLJU_c36730	m7G_at_G46
CLJU_c36730	cmnm5s2_at_s2U34
CLJU_c36730	3_prime_cleaved
CLJU_c36730	5_prime_cleaved
CLJU_c36740	Y_at_U55
CLJU_c36740	3_prime_cleaved
CLJU_c36740	5_prime_cleaved
CLJU_c36750	Y_at_U55
CLJU_c36750	m7G_at_G46
CLJU_c36750	3_prime_cleaved
CLJU_c36750	5_prime_cleaved
CLJU_c36760	m1G_at_G37
CLJU_c36760	Y_at_U55
CLJU_c36760	Y_at_U39
CLJU_c36760	3_prime_cleaved
CLJU_c36760	5_prime_cleaved
CLJU_c36770	ms2t6A_at_A37
CLJU_c36770	Y_at_U55
CLJU_c36770	s2U_at_U34
CLJU_c36770	cmnm5s2_at_s2U34
CLJU_c36770	m7G_at_G46
CLJU_c36770	Y_at_U39
CLJU_c36770	3_prime_cleaved
CLJU_c36770	5_prime_cleaved
CLJU_c36780	Y_at_U55
CLJU_c36780	Y_at_U39
CLJU_c36780	cmnm5s2_at_s2U34
CLJU_c36780	3_prime_cleaved
CLJU_c36780	5_prime_cleaved
CLJU_c36790	m1G_at_G37
CLJU_c36790	Y_at_U55
CLJU_c36790	m7G_at_G46
CLJU_c36790	Q_at_G34
CLJU_c36790	Y_at_U39
CLJU_c36790	Y_at_U39
CLJU_c36790	3_prime_cleaved
CLJU_c36790	5_prime_cleaved
CLJU_c36800	ms2t6A_at_A37
CLJU_c36800	Y_at_U55
CLJU_c36800	m7G_at_G46
CLJU_c36800	Y_at_U39
CLJU_c36800	3_prime_cleaved
CLJU_c36800	5_prime_cleaved
CLJU_c36810	ms2t6A_at_A37
CLJU_c36810	Y_at_U55
CLJU_c36810	m7G_at_G46
CLJU_c36810	cmnm5s2_at_s2U34
CLJU_c36810	3_prime_cleaved
CLJU_c36810	5_prime_cleaved
CLJU_c36820	Y_at_U55
CLJU_c36820	3_prime_cleaved
CLJU_c36820	5_prime_cleaved
CLJU_c36830	m1G_at_G37
CLJU_c36830	Y_at_U55
CLJU_c36830	m7G_at_G46
CLJU_c36830	3_prime_cleaved
CLJU_c36830	5_prime_cleaved
CLJU_c38150	ms2i6A_at_A37
CLJU_c38150	Y_at_U55
CLJU_c38150	m7G_at_G46
CLJU_c38150	3_prime_cleaved
CLJU_c38150	5_prime_cleaved
CLJU_c39240	m1G_at_G37
CLJU_c39240	Y_at_U55
CLJU_c39240	Y_at_U39
CLJU_c39240	Y_at_U39
CLJU_c39240	3_prime_cleaved
CLJU_c39240	5_prime_cleaved
CLJU_c41210	ms2t6A_at_A37
CLJU_c41210	Y_at_U55
CLJU_c41210	m7G_at_G46
CLJU_c41210	3_prime_cleaved
CLJU_c41210	5_prime_cleaved
CLJU_c41220	Y_at_U55
CLJU_c41220	m7G_at_G46
CLJU_c41220	Y_at_U39
CLJU_c41220	3_prime_cleaved
CLJU_c41220	5_prime_cleaved
CLJU_c41390	ms2t6A_at_A37
CLJU_c41390	Y_at_U55
CLJU_c41390	m7G_at_G46
CLJU_c41390	Q_at_G34
CLJU_c41390	3_prime_cleaved
CLJU_c41390	5_prime_cleaved
CLJU_c41400	Y_at_U55
CLJU_c41400	m7G_at_G46
CLJU_c41400	3_prime_cleaved
CLJU_c41400	5_prime_cleaved
CLJU_c41410	ms2t6A_at_A37
CLJU_c41410	Y_at_U55
CLJU_c41410	m7G_at_G46
CLJU_c41410	3_prime_cleaved
CLJU_c41410	5_prime_cleaved
CLJU_c41470	ms2t6A_at_A37
CLJU_c41470	Y_at_U55
CLJU_c41470	m7G_at_G46
CLJU_c41470	Q_at_G34
CLJU_c41470	3_prime_cleaved
CLJU_c41470	5_prime_cleaved
CLJU_c41570	ms2t6A_at_A37
CLJU_c41570	Y_at_U55
CLJU_c41570	m7G_at_G46
CLJU_c41570	3_prime_cleaved
CLJU_c41570	5_prime_cleaved
CLJU_c41580	ms2i6A_at_A37
CLJU_c41580	m7G_at_G46
CLJU_c41580	Y_at_U55
CLJU_c41580	Y_at_U39
CLJU_c41580	cmnm5s2_at_s2U34
CLJU_c41580	3_prime_cleaved
CLJU_c41580	5_prime_cleaved
CLJU_c41590	ms2t6A_at_A37
CLJU_c41590	Y_at_U55
CLJU_c41590	m7G_at_G46
CLJU_c41590	3_prime_cleaved
CLJU_c41590	5_prime_cleaved
CLJU_c41600	ms2t6A_at_A37
CLJU_c41600	Y_at_U55
CLJU_c41600	m7G_at_G46
CLJU_c41600	3_prime_cleaved
CLJU_c41600	5_prime_cleaved
CLJU_c41610	ms2i6A_at_A37
CLJU_c41610	m7G_at_G46
CLJU_c41610	Y_at_U55
CLJU_c41610	Y_at_U39
CLJU_c41610	cmnm5s2_at_s2U34
CLJU_c41610	3_prime_cleaved
CLJU_c41610	5_prime_cleaved
CLJU_c41830	m1G_at_G37
CLJU_c41830	Y_at_U55
CLJU_c41830	m7G_at_G46
CLJU_c41830	3_prime_cleaved
CLJU_c41830	5_prime_cleaved
CLJU_c42240	ms2t6A_at_A37
CLJU_c42240	Y_at_U55
CLJU_c42240	m7G_at_G46
CLJU_c42240	Y_at_U39
CLJU_c42240	3_prime_cleaved
CLJU_c42240	5_prime_cleaved
CLJU_c42250	Y_at_U55
CLJU_c42250	m7G_at_G46
CLJU_c42250	Q_at_G34
CLJU_c42250	3_prime_cleaved
CLJU_c42250	5_prime_cleaved
CLJU_c42260	m6A_at_A37
CLJU_c42260	Y_at_U55
CLJU_c42260	m7G_at_G46
CLJU_c42260	3_prime_cleaved
CLJU_c42260	5_prime_cleaved
CLJU_c42270	s2U_at_U34
CLJU_c42270	cmnm5s2_at_s2U34
CLJU_c42270	Y_at_U55
CLJU_c42270	3_prime_cleaved
CLJU_c42270	5_prime_cleaved
CLJU_c42280	Y_at_U55
CLJU_c42280	m7G_at_G46
CLJU_c42280	Q_at_G34
CLJU_c42280	3_prime_cleaved
CLJU_c42280	5_prime_cleaved
CLJU_c42290	m6A_at_A37
CLJU_c42290	Y_at_U55
CLJU_c42290	m7G_at_G46
CLJU_c42290	3_prime_cleaved
CLJU_c42290	5_prime_cleaved
CLJU_c42300	s2U_at_U34
CLJU_c42300	cmnm5s2_at_s2U34
CLJU_c42300	Y_at_U55
CLJU_c42300	3_prime_cleaved
CLJU_c42300	5_prime_cleaved
CLJU_c42680	ms2t6A_at_A37
CLJU_c42680	Y_at_U55
CLJU_c42680	m7G_at_G46
CLJU_c42680	Y_at_U39

[truncated: 11 more sheets: Table 10, Table 11, Table 12, Table 13, Table 14, Table 15, Table 16, Table 17, Table 18, Table 19, Table 20]
